# Supplementary material
Source: PubMed Central journal article supplement (PMC2532704)
Supplement: NIHMS60710-supplement-SI_pdf.pdf [file NIHMS60710-supplement-SI_pdf.pdf]

## Supporting Information

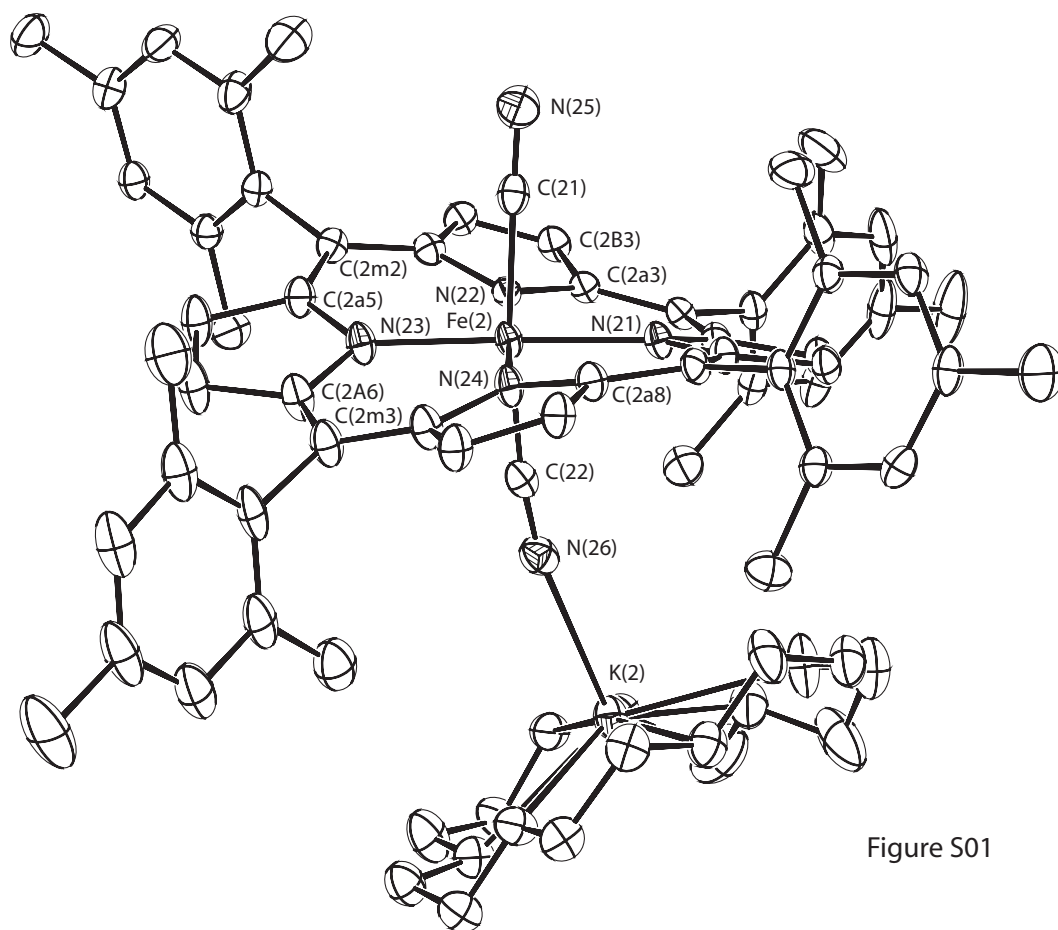

Figure S01

**Figure S1.** ORTEP diagram of the second unit in the cell of [K(18-C-6)][Fe(TMP)(CN)<sub>2</sub>] displaying the atom labeling scheme. Thermal ellipsoids of all atoms are contoured at the 50% probability level. Hydrogen atoms have been omitted for clarity.

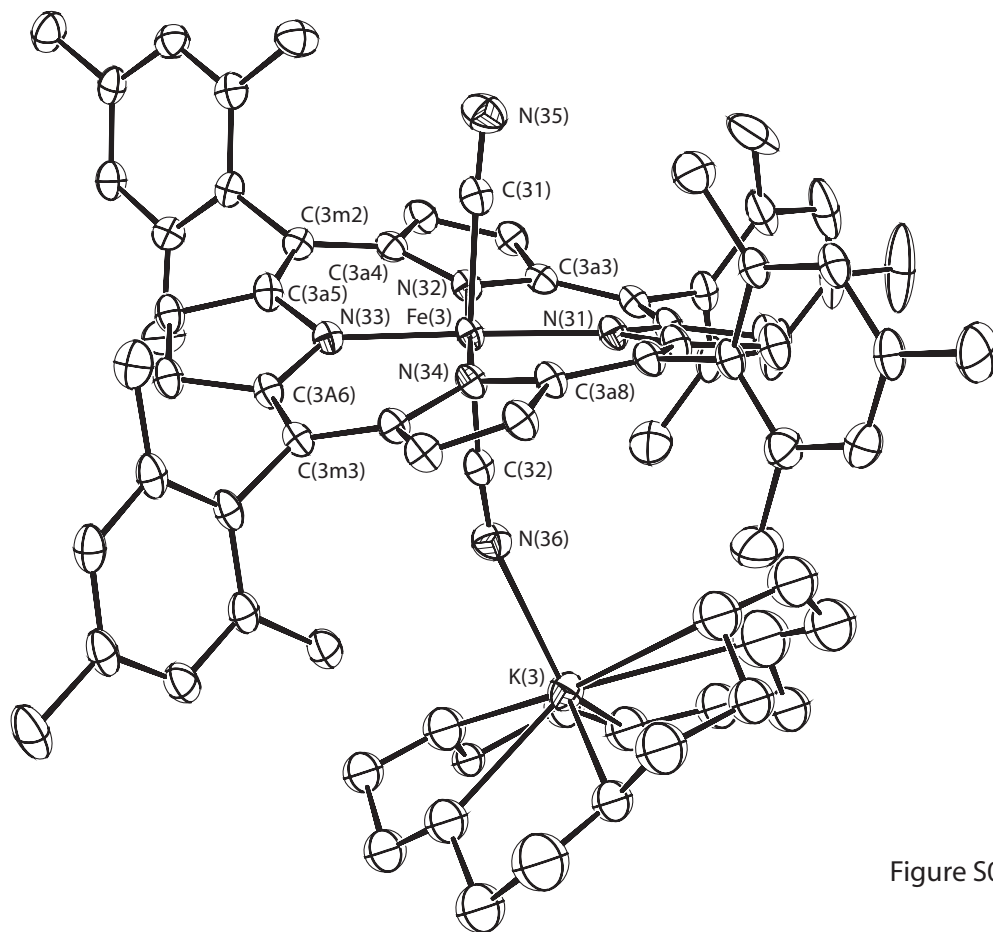

Figure S02

**Figure S2.** ORTEP diagram of the third unit in  $[K(18-C-6)][Fe(TMP)(CN)_2]$  displaying the atom labeling scheme. Thermal ellipsoids of all atoms are contoured at the 50% probability level. Hydrogen atoms have been omitted for clarity.

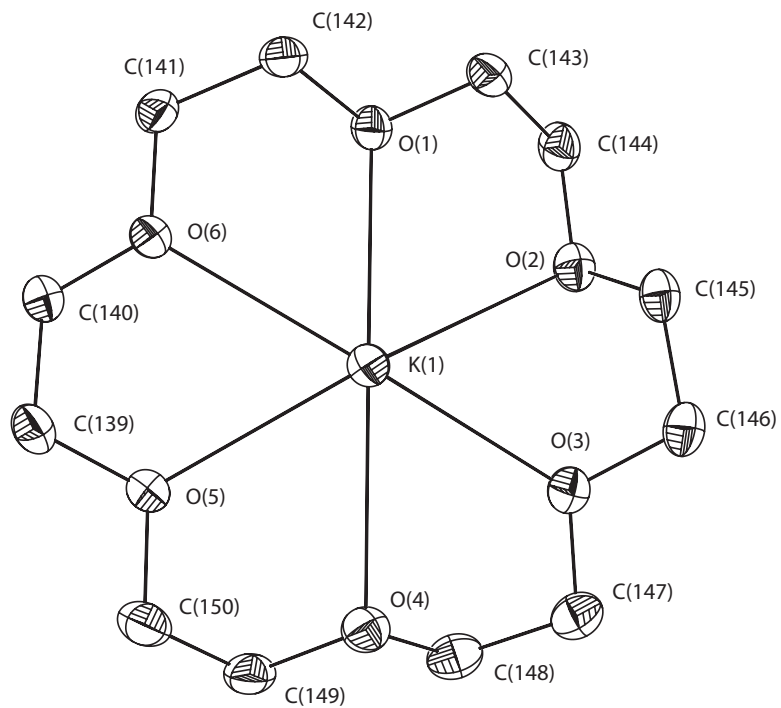

Figure S03

**Figure S3.** ORTEP diagram of the ordered 18-crown-6 ring in the first  $[K(18-C-6)][Fe(TMP)(CN)_2]$  unit displaying the atom labeling scheme. 50% probability contours are shown.

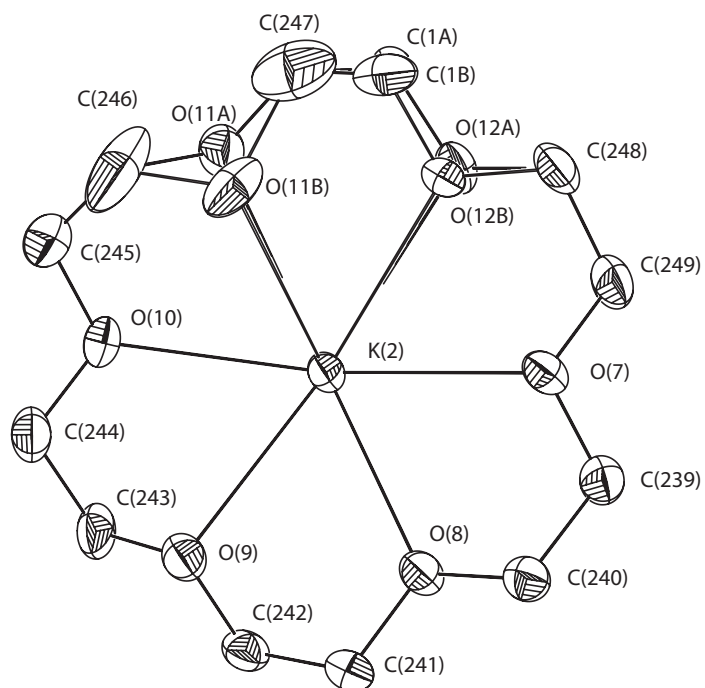

Figure S04

**Figure S4.** ORTEP diagram of the disordered 18-crown-6 ring in the second  $[K(18-C-6)][Fe(TMP)(CN)_2]$  unit displaying the atom labeling scheme. 50% probability countours are shown.

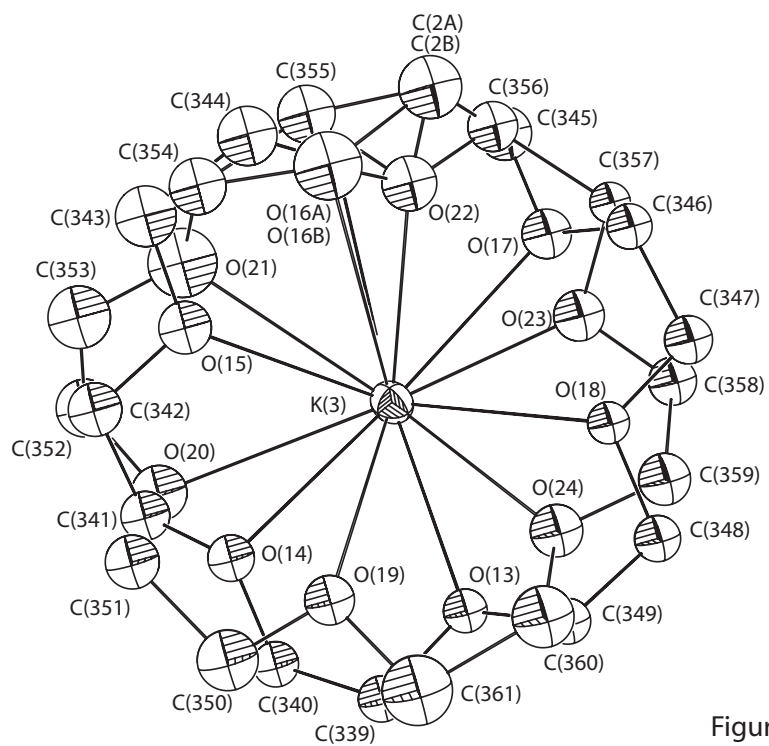

Figure S05

**Figure S5.** ORTEP diagram of the disordered 18-crown-6 ring in the third  $[K(18-C-6)][Fe(TMP)(CN)_2]$  unit displaying the atom labeling scheme. 50% probability countours are shown.

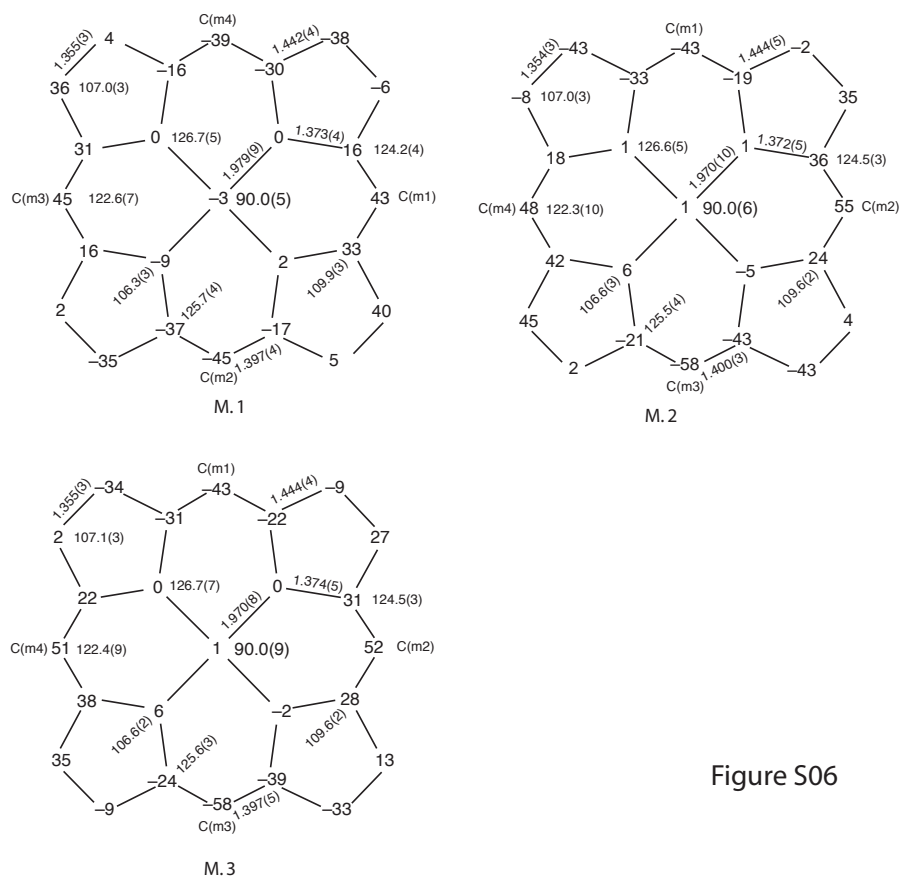

Figure S06

**Figure S6.** Formal diagrams of the porphyrin cores for all entities (1, 2, 3) of  $[\text{K}(18\text{-C-6})][\text{Fe}(\text{TMP})(\text{CN})_2]$ . Averaged values of the chemically unique bond distances (in 0.01 Å) and angles (in degrees) are shown. Positive values of displacements are toward the cyanide ligand that is not also coordinated to the  $[\text{K}(18\text{-crown-6})]$  cation.

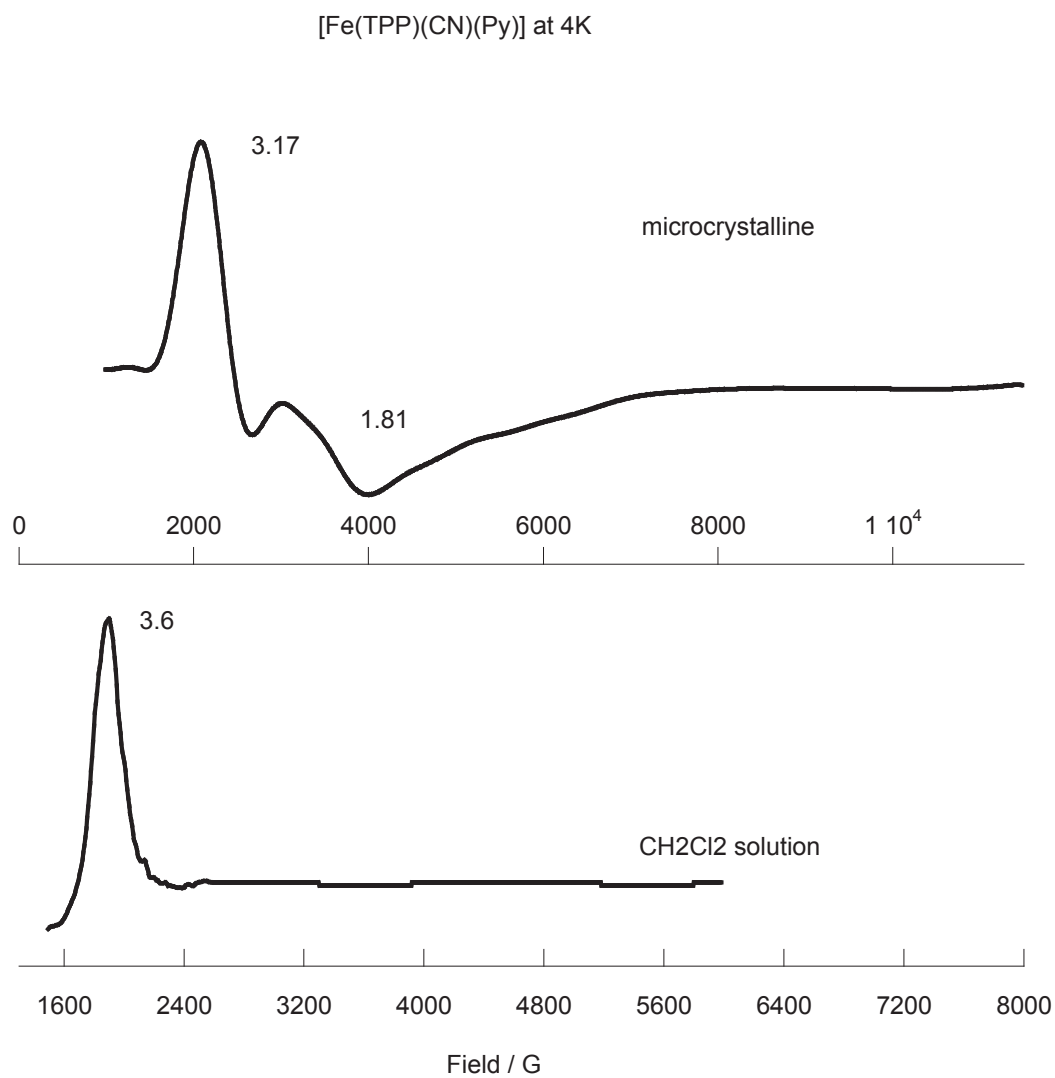

**Figure S7.** EPR spectra for [Fe(TPP)(CN)(Py)] in the solid state and in a frozen CH<sub>2</sub>Cl<sub>2</sub> solution.

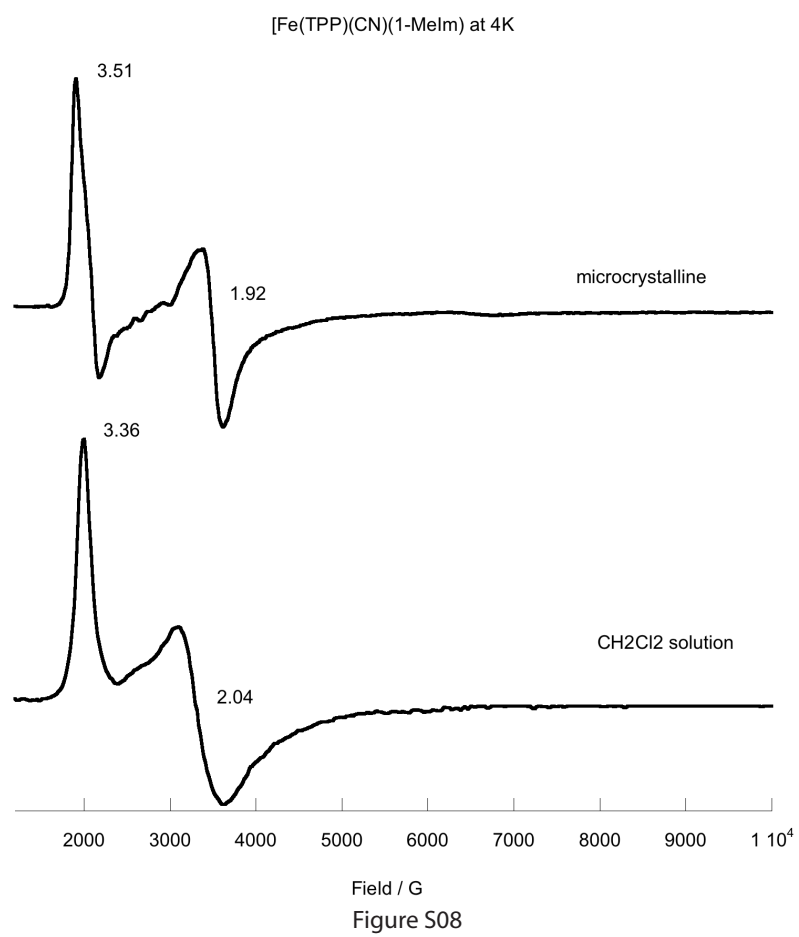

**Figure S8.** EPR spectra for [Fe(TPP)(CN)(1-MeIm)] in the solid state and in a frozen CH<sub>2</sub>Cl<sub>2</sub> solution.



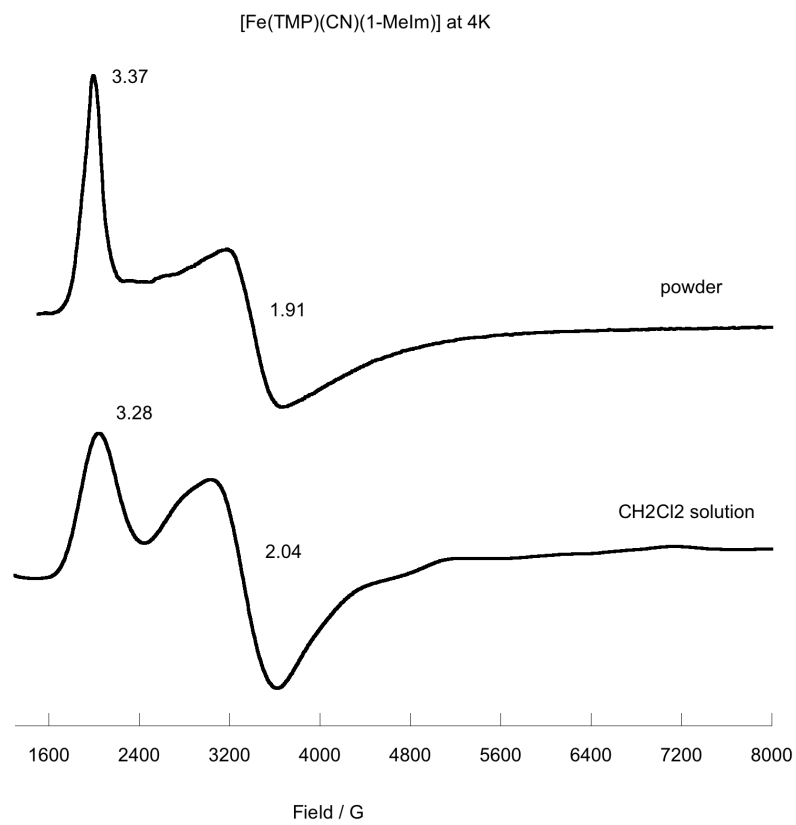

Figure S09

**Figure S9.** EPR spectra for [Fe(TMP)(CN)(1-MeIm)] in the solid state and in a frozen CH<sub>2</sub>Cl<sub>2</sub> solution.

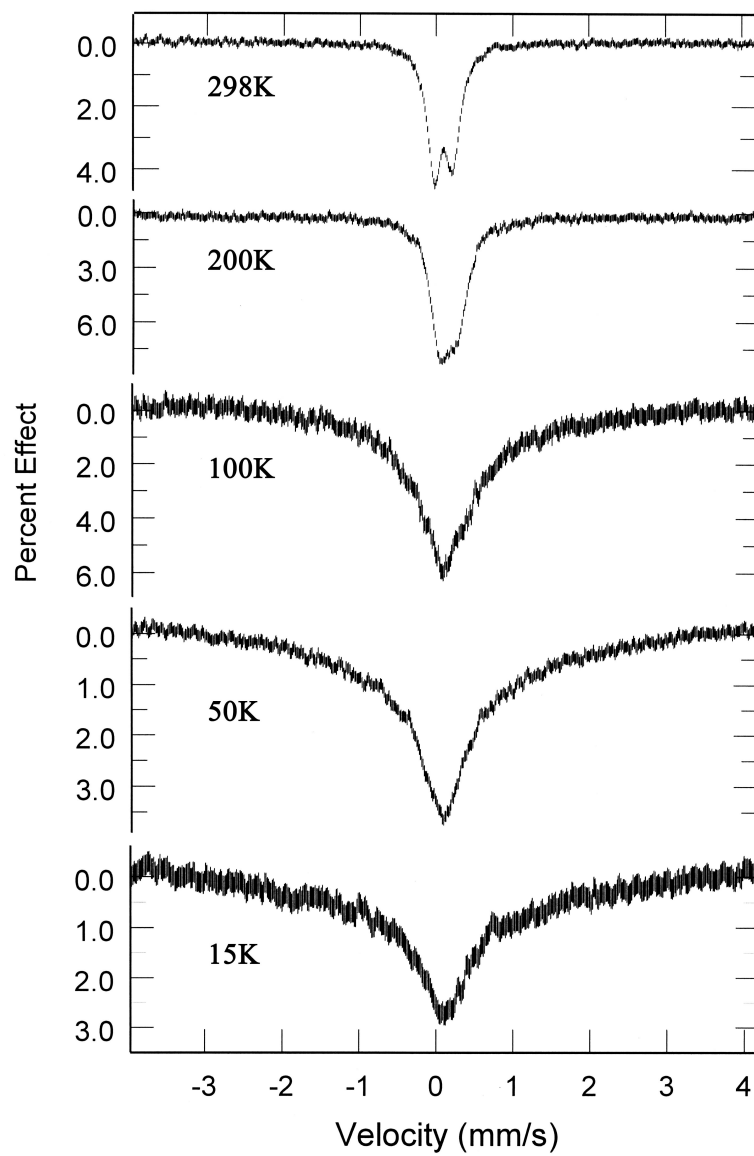

**Figure S10.** Mössbauer spectra for  $[\text{K}((\text{CH}_3)_2\text{CO})_2][\text{Fe}(\text{TPP})(\text{CN})_2]$  over the temperature range of 298 – 15 K.

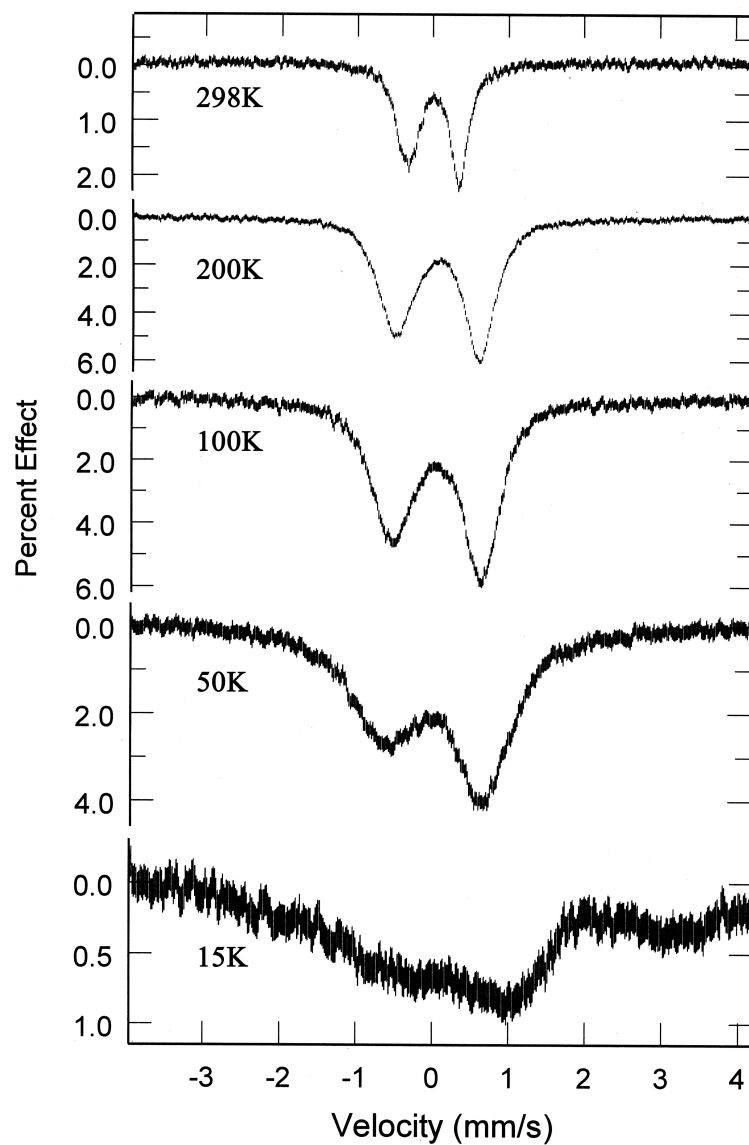

**Figure S11.** Mössbauer spectra for  $[\text{K}(18\text{-C-}6)][\text{Fe}(\text{TMP})(\text{CN})_2]$  over the temperature range of 298 – 15 K.

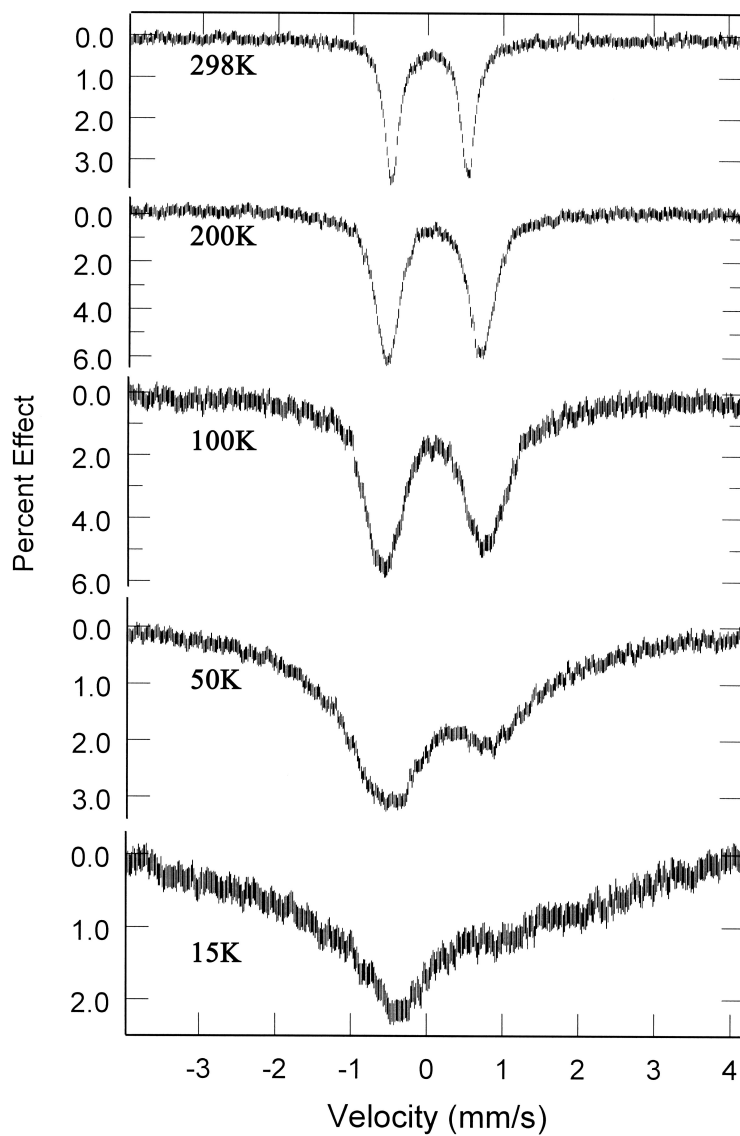

**Figure S12.** Mössbauer spectra for [Fe(TMP)(CN)(1-MeIm)] over the temperature range of 298 – 15 K.

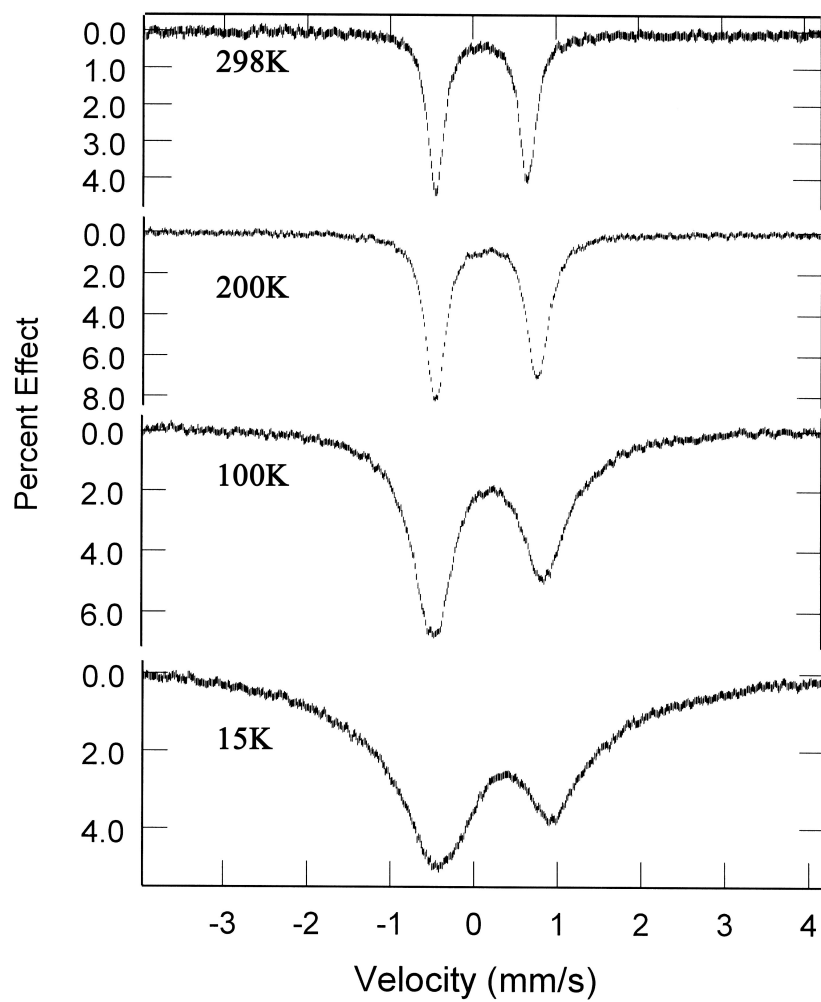

**Figure S13.** Mössbauer spectra for [Fe(TPP)(CN)(1-MeIm)] over the temperature range of 298 – 15 K.

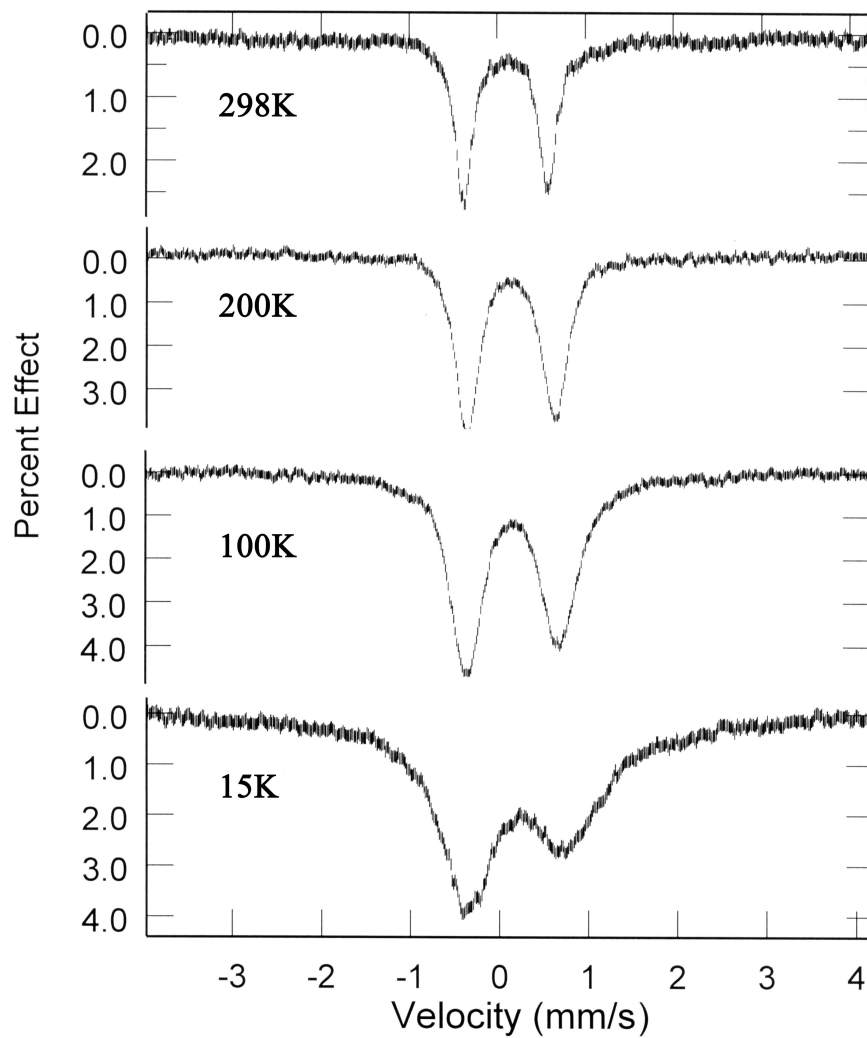

**Figure S14.** Mössbauer spectra for [Fe(TPP)(CN)(Py)] over the temperature range of 298 – 15 K.

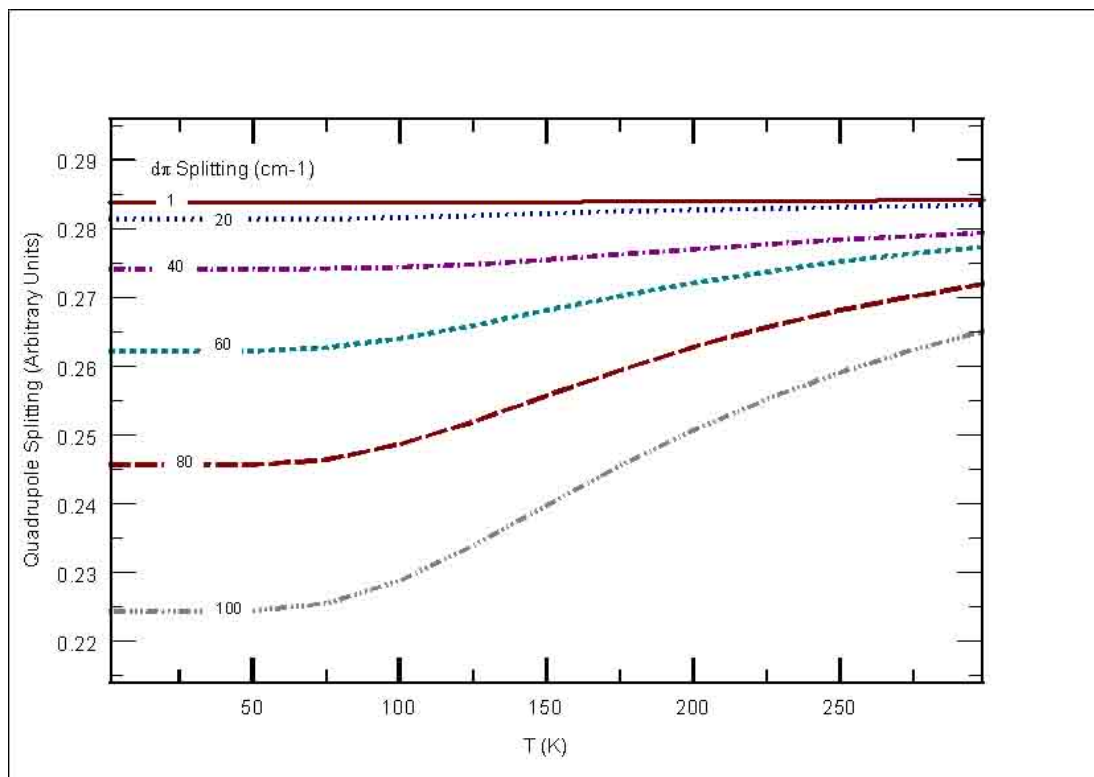

The above graph shows the expected temperature dependence of the quadrupole splitting for various values of the splitting between  $d_{xz}$  and  $d_{yz}$ . The calculation uses a spin-orbit coupling of  $250\text{cm}^{-1}$  and a splitting of  $2000\text{cm}^{-1}$  to the  $d_{xy}$  orbital.

**Figure S15.** Mössbauer QS calculations.

**Table S1.** Details for fitting high-field (5, 9 T) Mössbauer for  $[\text{K}((\text{CH}_3)_2\text{CO})_2][\text{Fe}(\text{TPP})(\text{CN})_2]$

|                             |                         |
|-----------------------------|-------------------------|
| Temperature                 | 4.2 K                   |
| Quadrupole splitting        | -0.40 mm/s              |
| Isomer shift                | 0.19 mm/s               |
| Eta                         | 0.7                     |
| Gamma,                      | 0.40 mm/s               |
| $g$                         | (0.52, 1.05, 3.7)       |
| $A$                         | (-1.8, -2.2, 90.3) T    |
| Euler ( $g \rightarrow Q$ ) | (102, 64, -11) $^\circ$ |
| Euler ( $g \rightarrow A$ ) | (105, 19, 33) $^\circ$  |



**Table S2.** Complete Crystallographic Details for [Fe(TPP)(CN)(Py)]·0.65Py

|                                                              |                                                                   |
|--------------------------------------------------------------|-------------------------------------------------------------------|
| formula                                                      | C <sub>53.25</sub> H <sub>36.25</sub> FeN <sub>6.65</sub>         |
| FW, amu                                                      | 825.09                                                            |
| <i>a</i> , Å                                                 | 13.1214(2)                                                        |
| <i>b</i> , Å                                                 | 23.5538(4)                                                        |
| <i>c</i> , Å                                                 | 14.0324(2)                                                        |
| $\beta$ , deg                                                | 102.606(1)                                                        |
| <i>V</i> , Å <sup>3</sup>                                    | 4232.29(11)                                                       |
| space group                                                  | P21/n                                                             |
| <i>Z</i>                                                     | 4                                                                 |
| D <sub>c</sub> , g/cm <sup>3</sup>                           | 1.295                                                             |
| F(000)                                                       | 1713                                                              |
| $\mu$ , mm <sup>-1</sup>                                     | 0.402                                                             |
| crystal dimensions, mm                                       | 0.55 × 0.53 × 0.40                                                |
| radiation                                                    | MoK $\alpha$ , $\bar{\lambda}$ = 0.71073 Å                        |
| temperature, K                                               | 100(2)                                                            |
| diffractometer                                               | Bruker Apex CCD                                                   |
| $\theta$ range for collected data, deg                       | 2.11–26.00                                                        |
| index range                                                  | –16 ≤ <i>h</i> ≤ 16<br>–29 ≤ <i>k</i> ≤ 29<br>–15 ≤ <i>l</i> ≤ 17 |
| total data collected                                         | 48079                                                             |
| absorption correction                                        | Semi-empirical fromequiv                                          |
| relative transmission coefficients (I)                       | 0.8557 and 0.8091                                                 |
| unique data                                                  | 8310 ( <i>R</i> <sub>int</sub> = 0.0221)                          |
| unique observed data [ <i>I</i> > 2 $\sigma$ ( <i>I</i> )]   | 7789                                                              |
| refinement method                                            | Full-matrix least-squares on F <sup>2</sup>                       |
| data/restraints/parameters                                   | 8310/173/583                                                      |
| goodness-of-fit (pased on <i>F</i> <sup>2</sup> )            | 1.044                                                             |
| final <i>R</i> indices [ <i>I</i> > 2 $\sigma$ ( <i>I</i> )] | <i>R</i> <sub>1</sub> = 0.0515, <i>wR</i> <sub>2</sub> = 0.1511   |
| final <i>R</i> indices (all data)                            | <i>R</i> <sub>1</sub> = 0.0543, <i>wR</i> <sub>2</sub> = 0.1531   |

**Table S3.** Atomic Coordinates and Equivalent Isotropic Displacement Parameters ( $\text{\AA}^2$ ) for  $[\text{Fe}(\text{TPP})(\text{CN})(\text{Py})]\cdot 0.65\text{Py}^a$

| atom  | $x$         | $y$         | $z$         | $U(\text{eq})$ |
|-------|-------------|-------------|-------------|----------------|
| Fe(1) | 0.65769(2)  | 0.19879(1)  | 0.88166(2)  | 0.0141(1)      |
| N(1)  | 0.76691(15) | 0.22118(8)  | 0.81296(14) | 0.0164(4)      |
| N(2)  | 0.56883(15) | 0.26340(8)  | 0.82145(15) | 0.0176(4)      |
| N(3)  | 0.54834(15) | 0.17632(8)  | 0.95108(14) | 0.0162(4)      |
| N(4)  | 0.74838(15) | 0.13625(8)  | 0.94467(14) | 0.0160(4)      |
| N(5)  | 0.57302(18) | 0.12149(10) | 0.70487(17) | 0.0279(5)      |
| N(6)  | 0.72526(16) | 0.25307(9)  | 0.99390(15) | 0.0195(4)      |
| C(a1) | 0.84814(18) | 0.18812(10) | 0.79687(17) | 0.0175(5)      |
| C(a2) | 0.77011(18) | 0.27041(10) | 0.76150(17) | 0.0185(5)      |
| C(a3) | 0.60194(19) | 0.30969(10) | 0.77640(18) | 0.0188(5)      |
| C(a4) | 0.46737(19) | 0.27516(10) | 0.82747(18) | 0.0195(5)      |
| C(a5) | 0.44636(19) | 0.19530(10) | 0.93390(18) | 0.0187(5)      |
| C(a6) | 0.55507(18) | 0.13350(10) | 1.01965(17) | 0.0169(5)      |
| C(a7) | 0.73485(18) | 0.10378(10) | 1.02285(17) | 0.0165(4)      |
| C(a8) | 0.84013(18) | 0.11777(10) | 0.92293(17) | 0.0167(5)      |
| C(b1) | 0.89963(19) | 0.21654(11) | 0.72998(19) | 0.0224(5)      |
| C(b2) | 0.85464(19) | 0.26806(11) | 0.71162(19) | 0.0227(5)      |
| C(b3) | 0.5197(2)   | 0.35139(11) | 0.75430(19) | 0.0235(5)      |
| C(b4) | 0.4367(2)   | 0.32991(11) | 0.7840(2)   | 0.0238(5)      |
| C(b5) | 0.38844(19) | 0.16244(10) | 0.99017(18) | 0.0206(5)      |
| C(b6) | 0.45585(19) | 0.12531(10) | 1.04431(18) | 0.0191(5)      |
| C(b7) | 0.82364(19) | 0.06726(10) | 1.05434(17) | 0.0187(5)      |
| C(b8) | 0.88755(18) | 0.07512(10) | 0.99208(18) | 0.0183(5)      |
| C(m1) | 0.69851(19) | 0.31481(10) | 0.75120(18) | 0.0193(5)      |
| C(m2) | 0.40683(19) | 0.24235(10) | 0.87656(18) | 0.0200(5)      |
| C(m3) | 0.64404(19) | 0.10126(10) | 1.05822(17) | 0.0173(5)      |
| C(m4) | 0.88380(18) | 0.13854(10) | 0.84762(18) | 0.0179(5)      |
| C(1)  | 0.72670(19) | 0.36998(10) | 0.71031(19) | 0.0208(5)      |
| C(2)  | 0.6826(2)   | 0.38709(11) | 0.61553(19) | 0.0240(5)      |
| C(3)  | 0.7103(2)   | 0.43909(11) | 0.5808(2)   | 0.0269(6)      |
| C(4)  | 0.7817(2)   | 0.47396(11) | 0.6404(2)   | 0.0278(6)      |
| C(5)  | 0.8268(2)   | 0.45688(12) | 0.7344(2)   | 0.0329(6)      |
| C(6)  | 0.7999(2)   | 0.40510(12) | 0.7694(2)   | 0.0309(6)      |
| C(7)  | 0.2978(2)   | 0.26179(11) | 0.8753(2)   | 0.0243(5)      |

**Table S3.** Continued

| atom  | <i>x</i>    | <i>y</i>     | <i>z</i>    | <i>U</i> (eq) |
|-------|-------------|--------------|-------------|---------------|
| C(8)  | 0.2236(2)   | 0.26606(11)  | 0.7877(2)   | 0.0272(6)     |
| C(9)  | 0.1233(2)   | 0.28544(12)  | 0.7870(3)   | 0.0335(7)     |
| C(10) | 0.0960(2)   | 0.30068(13)  | 0.8732(3)   | 0.0417(8)     |
| C(11) | 0.1685(3)   | 0.29671(14)  | 0.9603(3)   | 0.0421(8)     |
| C(12) | 0.2692(2)   | 0.27732(13)  | 0.9613(2)   | 0.0338(6)     |
| C(13) | 0.63550(18) | 0.05871(10)  | 1.13572(17) | 0.0177(5)     |
| C(14) | 0.6034(2)   | 0.00332(11)  | 1.11029(19) | 0.0222(5)     |
| C(15) | 0.5833(2)   | -0.03424(11) | 1.1805(2)   | 0.0248(5)     |
| C(16) | 0.5977(2)   | -0.01712(11) | 1.2768(2)   | 0.0267(6)     |
| C(17) | 0.6334(2)   | 0.03716(12)  | 1.3035(2)   | 0.0298(6)     |
| C(18) | 0.6524(2)   | 0.07493(11)  | 1.23300(19) | 0.0258(5)     |
| C(19) | 0.97368(19) | 0.10734(10)  | 0.82327(17) | 0.0193(5)     |
| C(20) | 0.9571(2)   | 0.05294(11)  | 0.7831(2)   | 0.0250(5)     |
| C(21) | 1.0381(2)   | 0.02394(12)  | 0.7548(2)   | 0.0286(6)     |
| C(22) | 1.1365(2)   | 0.04833(12)  | 0.7677(2)   | 0.0271(6)     |
| C(23) | 1.1540(2)   | 0.10156(12)  | 0.80968(19) | 0.0253(5)     |
| C(24) | 1.07306(19) | 0.13124(11)  | 0.83712(19) | 0.0224(5)     |
| C(25) | 0.60222(18) | 0.14984(10)  | 0.77263(18) | 0.0190(5)     |
| C(26) | 0.6699(2)   | 0.29375(11)  | 1.0266(2)   | 0.0263(6)     |
| C(27) | 0.7161(3)   | 0.33480(13)  | 1.0934(2)   | 0.0357(7)     |
| C(28) | 0.8228(3)   | 0.33371(13)  | 1.1279(2)   | 0.0365(7)     |
| C(29) | 0.8805(2)   | 0.29148(13)  | 1.0962(2)   | 0.0315(6)     |
| C(30) | 0.8294(2)   | 0.25225(11)  | 1.02929(19) | 0.0237(5)     |
| N(7)  | 0.9800(7)   | 0.0313(6)    | 0.4954(7)   | 0.104(3)      |
| C(32) | 0.9417(9)   | -0.0206(5)   | 0.5097(8)   | 0.123(4)      |
| C(33) | 0.8463(10)  | -0.0274(4)   | 0.5358(9)   | 0.114(4)      |
| C(34) | 0.7873(7)   | 0.0196(6)    | 0.5467(7)   | 0.113(3)      |
| C(35) | 0.8270(9)   | 0.0730(5)    | 0.5341(8)   | 0.106(3)      |
| C(36) | 0.9220(9)   | 0.0769(5)    | 0.5081(7)   | 0.130(4)      |
| N(8)  | 0.4947(8)   | 0.0747(4)    | 0.4971(6)   | 0.0705(12)    |
| C(31) | 0.5814(8)   | 0.0379(4)    | 0.5444(6)   | 0.0686(14)    |
| C(37) | 0.4292(9)   | 0.0256(4)    | 0.4749(8)   | 0.0875(15)    |
| C(39) | 0.4947(8)   | 0.0747(4)    | 0.4971(6)   | 0.0705(12)    |
| C(40) | 0.5814(8)   | 0.0379(4)    | 0.5444(6)   | 0.0686(14)    |

**Table S3.** Continued

| atom  | $x$       | $y$       | $z$       | $U(\text{eq})$ |
|-------|-----------|-----------|-----------|----------------|
| C(38) | 0.4292(9) | 0.0256(4) | 0.4749(8) | 0.0875(15)     |

<sup>a</sup> $U(\text{eq})$  is defined as one third of the trace of the orthogonalized  $\mathbf{U}_{ij}$  tensor. The estimated standard deviations of the least significant digits are given in parentheses.

**Table S4.** Bond Lengths for [Fe(TPP)(CN)(Py)]·0.65Py<sup>a</sup>

| bond        | length (Å) | bond         | length (Å) |
|-------------|------------|--------------|------------|
| Fe(1)–C(25) | 1.927(3)   | C(7)–C(8)    | 1.395(4)   |
| Fe(1)–N(1)  | 1.966(2)   | C(8)–C(9)    | 1.392(4)   |
| Fe(1)–N(3)  | 1.974(2)   | C(8)–H(8a)   | 0.9500     |
| Fe(1)–N(4)  | 1.977(2)   | C(9)–C(10)   | 1.382(5)   |
| Fe(1)–N(2)  | 1.990(2)   | C(9)–H(9a)   | 0.9500     |
| Fe(1)–N(6)  | 2.072(2)   | C(10)–C(11)  | 1.378(5)   |
| N(1)–C(a2)  | 1.371(3)   | C(10)–H(10a) | 0.9500     |
| N(1)–C(a1)  | 1.378(3)   | C(11)–C(12)  | 1.395(4)   |
| N(2)–C(a3)  | 1.377(3)   | C(11)–H(11a) | 0.9500     |
| N(2)–C(a4)  | 1.380(3)   | C(12)–H(12a) | 0.9500     |
| N(3)–C(a5)  | 1.381(3)   | C(13)–C(18)  | 1.388(4)   |
| N(3)–C(a6)  | 1.383(3)   | C(13)–C(14)  | 1.393(3)   |
| N(4)–C(a8)  | 1.376(3)   | C(14)–C(15)  | 1.391(4)   |
| N(4)–C(a7)  | 1.380(3)   | C(14)–H(14a) | 0.9500     |
| N(5)–C(25)  | 1.157(3)   | C(15)–C(16)  | 1.384(4)   |
| N(6)–C(26)  | 1.343(3)   | C(15)–H(15a) | 0.9500     |
| N(6)–C(30)  | 1.348(3)   | C(16)–C(17)  | 1.385(4)   |
| C(a1)–C(m4) | 1.394(3)   | C(16)–H(16a) | 0.9500     |
| C(a1)–C(b1) | 1.436(3)   | C(17)–C(18)  | 1.392(4)   |
| C(a2)–C(m1) | 1.392(3)   | C(17)–H(17a) | 0.9500     |
| C(a2)–C(b2) | 1.436(3)   | C(18)–H(18a) | 0.9500     |
| C(a3)–C(m1) | 1.393(3)   | C(19)–C(24)  | 1.394(4)   |
| C(a3)–C(b3) | 1.441(3)   | C(19)–C(20)  | 1.398(4)   |
| C(a4)–C(m2) | 1.393(3)   | C(20)–C(21)  | 1.392(4)   |
| C(a4)–C(b4) | 1.445(3)   | C(20)–H(20a) | 0.9500     |
| C(a5)–C(m2) | 1.401(3)   | C(21)–C(22)  | 1.388(4)   |
| C(a5)–C(b5) | 1.436(3)   | C(21)–H(21a) | 0.9500     |
| C(a6)–C(m3) | 1.399(3)   | C(22)–C(23)  | 1.383(4)   |
| C(a6)–C(b6) | 1.431(3)   | C(22)–H(22a) | 0.9500     |
| C(a7)–C(m3) | 1.389(3)   | C(23)–C(24)  | 1.394(4)   |
| C(a7)–C(b7) | 1.438(3)   | C(23)–H(23a) | 0.9500     |
| C(a8)–C(m4) | 1.396(3)   | C(24)–H(24a) | 0.9500     |
| C(a8)–C(b8) | 1.440(3)   | C(26)–C(27)  | 1.391(4)   |
| C(b1)–C(b2) | 1.349(4)   | C(26)–H(26a) | 0.9500     |

**Table S4.** Continued

| bond        | length (Å) | bond          | length (Å) |
|-------------|------------|---------------|------------|
| C(b1)–H(b1) | 0.9500     | C(27)–C(28)   | 1.378(5)   |
| C(b2)–H(b2) | 0.9500     | C(27)–H(27a)  | 0.9500     |
| C(b3)–C(b4) | 1.347(4)   | C(28)–C(29)   | 1.382(5)   |
| C(b3)–H(b3) | 0.9500     | C(28)–H(28a)  | 0.9500     |
| C(b4)–H(b4) | 0.9500     | C(29)–C(30)   | 1.382(4)   |
| C(b5)–C(b6) | 1.353(4)   | C(29)–H(29a)  | 0.9500     |
| C(b5)–H(b5) | 0.9500     | C(30)–H(30a)  | 0.9500     |
| C(b6)–H(b6) | 0.9500     | N(7)–C(32)#1  | 1.076(19)  |
| C(b7)–C(b8) | 1.349(3)   | N(7)–C(36)    | 1.3492     |
| C(b7)–H(b7) | 0.9500     | N(7)–C(32)    | 1.3536     |
| C(b8)–H(b8) | 0.9500     | N(7)–N(7)#1   | 1.56(3)    |
| C(m1)–C(1)  | 1.499(3)   | C(32)–C(33)   | 1.3873     |
| C(m2)–C(7)  | 1.498(3)   | C(32)–H(32)   | 0.9500     |
| C(m3)–C(13) | 1.501(3)   | C(33)–C(34)   | 1.3799     |
| C(m4)–C(19) | 1.491(3)   | C(33)–H(43a)  | 0.9500     |
| C(1)–C(2)   | 1.389(4)   | C(34)–C(35)   | 1.3865     |
| C(1)–C(6)   | 1.395(4)   | C(34)–H(44a)  | 0.9500     |
| C(2)–C(3)   | 1.396(4)   | C(35)–C(36)   | 1.3767     |
| C(2)–H(2a)  | 0.9500     | C(35)–H(35)   | 0.9500     |
| C(3)–C(4)   | 1.382(4)   | C(36)–H(46)   | 0.9500     |
| C(3)–H(3a)  | 0.9500     | N(8)–C(37)    | 1.433(11)  |
| C(4)–C(5)   | 1.383(4)   | N(8)–C(31)    | 1.469(12)  |
| C(4)–H(4a)  | 0.9500     | C(31)–C(37)#2 | 1.523(10)  |
| C(5)–C(6)   | 1.389(4)   | C(31)–H(31)   | 0.9500     |
| C(5)–H(5a)  | 0.9500     | C(37)–C(31)#2 | 1.523(10)  |
| C(6)–H(6a)  | 0.9500     | C(37)–H(37)   | 0.9500     |
| C(7)–C(12)  | 1.390(4)   |               |            |

<sup>a</sup>The estimated standard deviations of the least significant digits are given in parentheses.

**Table S5.** Bond Angles for [Fe(TPP)(CN)(Py)]·0.65Py<sup>a</sup>

| angle             | degree     | angle              | degree   |
|-------------------|------------|--------------------|----------|
| C(25)–Fe(1)–N(1)  | 87.74(9)   | C(4)–C(5)–H(5a)    | 119.9    |
| C(25)–Fe(1)–N(3)  | 92.41(9)   | C(6)–C(5)–H(5a)    | 119.9    |
| N(1)–Fe(1)–N(3)   | 179.80(9)  | C(5)–C(6)–C(1)     | 120.4(3) |
| C(25)–Fe(1)–N(4)  | 89.74(9)   | C(5)–C(6)–H(6a)    | 119.8    |
| N(1)–Fe(1)–N(4)   | 89.26(8)   | C(1)–C(6)–H(6a)    | 119.8    |
| N(3)–Fe(1)–N(4)   | 90.62(8)   | C(12)–C(7)–C(8)    | 118.5(3) |
| C(25)–Fe(1)–N(2)  | 92.05(9)   | C(12)–C(7)–C(m2)   | 120.5(3) |
| N(1)–Fe(1)–N(2)   | 90.51(8)   | C(8)–C(7)–C(m2)    | 120.9(2) |
| N(3)–Fe(1)–N(2)   | 89.60(8)   | C(9)–C(8)–C(7)     | 120.5(3) |
| N(4)–Fe(1)–N(2)   | 178.19(8)  | C(9)–C(8)–H(8a)    | 119.8    |
| C(25)–Fe(1)–N(6)  | 176.05(9)  | C(7)–C(8)–H(8a)    | 119.8    |
| N(1)–Fe(1)–N(6)   | 88.30(8)   | C(10)–C(9)–C(8)    | 120.3(3) |
| N(3)–Fe(1)–N(6)   | 91.54(8)   | C(10)–C(9)–H(9a)   | 119.9    |
| N(4)–Fe(1)–N(6)   | 90.22(8)   | C(8)–C(9)–H(9a)    | 119.9    |
| N(2)–Fe(1)–N(6)   | 87.98(8)   | C(11)–C(10)–C(9)   | 119.8(3) |
| C(a2)–N(1)–C(a1)  | 106.13(19) | C(11)–C(10)–H(10a) | 120.1    |
| C(a2)–N(1)–Fe(1)  | 126.47(16) | C(9)–C(10)–H(10a)  | 120.1    |
| C(a1)–N(1)–Fe(1)  | 126.98(16) | C(10)–C(11)–C(12)  | 120.1(3) |
| C(a3)–N(2)–C(a4)  | 105.91(19) | C(10)–C(11)–H(11a) | 120.0    |
| C(a3)–N(2)–Fe(1)  | 125.88(16) | C(12)–C(11)–H(11a) | 120.0    |
| C(a4)–N(2)–Fe(1)  | 127.67(16) | C(7)–C(12)–C(11)   | 120.8(3) |
| C(a5)–N(3)–C(a6)  | 105.65(19) | C(7)–C(12)–H(12a)  | 119.6    |
| C(a5)–N(3)–Fe(1)  | 127.43(16) | C(11)–C(12)–H(12a) | 119.6    |
| C(a6)–N(3)–Fe(1)  | 126.57(16) | C(18)–C(13)–C(14)  | 119.0(2) |
| C(a8)–N(4)–C(a7)  | 105.76(19) | C(18)–C(13)–C(m3)  | 120.5(2) |
| C(a8)–N(4)–Fe(1)  | 127.38(16) | C(14)–C(13)–C(m3)  | 120.4(2) |
| C(a7)–N(4)–Fe(1)  | 126.81(16) | C(15)–C(14)–C(13)  | 120.5(2) |
| C(26)–N(6)–C(30)  | 117.7(2)   | C(15)–C(14)–H(14a) | 119.8    |
| C(26)–N(6)–Fe(1)  | 121.77(18) | C(13)–C(14)–H(14a) | 119.8    |
| C(30)–N(6)–Fe(1)  | 120.16(17) | C(16)–C(15)–C(14)  | 120.0(2) |
| N(1)–C(a1)–C(m4)  | 125.1(2)   | C(16)–C(15)–H(15a) | 120.0    |
| N(1)–C(a1)–C(b1)  | 109.6(2)   | C(14)–C(15)–H(15a) | 120.0    |
| C(m4)–C(a1)–C(b1) | 124.8(2)   | C(15)–C(16)–C(17)  | 119.9(2) |
| N(1)–C(a2)–C(m1)  | 126.3(2)   | C(15)–C(16)–H(16a) | 120.0    |

**Table S5.** Continued

| angle             | degree   | angle              | degree   |
|-------------------|----------|--------------------|----------|
| N(1)–C(a2)–C(b2)  | 109.9(2) | C(17)–C(16)–H(16a) | 120.0    |
| C(m1)–C(a2)–C(b2) | 123.6(2) | C(16)–C(17)–C(18)  | 120.0(3) |
| N(2)–C(a3)–C(m1)  | 125.5(2) | C(16)–C(17)–H(17a) | 120.0    |
| N(2)–C(a3)–C(b3)  | 110.0(2) | C(18)–C(17)–H(17a) | 120.0    |
| C(m1)–C(a3)–C(b3) | 124.4(2) | C(13)–C(18)–C(17)  | 120.5(2) |
| N(2)–C(a4)–C(m2)  | 125.5(2) | C(13)–C(18)–H(18a) | 119.7    |
| N(2)–C(a4)–C(b4)  | 109.7(2) | C(17)–C(18)–H(18a) | 119.7    |
| C(m2)–C(a4)–C(b4) | 124.5(2) | C(24)–C(19)–C(20)  | 119.0(2) |
| N(3)–C(a5)–C(m2)  | 125.4(2) | C(24)–C(19)–C(m4)  | 122.1(2) |
| N(3)–C(a5)–C(b5)  | 109.8(2) | C(20)–C(19)–C(m4)  | 118.9(2) |
| C(m2)–C(a5)–C(b5) | 124.6(2) | C(21)–C(20)–C(19)  | 120.2(2) |
| N(3)–C(a6)–C(m3)  | 125.9(2) | C(21)–C(20)–H(20a) | 119.9    |
| N(3)–C(a6)–C(b6)  | 110.1(2) | C(19)–C(20)–H(20a) | 119.9    |
| C(m3)–C(a6)–C(b6) | 124.0(2) | C(22)–C(21)–C(20)  | 120.4(3) |
| N(4)–C(a7)–C(m3)  | 125.2(2) | C(22)–C(21)–H(21a) | 119.8    |
| N(4)–C(a7)–C(b7)  | 109.9(2) | C(20)–C(21)–H(21a) | 119.8    |
| C(m3)–C(a7)–C(b7) | 124.4(2) | C(23)–C(22)–C(21)  | 119.6(2) |
| N(4)–C(a8)–C(m4)  | 125.5(2) | C(23)–C(22)–H(22a) | 120.2    |
| N(4)–C(a8)–C(b8)  | 110.0(2) | C(21)–C(22)–H(22a) | 120.2    |
| C(m4)–C(a8)–C(b8) | 124.5(2) | C(22)–C(23)–C(24)  | 120.5(2) |
| C(b2)–C(b1)–C(a1) | 107.2(2) | C(22)–C(23)–H(23a) | 119.8    |
| C(b2)–C(b1)–H(b1) | 126.4    | C(24)–C(23)–H(23a) | 119.8    |
| C(a1)–C(b1)–H(b1) | 126.4    | C(23)–C(24)–C(19)  | 120.3(2) |
| C(b1)–C(b2)–C(a2) | 107.1(2) | C(23)–C(24)–H(24a) | 119.9    |
| C(b1)–C(b2)–H(b2) | 126.5    | C(19)–C(24)–H(24a) | 119.9    |
| C(a2)–C(b2)–H(b2) | 126.5    | N(5)–C(25)–Fe(1)   | 176.4(2) |
| C(b4)–C(b3)–C(a3) | 107.2(2) | N(6)–C(26)–C(27)   | 122.5(3) |
| C(b4)–C(b3)–H(b3) | 126.4    | N(6)–C(26)–H(26a)  | 118.7    |
| C(a3)–C(b3)–H(b3) | 126.4    | C(27)–C(26)–H(26a) | 118.7    |
| C(b3)–C(b4)–C(a4) | 107.2(2) | C(28)–C(27)–C(26)  | 119.0(3) |
| C(b3)–C(b4)–H(b4) | 126.4    | C(28)–C(27)–H(27a) | 120.5    |
| C(a4)–C(b4)–H(b4) | 126.4    | C(26)–C(27)–H(27a) | 120.5    |
| C(b6)–C(b5)–C(a5) | 107.3(2) | C(27)–C(28)–C(29)  | 119.1(3) |
| C(b6)–C(b5)–H(b5) | 126.3    | C(27)–C(28)–H(28a) | 120.4    |



**Table S5.** Continued

| angle             | degree   | angle               | degree    |
|-------------------|----------|---------------------|-----------|
| C(a5)–C(b5)–H(b5) | 126.3    | C(29)–C(28)–H(28a)  | 120.4     |
| C(b5)–C(b6)–C(a6) | 107.1(2) | C(28)–C(29)–C(30)   | 118.8(3)  |
| C(b5)–C(b6)–H(b6) | 126.4    | C(28)–C(29)–H(29a)  | 120.6     |
| C(a6)–C(b6)–H(b6) | 126.4    | C(30)–C(29)–H(29a)  | 120.6     |
| C(b8)–C(b7)–C(a7) | 107.2(2) | N(6)–C(30)–C(29)    | 122.9(3)  |
| C(b8)–C(b7)–H(b7) | 126.4    | N(6)–C(30)–H(30a)   | 118.5     |
| C(a7)–C(b7)–H(b7) | 126.4    | C(29)–C(30)–H(30a)  | 118.5     |
| C(b7)–C(b8)–C(a8) | 107.1(2) | C(32)#1–N(7)–C(36)  | 140(2)    |
| C(b7)–C(b8)–H(b8) | 126.5    | C(32)#1–N(7)–C(32)  | 101(2)    |
| C(a8)–C(b8)–H(b8) | 126.5    | C(36)–N(7)–C(32)    | 117.4     |
| C(a2)–C(m1)–C(a3) | 122.6(2) | C(36)–N(7)–N(7)#1   | 158.4(9)  |
| C(a2)–C(m1)–C(1)  | 118.3(2) | N(7)–C(32)–C(33)    | 121.9     |
| C(a3)–C(m1)–C(1)  | 119.1(2) | N(7)–C(32)–H(32)    | 119.0     |
| C(a4)–C(m2)–C(a5) | 122.9(2) | C(33)–C(32)–H(32)   | 119.0     |
| C(a4)–C(m2)–C(7)  | 118.0(2) | C(34)–C(33)–C(32)   | 119.7     |
| C(a5)–C(m2)–C(7)  | 118.8(2) | C(34)–C(33)–H(43a)  | 120.1     |
| C(a7)–C(m3)–C(a6) | 123.2(2) | C(32)–C(33)–H(43a)  | 120.1     |
| C(a7)–C(m3)–C(13) | 119.5(2) | C(33)–C(34)–C(35)   | 118.7     |
| C(a6)–C(m3)–C(13) | 117.1(2) | C(33)–C(34)–H(44a)  | 120.7     |
| C(a1)–C(m4)–C(a8) | 122.2(2) | C(35)–C(34)–H(44a)  | 120.7     |
| C(a1)–C(m4)–C(19) | 119.3(2) | C(36)–C(35)–C(34)   | 118.7     |
| C(a8)–C(m4)–C(19) | 118.5(2) | C(36)–C(35)–H(35)   | 120.7     |
| C(2)–C(1)–C(6)    | 119.1(2) | C(34)–C(35)–H(35)   | 120.7     |
| C(2)–C(1)–C(m1)   | 122.1(2) | N(7)–C(36)–C(35)    | 123.5     |
| C(6)–C(1)–C(m1)   | 118.8(2) | N(7)–C(36)–H(46)    | 118.3     |
| C(1)–C(2)–C(3)    | 120.2(3) | C(35)–C(36)–H(46)   | 118.3     |
| C(1)–C(2)–H(2a)   | 119.9    | C(37)–N(8)–C(31)    | 89.5(7)   |
| C(3)–C(2)–H(2a)   | 119.9    | N(8)–C(31)–C(37)#2  | 117.9(9)  |
| C(4)–C(3)–C(2)    | 120.2(3) | N(8)–C(31)–H(31)    | 121.0     |
| C(4)–C(3)–H(3a)   | 119.9    | C(37)#2–C(31)–H(31) | 121.0     |
| C(2)–C(3)–H(3a)   | 119.9    | N(8)–C(37)–C(31)#2  | 149.2(11) |
| C(3)–C(4)–C(5)    | 119.8(2) | N(8)–C(37)–H(37)    | 105.4     |
| C(3)–C(4)–H(4a)   | 120.1    | C(31)#2–C(37)–H(37) | 105.4     |
| C(5)–C(4)–H(4a)   | 120.1    |                     |           |

**Table S5.** Continued

| angle          | degree   | angle | degree |
|----------------|----------|-------|--------|
| C(4)–C(5)–C(6) | 120.2(3) |       |        |

<sup>a</sup>The estimated standard deviations of the least significant digits are given in parentheses.

**Table S6.** Anisotropic Displacement Parameters ( $\text{\AA}^2$ ) for  $[\text{Fe}(\text{TPP})(\text{CN})(\text{Py})]\cdot 0.65\text{Py}^a$ 

| atom  | $U_{11}$   | $U_{22}$   | $U_{33}$   | $U_{23}$    | $U_{13}$    | $U_{12}$    |
|-------|------------|------------|------------|-------------|-------------|-------------|
| Fe(1) | 0.0132(2)  | 0.0118(2)  | 0.0171(2)  | 0.0017(1)   | 0.0030(1)   | 0.0002(1)   |
| N(1)  | 0.0144(9)  | 0.0147(9)  | 0.0194(9)  | 0.0024(7)   | 0.0019(7)   | 0.0006(7)   |
| N(2)  | 0.0164(9)  | 0.0149(9)  | 0.0213(10) | 0.0021(8)   | 0.0039(8)   | 0.0002(7)   |
| N(3)  | 0.0160(9)  | 0.0137(9)  | 0.0189(9)  | 0.0013(7)   | 0.0039(7)   | 0.0013(7)   |
| N(4)  | 0.0152(9)  | 0.0138(9)  | 0.0188(9)  | 0.0016(7)   | 0.0035(7)   | -0.0012(7)  |
| N(5)  | 0.0256(11) | 0.0270(12) | 0.0289(12) | -0.0047(10) | 0.0013(9)   | -0.0035(9)  |
| N(6)  | 0.0220(10) | 0.0158(10) | 0.0208(10) | 0.0022(8)   | 0.0046(8)   | -0.0016(8)  |
| C(A1) | 0.0156(11) | 0.0171(11) | 0.0198(11) | 0.0011(9)   | 0.0038(9)   | 0.0000(9)   |
| C(A2) | 0.0176(11) | 0.0173(11) | 0.0200(11) | 0.0032(9)   | 0.0027(9)   | -0.0026(9)  |
| C(A3) | 0.0198(12) | 0.0144(11) | 0.0215(12) | 0.0027(9)   | 0.0031(9)   | 0.0006(9)   |
| C(A4) | 0.0177(11) | 0.0167(12) | 0.0236(12) | 0.0015(9)   | 0.0033(9)   | 0.0033(9)   |
| C(A5) | 0.0172(11) | 0.0173(11) | 0.0222(12) | -0.0017(9)  | 0.0054(9)   | 0.0003(9)   |
| C(A6) | 0.0195(11) | 0.0133(11) | 0.0186(11) | -0.0009(8)  | 0.0055(9)   | -0.0016(9)  |
| C(A7) | 0.0190(11) | 0.0120(10) | 0.0177(11) | 0.0006(8)   | 0.0023(9)   | -0.0009(9)  |
| C(A8) | 0.0153(10) | 0.0132(11) | 0.0210(11) | 0.0002(9)   | 0.0028(9)   | -0.0001(8)  |
| C(B1) | 0.0185(11) | 0.0243(13) | 0.0256(12) | 0.0071(10)  | 0.0078(10)  | 0.0030(10)  |
| C(B2) | 0.0193(12) | 0.0234(12) | 0.0259(12) | 0.0087(10)  | 0.0067(10)  | 0.0013(10)  |
| C(B3) | 0.0233(12) | 0.0159(11) | 0.0317(13) | 0.0067(10)  | 0.0065(10)  | 0.0040(10)  |
| C(B4) | 0.0195(12) | 0.0190(12) | 0.0333(14) | 0.0058(10)  | 0.0065(10)  | 0.0049(10)  |
| C(B5) | 0.0188(11) | 0.0187(12) | 0.0259(12) | -0.0001(9)  | 0.0083(9)   | 0.0009(9)   |
| C(B6) | 0.0206(12) | 0.0160(11) | 0.0224(11) | -0.0002(9)  | 0.0087(9)   | -0.0010(9)  |
| C(B7) | 0.0193(11) | 0.0149(11) | 0.0207(11) | 0.0018(9)   | 0.0020(9)   | 0.0003(9)   |
| C(B8) | 0.0165(11) | 0.0135(11) | 0.0240(12) | 0.0011(9)   | 0.0028(9)   | 0.0013(9)   |
| C(M1) | 0.0193(11) | 0.0164(11) | 0.0213(11) | 0.0045(9)   | 0.0026(9)   | 0.0002(9)   |
| C(M2) | 0.0172(11) | 0.0177(11) | 0.0250(12) | 0.0003(9)   | 0.0045(9)   | 0.0019(9)   |
| C(M3) | 0.0210(11) | 0.0129(11) | 0.0180(11) | 0.0001(9)   | 0.0040(9)   | -0.0005(9)  |
| C(M4) | 0.0156(11) | 0.0160(11) | 0.0217(11) | 0.0008(9)   | 0.0035(9)   | -0.0003(9)  |
| C(1)  | 0.0173(11) | 0.0169(11) | 0.0294(13) | 0.0060(10)  | 0.0076(10)  | 0.0028(9)   |
| C(2)  | 0.0265(13) | 0.0184(12) | 0.0280(13) | 0.0032(10)  | 0.0081(10)  | 0.0035(10)  |
| C(3)  | 0.0332(14) | 0.0203(13) | 0.0298(13) | 0.0082(10)  | 0.0130(11)  | 0.0067(11)  |
| C(4)  | 0.0260(13) | 0.0178(12) | 0.0438(16) | 0.0091(11)  | 0.0164(12)  | 0.0028(10)  |
| C(5)  | 0.0265(14) | 0.0242(14) | 0.0457(17) | 0.0060(12)  | 0.0027(12)  | -0.0069(11) |
| C(6)  | 0.0269(14) | 0.0273(14) | 0.0354(15) | 0.0104(11)  | -0.0001(11) | -0.0045(11) |
| C(7)  | 0.0197(12) | 0.0176(12) | 0.0372(14) | 0.0067(10)  | 0.0095(10)  | 0.0032(9)   |

**Table S6.** Continued

| atom  | $U_{11}$   | $U_{22}$   | $U_{33}$   | $U_{23}$    | $U_{13}$   | $U_{12}$    |
|-------|------------|------------|------------|-------------|------------|-------------|
| C(8)  | 0.0207(12) | 0.0192(12) | 0.0417(15) | 0.0069(11)  | 0.0066(11) | 0.0003(10)  |
| C(9)  | 0.0201(13) | 0.0228(13) | 0.0568(19) | 0.0118(13)  | 0.0064(12) | 0.0010(11)  |
| C(10) | 0.0255(15) | 0.0294(16) | 0.074(2)   | 0.0140(15)  | 0.0201(16) | 0.0103(12)  |
| C(11) | 0.0405(18) | 0.0369(17) | 0.056(2)   | 0.0043(14)  | 0.0266(16) | 0.0118(14)  |
| C(12) | 0.0327(15) | 0.0309(15) | 0.0408(16) | 0.0042(12)  | 0.0144(13) | 0.0082(12)  |
| C(13) | 0.0165(11) | 0.0159(11) | 0.0219(11) | 0.0032(9)   | 0.0066(9)  | 0.0018(9)   |
| C(14) | 0.0231(12) | 0.0187(12) | 0.0246(12) | 0.0015(10)  | 0.0051(10) | 0.0003(9)   |
| C(15) | 0.0251(13) | 0.0166(12) | 0.0335(14) | 0.0047(10)  | 0.0079(11) | -0.0007(10) |
| C(16) | 0.0292(13) | 0.0226(13) | 0.0319(14) | 0.0113(11)  | 0.0147(11) | 0.0052(10)  |
| C(17) | 0.0430(16) | 0.0267(14) | 0.0224(13) | 0.0022(10)  | 0.0127(11) | 0.0025(12)  |
| C(18) | 0.0364(14) | 0.0170(12) | 0.0253(13) | -0.0002(10) | 0.0096(11) | -0.0013(10) |
| C(19) | 0.0195(12) | 0.0185(11) | 0.0207(11) | 0.0065(9)   | 0.0060(9)  | 0.0038(9)   |
| C(20) | 0.0244(13) | 0.0198(12) | 0.0324(14) | 0.0025(10)  | 0.0099(11) | -0.0004(10) |
| C(21) | 0.0340(14) | 0.0197(12) | 0.0347(14) | 0.0020(11)  | 0.0129(12) | 0.0058(11)  |
| C(22) | 0.0280(13) | 0.0272(13) | 0.0294(13) | 0.0104(11)  | 0.0135(11) | 0.0128(11)  |
| C(23) | 0.0192(12) | 0.0298(14) | 0.0280(13) | 0.0085(11)  | 0.0079(10) | 0.0037(10)  |
| C(24) | 0.0206(12) | 0.0207(12) | 0.0260(12) | 0.0052(10)  | 0.0057(10) | 0.0023(10)  |
| C(25) | 0.0145(11) | 0.0173(11) | 0.0251(12) | 0.0047(10)  | 0.0037(9)  | 0.0008(9)   |
| C(26) | 0.0303(14) | 0.0222(13) | 0.0258(13) | -0.0019(10) | 0.0047(11) | 0.0039(11)  |
| C(27) | 0.0477(18) | 0.0255(14) | 0.0330(15) | -0.0084(12) | 0.0068(13) | 0.0038(13)  |
| C(28) | 0.0482(18) | 0.0267(15) | 0.0325(15) | -0.0100(12) | 0.0044(13) | -0.0117(13) |
| C(29) | 0.0291(14) | 0.0319(15) | 0.0317(14) | -0.0045(12) | 0.0028(12) | -0.0107(12) |
| C(30) | 0.0225(12) | 0.0226(12) | 0.0255(12) | -0.0013(10) | 0.0039(10) | -0.0034(10) |
| N(7)  | 0.121(6)   | 0.138(6)   | 0.046(4)   | -0.026(5)   | -0.001(5)  | -0.014(5)   |
| C(32) | 0.135(7)   | 0.150(6)   | 0.077(6)   | -0.028(6)   | 0.004(6)   | -0.014(6)   |
| C(33) | 0.122(6)   | 0.126(6)   | 0.085(6)   | -0.023(6)   | 0.003(5)   | -0.008(5)   |
| C(34) | 0.132(6)   | 0.112(6)   | 0.078(6)   | -0.002(5)   | -0.016(5)  | -0.009(5)   |
| C(35) | 0.114(6)   | 0.109(6)   | 0.076(5)   | 0.008(5)    | -0.023(5)  | -0.014(5)   |
| C(36) | 0.137(6)   | 0.146(6)   | 0.097(6)   | 0.008(6)    | 0.003(6)   | -0.001(6)   |
| N(8)  | 0.102(3)   | 0.070(2)   | 0.044(2)   | -0.020(2)   | 0.026(2)   | -0.016(2)   |
| C(31) | 0.102(3)   | 0.065(3)   | 0.044(2)   | -0.023(2)   | 0.027(2)   | -0.019(3)   |
| C(37) | 0.113(3)   | 0.086(3)   | 0.064(3)   | -0.013(2)   | 0.020(2)   | -0.009(3)   |
| C(39) | 0.102(3)   | 0.070(2)   | 0.044(2)   | -0.020(2)   | 0.026(2)   | -0.016(2)   |
| C(40) | 0.102(3)   | 0.065(3)   | 0.044(2)   | -0.023(2)   | 0.027(2)   | -0.019(3)   |

**Table S6.** Continued

| atom  | $U_{11}$ | $U_{22}$ | $U_{33}$ | $U_{23}$  | $U_{13}$ | $U_{12}$  |
|-------|----------|----------|----------|-----------|----------|-----------|
| C(38) | 0.113(3) | 0.086(3) | 0.064(3) | -0.013(2) | 0.020(2) | -0.009(3) |

<sup>a</sup>The estimated standard deviations of the least significant digits are given in parentheses. The anisotropic displacement factor exponent takes the form:  $-2 \pi [\text{h}^2 U_{11} + \dots + 2 \text{h k a}^* \text{b}^* U_{12}]$ .

**Table S7.** Hydrogen Atom Coordinates and Equivalent Isotropic Displacement Parameters ( $\text{\AA}^2$ ) for  $[\text{Fe}(\text{TPP})(\text{CN})(\text{Py})]\cdot 0.65\text{Py}^a$

| atom   | $x$    | $y$     | $z$    | $U(\text{eq})$ |
|--------|--------|---------|--------|----------------|
| H(B1)  | 0.9550 | 0.2018  | 0.7036 | 0.027          |
| H(B2)  | 0.8750 | 0.2973  | 0.6730 | 0.027          |
| H(B3)  | 0.5234 | 0.3873  | 0.7244 | 0.028          |
| H(B4)  | 0.3704 | 0.3475  | 0.7776 | 0.029          |
| H(B5)  | 0.3162 | 0.1661  | 0.9895 | 0.025          |
| H(B6)  | 0.4402 | 0.0988  | 1.0901 | 0.023          |
| H(B7)  | 0.8351 | 0.0423  | 1.1088 | 0.022          |
| H(B8)  | 0.9517 | 0.0561  | 0.9936 | 0.022          |
| H(2A)  | 0.6334 | 0.3633  | 0.5743 | 0.029          |
| H(3A)  | 0.6800 | 0.4506  | 0.5159 | 0.032          |
| H(4A)  | 0.7997 | 0.5096  | 0.6168 | 0.033          |
| H(5A)  | 0.8763 | 0.4807  | 0.7753 | 0.040          |
| H(6A)  | 0.8315 | 0.3935  | 0.8339 | 0.037          |
| H(8A)  | 0.2418 | 0.2557  | 0.7281 | 0.033          |
| H(9A)  | 0.0733 | 0.2882  | 0.7270 | 0.040          |
| H(10A) | 0.0274 | 0.3139  | 0.8725 | 0.050          |
| H(11A) | 0.1499 | 0.3072  | 1.0196 | 0.051          |
| H(12A) | 0.3188 | 0.2747  | 1.0216 | 0.041          |
| H(14A) | 0.5952 | -0.0089 | 1.0445 | 0.027          |
| H(15A) | 0.5597 | -0.0716 | 1.1623 | 0.030          |
| H(16A) | 0.5830 | -0.0426 | 1.3246 | 0.032          |
| H(17A) | 0.6449 | 0.0486  | 1.3699 | 0.036          |
| H(18A) | 0.6771 | 0.1121  | 1.2517 | 0.031          |
| H(20A) | 0.8903 | 0.0357  | 0.7750 | 0.030          |
| H(21A) | 1.0260 | -0.0128 | 0.7266 | 0.034          |
| H(22A) | 1.1915 | 0.0286  | 0.7478 | 0.033          |
| H(23A) | 1.2216 | 0.1180  | 0.8199 | 0.030          |
| H(24A) | 1.0857 | 0.1679  | 0.8654 | 0.027          |
| H(26A) | 0.5963 | 0.2945  | 1.0032 | 0.032          |
| H(27A) | 0.6748 | 0.3632  | 1.1149 | 0.043          |
| H(28A) | 0.8562 | 0.3616  | 1.1729 | 0.044          |
| H(29A) | 0.9540 | 0.2894  | 1.1198 | 0.038          |
| H(30A) | 0.8694 | 0.2234  | 1.0073 | 0.028          |
| H(32)  | 0.9812 | -0.0533 | 0.5016 | 0.148          |

**Table S7.** Continued

| atom   | $x$    | $y$     | $z$    | $U(\text{eq})$ |
|--------|--------|---------|--------|----------------|
| H(43A) | 0.8218 | -0.0644 | 0.5461 | 0.137          |
| H(44A) | 0.7209 | 0.0156  | 0.5625 | 0.136          |
| H(35)  | 0.7893 | 0.1063  | 0.5433 | 0.128          |
| H(46)  | 0.9482 | 0.1136  | 0.4986 | 0.156          |
| H(31)  | 0.6423 | 0.0533  | 0.5856 | 0.082          |
| H(37)  | 0.3600 | 0.0391  | 0.4697 | 0.105          |
| H(39)  | 0.4857 | 0.1144  | 0.4860 | 0.085          |
| H(40)  | 0.6423 | 0.0533  | 0.5856 | 0.082          |
| H(38)  | 0.3600 | 0.0391  | 0.4697 | 0.105          |

<sup>a</sup> $U(\text{eq})$  is defined as one third of the trace of the orthogonalized  $\mathbf{U}_{ij}$  tensor the estimated standard deviations of the least significant digits are given in parentheses.

**Table S8.** Complete Crystallographic Details for [Fe(TPP)(CN)(1-MeIm)]·1-MeIm·CHCl<sub>3</sub>

|                                                              |                                                                  |
|--------------------------------------------------------------|------------------------------------------------------------------|
| formula                                                      | C <sub>54</sub> H <sub>41</sub> Cl <sub>3</sub> FeN <sub>9</sub> |
| FW, amu                                                      | 978.16                                                           |
| <i>a</i> , Å                                                 | 20.7612(3)                                                       |
| <i>b</i> , Å                                                 | 9.7535(1)                                                        |
| <i>c</i> , Å                                                 | 26.5363(4)                                                       |
| $\beta$ , deg                                                | 121.109(1)                                                       |
| <i>V</i> , Å <sup>3</sup>                                    | 4600.67(11)                                                      |
| space group                                                  | P21/c                                                            |
| <i>Z</i>                                                     | 4                                                                |
| D <sub>c</sub> , g/cm <sup>3</sup>                           | 1.412                                                            |
| F(000)                                                       | 2020                                                             |
| $\mu$ , mm <sup>-1</sup>                                     | 0.552                                                            |
| crystal dimensions, mm                                       | 0.42 × 0.23 × 0.07                                               |
| radiation                                                    | MoK $\alpha$ , $\bar{\lambda}$ = 0.71073 Å                       |
| temperature, K                                               | 100(2)                                                           |
| diffractometer                                               | Bruker Apex CCD                                                  |
| $\theta$ range for collected data, deg                       | 1.15–34.35                                                       |
| index range                                                  | –32 ≤ <i>h</i> ≤ 23<br>–9 ≤ <i>k</i> ≤ 15<br>–39 ≤ <i>l</i> ≤ 42 |
| total data collected                                         | 79823                                                            |
| absorption correction                                        | Semi-empirical fromequiv                                         |
| relative transmission coefficients (I)                       | 0.962 and 0.858                                                  |
| unique data                                                  | 19164 ( <i>R</i> <sub>int</sub> = 0.031)                         |
| unique observed data [ <i>I</i> > 2 $\sigma$ ( <i>I</i> )]   | 13118                                                            |
| refinement method                                            | Full-matrix least-squares on F <sup>2</sup>                      |
| data/restraints/parameters                                   | 19164/0/606                                                      |
| goodness-of-fit (pased on <i>F</i> <sup>2</sup> )            | 1.111                                                            |
| final <i>R</i> indices [ <i>I</i> > 2 $\sigma$ ( <i>I</i> )] | <i>R</i> <sub>1</sub> = 0.0462, <i>wR</i> <sub>2</sub> = 0.1281  |
| final <i>R</i> indices (all data)                            | <i>R</i> <sub>1</sub> = 0.0765, <i>wR</i> <sub>2</sub> = 0.1380  |



**Table S9.** Atomic Coordinates and Equivalent Isotropic Displacement Parameters ( $\text{\AA}^2$ ) for  $[\text{Fe}(\text{TPP})(\text{CN})(1\text{-MeIm})]\cdot 1\text{-MeIm}\cdot \text{CHCl}_3^a$

| atom  | <i>x</i>    | <i>y</i>    | <i>z</i>    | <i>U</i> (eq) |
|-------|-------------|-------------|-------------|---------------|
| Fe(1) | 0.28494(1)  | 0.78715(2)  | 0.02497(1)  | 0.0102(1)     |
| N(1)  | 0.39374(6)  | 0.78304(12) | 0.05054(5)  | 0.0116(2)     |
| N(2)  | 0.25716(6)  | 0.73905(12) | −0.05667(5) | 0.0121(2)     |
| N(3)  | 0.17621(6)  | 0.79680(12) | −0.00082(5) | 0.0117(2)     |
| N(4)  | 0.31334(6)  | 0.82403(12) | 0.10788(5)  | 0.0121(2)     |
| N(5)  | 0.28177(6)  | 0.98782(12) | 0.00578(5)  | 0.0139(2)     |
| N(6)  | 0.24233(7)  | 1.19056(12) | −0.03510(5) | 0.0157(2)     |
| N(7)  | 0.28377(7)  | 0.48097(14) | 0.05269(5)  | 0.0200(3)     |
| N(8)  | 0.27580(7)  | 0.43456(16) | 0.29593(6)  | 0.0257(3)     |
| N(9)  | 0.28239(10) | 0.2151(2)   | 0.31728(9)  | 0.0510(5)     |
| C(a1) | 0.45469(8)  | 0.80098(14) | 0.10670(6)  | 0.0122(2)     |
| C(a2) | 0.42363(7)  | 0.76953(14) | 0.01506(6)  | 0.0122(2)     |
| C(a3) | 0.30605(8)  | 0.71232(14) | −0.07581(6) | 0.0134(3)     |
| C(a4) | 0.18621(8)  | 0.71197(15) | −0.10378(6) | 0.0132(3)     |
| C(a5) | 0.11563(8)  | 0.78016(14) | −0.05698(6) | 0.0126(2)     |
| C(a6) | 0.14657(7)  | 0.83387(14) | 0.03316(6)  | 0.0123(2)     |
| C(a7) | 0.26488(8)  | 0.83512(14) | 0.12855(6)  | 0.0121(2)     |
| C(a8) | 0.38458(8)  | 0.81485(14) | 0.15744(6)  | 0.0119(2)     |
| C(b1) | 0.52331(8)  | 0.80470(15) | 0.10560(6)  | 0.0145(3)     |
| C(b2) | 0.50404(8)  | 0.78667(15) | 0.04883(6)  | 0.0152(3)     |
| C(b3) | 0.26489(8)  | 0.66479(16) | −0.13583(6) | 0.0168(3)     |
| C(b4) | 0.19126(8)  | 0.66347(16) | −0.15294(6) | 0.0175(3)     |
| C(b5) | 0.04706(8)  | 0.81572(15) | −0.05881(6) | 0.0142(3)     |
| C(b6) | 0.06599(8)  | 0.85015(15) | −0.00357(6) | 0.0143(3)     |
| C(b7) | 0.30643(8)  | 0.83018(15) | 0.19187(6)  | 0.0142(3)     |
| C(b8) | 0.38008(8)  | 0.81681(15) | 0.20967(6)  | 0.0141(3)     |
| C(m1) | 0.38359(8)  | 0.73280(14) | −0.04402(6) | 0.0125(3)     |
| C(m2) | 0.11892(8)  | 0.73472(15) | −0.10532(6) | 0.0134(3)     |
| C(m3) | 0.18682(8)  | 0.84816(14) | 0.09423(6)  | 0.0124(2)     |
| C(m4) | 0.45206(8)  | 0.80843(14) | 0.15793(6)  | 0.0128(3)     |
| C(1)  | 0.42666(8)  | 0.71062(15) | −0.07431(6) | 0.0134(3)     |
| C(2)  | 0.45405(9)  | 0.58162(17) | −0.07577(7) | 0.0237(3)     |
| C(3)  | 0.49712(10) | 0.56355(19) | −0.10145(8) | 0.0290(4)     |
| C(4)  | 0.51187(9)  | 0.67297(19) | −0.12706(7) | 0.0231(3)     |

**Table S9.** Continued

| atom  | $x$         | $y$         | $z$         | $U(\text{eq})$ |
|-------|-------------|-------------|-------------|----------------|
| C(5)  | 0.48367(9)  | 0.80101(18) | -0.12654(6) | 0.0214(3)      |
| C(6)  | 0.44171(8)  | 0.81982(16) | -0.09993(6) | 0.0180(3)      |
| C(7)  | 0.04644(8)  | 0.71124(15) | -0.16209(6) | 0.0143(3)      |
| C(8)  | -0.00122(8) | 0.60426(16) | -0.16742(6) | 0.0187(3)      |
| C(9)  | -0.06909(9) | 0.58430(18) | -0.22011(7) | 0.0223(3)      |
| C(10) | -0.09004(9) | 0.67117(18) | -0.26732(7) | 0.0226(3)      |
| C(11) | -0.04276(9) | 0.77758(17) | -0.26220(6) | 0.0203(3)      |
| C(12) | 0.02519(8)  | 0.79747(16) | -0.21003(6) | 0.0172(3)      |
| C(13) | 0.14416(7)  | 0.87241(15) | 0.12473(6)  | 0.0129(3)      |
| C(14) | 0.09103(8)  | 0.77694(16) | 0.12014(7)  | 0.0180(3)      |
| C(15) | 0.05212(9)  | 0.79843(16) | 0.14896(7)  | 0.0203(3)      |
| C(16) | 0.06540(8)  | 0.91566(17) | 0.18285(6)  | 0.0202(3)      |
| C(17) | 0.11741(8)  | 1.01057(17) | 0.18778(6)  | 0.0191(3)      |
| C(18) | 0.15700(8)  | 0.98968(16) | 0.15886(6)  | 0.0161(3)      |
| C(19) | 0.52403(8)  | 0.80767(15) | 0.21596(6)  | 0.0129(3)      |
| C(20) | 0.56113(8)  | 0.68436(15) | 0.24031(6)  | 0.0175(3)      |
| C(21) | 0.62502(8)  | 0.68077(16) | 0.29607(6)  | 0.0197(3)      |
| C(22) | 0.65379(8)  | 0.80113(16) | 0.32806(6)  | 0.0181(3)      |
| C(23) | 0.61950(8)  | 0.92513(16) | 0.30351(6)  | 0.0169(3)      |
| C(24) | 0.55448(8)  | 0.92814(15) | 0.24788(6)  | 0.0156(3)      |
| C(25) | 0.28587(7)  | 0.59593(15) | 0.04219(6)  | 0.0134(3)      |
| C(26) | 0.34109(9)  | 1.07874(17) | 0.03042(8)  | 0.0269(4)      |
| C(27) | 0.31703(9)  | 1.20367(17) | 0.00548(8)  | 0.0260(4)      |
| C(28) | 0.22328(8)  | 1.05971(15) | -0.03384(6) | 0.0153(3)      |
| C(29) | 0.19211(9)  | 1.29906(16) | -0.07329(7) | 0.0205(3)      |
| C(30) | 0.26906(12) | 0.5636(2)   | 0.26556(9)  | 0.0362(4)      |
| C(31) | 0.28600(9)  | 0.4194(2)   | 0.35105(8)  | 0.0354(5)      |
| C(32) | 0.29017(9)  | 0.2890(2)   | 0.36468(7)  | 0.0275(4)      |
| C(33) | 0.27252(9)  | 0.30417(16) | 0.27405(7)  | 0.0203(3)      |
| C(34) | 0.14203(9)  | 0.36611(17) | 0.05029(7)  | 0.0215(3)      |
| Cl(1) | 0.13120(3)  | 0.19128(4)  | 0.03148(2)  | 0.0311(1)      |
| Cl(2) | 0.07682(2)  | 0.46734(5)  | -0.00922(2) | 0.0314(1)      |
| Cl(3) | 0.13157(3)  | 0.39090(5)  | 0.11184(2)  | 0.0306(1)      |

<sup>a</sup> $U(\text{eq})$  is defined as one third of the trace of the orthogonalized  $\mathbf{U}_{ij}$  tensor. The estimated standard deviations of the least significant digits are given in parentheses.

**Table S10.** Bond Lengths for [Fe(TPP)(CN)(1-MeIm)]·1-MeIm·CHCl<sub>3</sub><sup>a</sup>

| bond        | length (Å) | bond        | length (Å) |
|-------------|------------|-------------|------------|
| Fe(1)–C(25) | 1.9179(15) | C(2)–H(29)  | 0.9500     |
| Fe(1)–N(2)  | 1.9889(11) | C(3)–C(4)   | 1.382(2)   |
| Fe(1)–N(3)  | 1.9941(12) | C(3)–H(30)  | 0.9500     |
| Fe(1)–N(4)  | 1.9943(11) | C(4)–C(5)   | 1.382(2)   |
| Fe(1)–N(1)  | 1.9952(11) | C(4)–H(31)  | 0.9500     |
| Fe(1)–N(5)  | 2.0149(12) | C(5)–C(6)   | 1.388(2)   |
| N(1)–C(a2)  | 1.3758(17) | C(5)–H(32)  | 0.9500     |
| N(1)–C(a1)  | 1.3800(17) | C(6)–H(33)  | 0.9500     |
| N(2)–C(a3)  | 1.3742(17) | C(7)–C(12)  | 1.393(2)   |
| N(2)–C(a4)  | 1.3782(17) | C(7)–C(8)   | 1.394(2)   |
| N(3)–C(a5)  | 1.3757(17) | C(8)–C(9)   | 1.394(2)   |
| N(3)–C(a6)  | 1.3768(17) | C(8)–H(18)  | 0.9500     |
| N(4)–C(a7)  | 1.3763(17) | C(9)–C(10)  | 1.383(2)   |
| N(4)–C(a8)  | 1.3839(17) | C(9)–H(19)  | 0.9500     |
| N(5)–C(28)  | 1.3237(18) | C(10)–C(11) | 1.386(2)   |
| N(5)–C(26)  | 1.378(2)   | C(10)–H(20) | 0.9500     |
| N(6)–C(28)  | 1.3416(19) | C(11)–C(12) | 1.388(2)   |
| N(6)–C(27)  | 1.362(2)   | C(11)–H(21) | 0.9500     |
| N(6)–C(29)  | 1.4635(19) | C(12)–H(22) | 0.9500     |
| N(7)–C(25)  | 1.1616(19) | C(13)–C(18) | 1.396(2)   |
| N(8)–C(31)  | 1.373(2)   | C(13)–C(14) | 1.400(2)   |
| N(8)–C(33)  | 1.385(2)   | C(14)–C(15) | 1.385(2)   |
| N(8)–C(30)  | 1.462(2)   | C(14)–H(11) | 0.9500     |
| N(9)–C(33)  | 1.367(2)   | C(15)–C(16) | 1.391(2)   |
| N(9)–C(32)  | 1.385(3)   | C(15)–H(10) | 0.9500     |
| C(a1)–C(m4) | 1.3901(19) | C(16)–C(17) | 1.376(2)   |
| C(a1)–C(b1) | 1.4405(19) | C(16)–H(9)  | 0.9500     |
| C(a2)–C(m1) | 1.3894(19) | C(17)–C(18) | 1.399(2)   |
| C(a2)–C(b2) | 1.4395(19) | C(17)–H(8)  | 0.9500     |
| C(a3)–C(m1) | 1.3927(19) | C(18)–H(7)  | 0.9500     |
| C(a3)–C(b3) | 1.4407(19) | C(19)–C(20) | 1.394(2)   |
| C(a4)–C(m2) | 1.3942(19) | C(19)–C(24) | 1.394(2)   |
| C(a4)–C(b4) | 1.4414(19) | C(20)–C(21) | 1.386(2)   |
| C(a5)–C(m2) | 1.3917(19) | C(20)–H(44) | 0.9500     |

**Table S10.** Continued

| bond        | length (Å) | bond         | length (Å) |
|-------------|------------|--------------|------------|
| C(a5)–C(b5) | 1.442(2)   | C(21)–C(22)  | 1.390(2)   |
| C(a6)–C(m3) | 1.3945(18) | C(21)–H(43)  | 0.9500     |
| C(a6)–C(b6) | 1.4454(19) | C(22)–C(23)  | 1.384(2)   |
| C(a7)–C(m3) | 1.3953(19) | C(22)–H(42)  | 0.9500     |
| C(a7)–C(b7) | 1.4395(18) | C(23)–C(24)  | 1.3939(19) |
| C(a8)–C(m4) | 1.3957(19) | C(23)–H(41)  | 0.9500     |
| C(a8)–C(b8) | 1.4368(19) | C(24)–H(40)  | 0.9500     |
| C(b1)–C(b2) | 1.3555(19) | C(26)–C(27)  | 1.353(2)   |
| C(b1)–H(36) | 0.9500     | C(26)–H(49)  | 0.9500     |
| C(b2)–H(35) | 0.9500     | C(27)–H(48)  | 0.9500     |
| C(b3)–C(b4) | 1.351(2)   | C(28)–H(46)  | 0.9500     |
| C(b3)–H(25) | 0.9500     | C(29)–H(47a) | 0.9800     |
| C(b4)–H(24) | 0.9500     | C(29)–H(47b) | 0.9800     |
| C(b5)–C(b6) | 1.3493(19) | C(29)–H(47C) | 0.9800     |
| C(b5)–H(14) | 0.9500     | C(30)–H(50a) | 0.9800     |
| C(b6)–H(13) | 0.9500     | C(30)–H(50b) | 0.9800     |
| C(b7)–C(b8) | 1.354(2)   | C(30)–H(50C) | 0.9800     |
| C(b7)–H(3)  | 0.9500     | C(31)–C(32)  | 1.313(3)   |
| C(b8)–H(2)  | 0.9500     | C(31)–H(51)  | 0.9500     |
| C(m1)–C(1)  | 1.4952(19) | C(32)–H(52)  | 0.9500     |
| C(m2)–C(7)  | 1.4979(19) | C(33)–H(53)  | 0.9500     |
| C(m3)–C(13) | 1.4956(19) | C(34)–Cl(1)  | 1.7582(17) |
| C(m4)–C(19) | 1.4921(19) | C(34)–Cl(2)  | 1.7584(16) |
| C(1)–C(6)   | 1.383(2)   | C(34)–Cl(3)  | 1.7722(16) |
| C(1)–C(2)   | 1.389(2)   | C(34)–H(54)  | 1.0000     |
| C(2)–C(3)   | 1.387(2)   |              |            |

<sup>a</sup>The estimated standard deviations of the least significant digits are given in parentheses.

**Table S11.** Bond Angles for [Fe(TPP)(CN)(1-MeIm)]·1-MeIm·CHCl<sub>3</sub><sup>a</sup>

| angle            | degree     | angle             | degree     |
|------------------|------------|-------------------|------------|
| C(25)–Fe(1)–N(2) | 89.52(5)   | C(4)–C(3)–H(30)   | 119.8      |
| C(25)–Fe(1)–N(3) | 89.89(5)   | C(2)–C(3)–H(30)   | 119.8      |
| N(2)–Fe(1)–N(3)  | 89.86(5)   | C(3)–C(4)–C(5)    | 119.36(14) |
| C(25)–Fe(1)–N(4) | 87.24(5)   | C(3)–C(4)–H(31)   | 120.3      |
| N(2)–Fe(1)–N(4)  | 176.75(5)  | C(5)–C(4)–H(31)   | 120.3      |
| N(3)–Fe(1)–N(4)  | 90.41(5)   | C(4)–C(5)–C(6)    | 120.31(15) |
| C(25)–Fe(1)–N(1) | 91.67(5)   | C(4)–C(5)–H(32)   | 119.8      |
| N(2)–Fe(1)–N(1)  | 90.33(5)   | C(6)–C(5)–H(32)   | 119.8      |
| N(3)–Fe(1)–N(1)  | 178.43(5)  | C(1)–C(6)–C(5)    | 120.57(15) |
| N(4)–Fe(1)–N(1)  | 89.49(5)   | C(1)–C(6)–H(33)   | 119.7      |
| C(25)–Fe(1)–N(5) | 178.88(6)  | C(5)–C(6)–H(33)   | 119.7      |
| N(2)–Fe(1)–N(5)  | 90.03(5)   | C(12)–C(7)–C(8)   | 119.07(13) |
| N(3)–Fe(1)–N(5)  | 89.08(5)   | C(12)–C(7)–C(m2)  | 120.38(13) |
| N(4)–Fe(1)–N(5)  | 93.22(5)   | C(8)–C(7)–C(m2)   | 120.54(13) |
| N(1)–Fe(1)–N(5)  | 89.36(5)   | C(9)–C(8)–C(7)    | 120.21(14) |
| C(a2)–N(1)–C(a1) | 105.38(11) | C(9)–C(8)–H(18)   | 119.9      |
| C(a2)–N(1)–Fe(1) | 126.94(9)  | C(7)–C(8)–H(18)   | 119.9      |
| C(a1)–N(1)–Fe(1) | 127.58(9)  | C(10)–C(9)–C(8)   | 120.32(15) |
| C(a3)–N(2)–C(a4) | 106.01(11) | C(10)–C(9)–H(19)  | 119.8      |
| C(a3)–N(2)–Fe(1) | 126.41(9)  | C(8)–C(9)–H(19)   | 119.8      |
| C(a4)–N(2)–Fe(1) | 127.28(9)  | C(9)–C(10)–C(11)  | 119.63(14) |
| C(a5)–N(3)–C(a6) | 105.83(11) | C(9)–C(10)–H(20)  | 120.2      |
| C(a5)–N(3)–Fe(1) | 127.26(9)  | C(11)–C(10)–H(20) | 120.2      |
| C(a6)–N(3)–Fe(1) | 126.68(9)  | C(10)–C(11)–C(12) | 120.39(14) |
| C(a7)–N(4)–C(a8) | 105.60(11) | C(10)–C(11)–H(21) | 119.8      |
| C(a7)–N(4)–Fe(1) | 126.40(9)  | C(12)–C(11)–H(21) | 119.8      |
| C(a8)–N(4)–Fe(1) | 126.74(9)  | C(11)–C(12)–C(7)  | 120.38(14) |
| C(28)–N(5)–C(26) | 105.32(13) | C(11)–C(12)–H(22) | 119.8      |
| C(28)–N(5)–Fe(1) | 127.74(10) | C(7)–C(12)–H(22)  | 119.8      |
| C(26)–N(5)–Fe(1) | 126.92(10) | C(18)–C(13)–C(14) | 118.62(13) |
| C(28)–N(6)–C(27) | 107.42(12) | C(18)–C(13)–C(m3) | 120.83(12) |
| C(28)–N(6)–C(29) | 126.25(13) | C(14)–C(13)–C(m3) | 120.54(12) |
| C(27)–N(6)–C(29) | 126.32(13) | C(15)–C(14)–C(13) | 120.61(14) |
| C(31)–N(8)–C(33) | 107.15(16) | C(15)–C(14)–H(11) | 119.7      |

**Table S11.** Continued

| angle             | degree     | angle             | degree     |
|-------------------|------------|-------------------|------------|
| C(31)–N(8)–C(30)  | 126.72(17) | C(13)–C(14)–H(11) | 119.7      |
| C(33)–N(8)–C(30)  | 126.13(14) | C(14)–C(15)–C(16) | 120.25(14) |
| C(33)–N(9)–C(32)  | 109.16(18) | C(14)–C(15)–H(10) | 119.9      |
| N(1)–C(a1)–C(m4)  | 125.84(12) | C(16)–C(15)–H(10) | 119.9      |
| N(1)–C(a1)–C(b1)  | 110.23(11) | C(17)–C(16)–C(15) | 119.86(13) |
| C(m4)–C(a1)–C(b1) | 123.88(12) | C(17)–C(16)–H(9)  | 120.1      |
| N(1)–C(a2)–C(m1)  | 125.34(12) | C(15)–C(16)–H(9)  | 120.1      |
| N(1)–C(a2)–C(b2)  | 110.54(11) | C(16)–C(17)–C(18) | 120.29(14) |
| C(m1)–C(a2)–C(b2) | 123.91(13) | C(16)–C(17)–H(8)  | 119.9      |
| N(2)–C(a3)–C(m1)  | 126.31(12) | C(18)–C(17)–H(8)  | 119.9      |
| N(2)–C(a3)–C(b3)  | 109.88(12) | C(13)–C(18)–C(17) | 120.37(14) |
| C(m1)–C(a3)–C(b3) | 123.75(13) | C(13)–C(18)–H(7)  | 119.8      |
| N(2)–C(a4)–C(m2)  | 125.55(12) | C(17)–C(18)–H(7)  | 119.8      |
| N(2)–C(a4)–C(b4)  | 109.89(12) | C(20)–C(19)–C(24) | 118.49(13) |
| C(m2)–C(a4)–C(b4) | 124.47(13) | C(20)–C(19)–C(m4) | 120.10(13) |
| N(3)–C(a5)–C(m2)  | 125.69(12) | C(24)–C(19)–C(m4) | 121.38(13) |
| N(3)–C(a5)–C(b5)  | 110.01(12) | C(21)–C(20)–C(19) | 120.75(14) |
| C(m2)–C(a5)–C(b5) | 124.30(12) | C(21)–C(20)–H(44) | 119.6      |
| N(3)–C(a6)–C(m3)  | 125.81(12) | C(19)–C(20)–H(44) | 119.6      |
| N(3)–C(a6)–C(b6)  | 109.91(11) | C(20)–C(21)–C(22) | 120.19(14) |
| C(m3)–C(a6)–C(b6) | 124.23(12) | C(20)–C(21)–H(43) | 119.9      |
| N(4)–C(a7)–C(m3)  | 126.06(12) | C(22)–C(21)–H(43) | 119.9      |
| N(4)–C(a7)–C(b7)  | 110.00(12) | C(23)–C(22)–C(21) | 119.77(14) |
| C(m3)–C(a7)–C(b7) | 123.94(12) | C(23)–C(22)–H(42) | 120.1      |
| N(4)–C(a8)–C(m4)  | 125.93(12) | C(21)–C(22)–H(42) | 120.1      |
| N(4)–C(a8)–C(b8)  | 110.21(12) | C(22)–C(23)–C(24) | 119.88(14) |
| C(m4)–C(a8)–C(b8) | 123.84(12) | C(22)–C(23)–H(41) | 120.1      |
| C(b2)–C(b1)–C(a1) | 107.00(12) | C(24)–C(23)–H(41) | 120.1      |
| C(b2)–C(b1)–H(36) | 126.5      | C(23)–C(24)–C(19) | 120.84(14) |
| C(a1)–C(b1)–H(36) | 126.5      | C(23)–C(24)–H(40) | 119.6      |
| C(b1)–C(b2)–C(a2) | 106.76(12) | C(19)–C(24)–H(40) | 119.6      |
| C(b1)–C(b2)–H(35) | 126.6      | N(7)–C(25)–Fe(1)  | 177.18(13) |
| C(a2)–C(b2)–H(35) | 126.6      | C(27)–C(26)–N(5)  | 109.51(14) |
| C(b4)–C(b3)–C(a3) | 107.23(12) | C(27)–C(26)–H(49) | 125.2      |

**Table S11.** Continued

| angle             | degree     | angle               | degree     |
|-------------------|------------|---------------------|------------|
| C(b4)–C(b3)–H(25) | 126.4      | N(5)–C(26)–H(49)    | 125.2      |
| C(a3)–C(b3)–H(25) | 126.4      | C(26)–C(27)–N(6)    | 106.50(14) |
| C(b3)–C(b4)–C(a4) | 106.95(12) | C(26)–C(27)–H(48)   | 126.8      |
| C(b3)–C(b4)–H(24) | 126.5      | N(6)–C(27)–H(48)    | 126.8      |
| C(a4)–C(b4)–H(24) | 126.5      | N(5)–C(28)–N(6)     | 111.25(13) |
| C(b6)–C(b5)–C(a5) | 107.16(12) | N(5)–C(28)–H(46)    | 124.4      |
| C(b6)–C(b5)–H(14) | 126.4      | N(6)–C(28)–H(46)    | 124.4      |
| C(a5)–C(b5)–H(14) | 126.4      | N(6)–C(29)–H(47a)   | 109.5      |
| C(b5)–C(b6)–C(a6) | 106.93(12) | N(6)–C(29)–H(47b)   | 109.5      |
| C(b5)–C(b6)–H(13) | 126.5      | H(47a)–C(29)–H(47b) | 109.5      |
| C(a6)–C(b6)–H(13) | 126.5      | N(6)–C(29)–H(47C)   | 109.5      |
| C(b8)–C(b7)–C(a7) | 107.35(12) | H(47a)–C(29)–H(47C) | 109.5      |
| C(b8)–C(b7)–H(3)  | 126.3      | H(47b)–C(29)–H(47C) | 109.5      |
| C(a7)–C(b7)–H(3)  | 126.3      | N(8)–C(30)–H(50a)   | 109.5      |
| C(b7)–C(b8)–C(a8) | 106.82(12) | N(8)–C(30)–H(50b)   | 109.5      |
| C(b7)–C(b8)–H(2)  | 126.6      | H(50a)–C(30)–H(50b) | 109.5      |
| C(a8)–C(b8)–H(2)  | 126.6      | N(8)–C(30)–H(50C)   | 109.5      |
| C(a2)–C(m1)–C(a3) | 123.43(12) | H(50a)–C(30)–H(50C) | 109.5      |
| C(a2)–C(m1)–C(1)  | 117.94(12) | H(50b)–C(30)–H(50C) | 109.5      |
| C(a3)–C(m1)–C(1)  | 118.61(12) | C(32)–C(31)–N(8)    | 110.47(18) |
| C(a5)–C(m2)–C(a4) | 123.32(12) | C(32)–C(31)–H(51)   | 124.8      |
| C(a5)–C(m2)–C(7)  | 118.26(12) | N(8)–C(31)–H(51)    | 124.8      |
| C(a4)–C(m2)–C(7)  | 118.42(12) | C(31)–C(32)–N(9)    | 107.08(16) |
| C(a6)–C(m3)–C(a7) | 123.09(12) | C(31)–C(32)–H(52)   | 126.5      |
| C(a6)–C(m3)–C(13) | 118.55(12) | N(9)–C(32)–H(52)    | 126.5      |
| C(a7)–C(m3)–C(13) | 118.30(11) | N(9)–C(33)–N(8)     | 106.13(15) |
| C(a1)–C(m4)–C(a8) | 122.65(12) | N(9)–C(33)–H(53)    | 126.9      |
| C(a1)–C(m4)–C(19) | 119.00(12) | N(8)–C(33)–H(53)    | 126.9      |
| C(a8)–C(m4)–C(19) | 118.35(12) | Cl(1)–C(34)–Cl(2)   | 111.32(9)  |
| C(6)–C(1)–C(2)    | 118.95(13) | Cl(1)–C(34)–Cl(3)   | 109.59(9)  |
| C(6)–C(1)–C(m1)   | 120.16(13) | Cl(2)–C(34)–Cl(3)   | 110.30(9)  |
| C(2)–C(1)–C(m1)   | 120.87(13) | Cl(1)–C(34)–H(54)   | 108.5      |
| C(3)–C(2)–C(1)    | 120.38(15) | Cl(2)–C(34)–H(54)   | 108.5      |
| C(3)–C(2)–H(29)   | 119.8      | Cl(3)–C(34)–H(54)   | 108.5      |

**Table S11.** Continued

| angle           | degree     | angle | degree |
|-----------------|------------|-------|--------|
| C(1)–C(2)–H(29) | 119.8      |       |        |
| C(4)–C(3)–C(2)  | 120.41(16) |       |        |

<sup>a</sup>The estimated standard deviations of the least significant digits are given in parentheses.



**Table S12.** Anisotropic Displacement Parameters ( $\text{\AA}^2$ ) for  $[\text{Fe}(\text{TPP})(\text{CN})(1\text{-MeIm})]\cdot 1\text{-MeIm}\cdot \text{CHCl}_3^a$ 

| atom  | $U_{11}$   | $U_{22}$   | $U_{33}$   | $U_{23}$   | $U_{13}$  | $U_{12}$   |
|-------|------------|------------|------------|------------|-----------|------------|
| Fe(1) | 0.0093(1)  | 0.0119(1)  | 0.0094(1)  | -0.0004(1) | 0.0047(1) | -0.0001(1) |
| N(1)  | 0.0106(5)  | 0.0134(5)  | 0.0106(5)  | -0.0008(4) | 0.0053(4) | -0.0007(4) |
| N(2)  | 0.0112(5)  | 0.0148(6)  | 0.0104(5)  | -0.0012(4) | 0.0056(4) | 0.0001(4)  |
| N(3)  | 0.0103(5)  | 0.0138(5)  | 0.0105(5)  | -0.0003(4) | 0.0051(4) | 0.0003(4)  |
| N(4)  | 0.0101(5)  | 0.0151(5)  | 0.0112(5)  | -0.0007(4) | 0.0054(4) | 0.0001(4)  |
| N(5)  | 0.0138(5)  | 0.0141(6)  | 0.0130(5)  | -0.0009(4) | 0.0064(4) | -0.0004(4) |
| N(6)  | 0.0173(6)  | 0.0135(6)  | 0.0160(5)  | 0.0009(4)  | 0.0083(5) | 0.0016(5)  |
| N(7)  | 0.0212(6)  | 0.0188(6)  | 0.0183(6)  | 0.0022(5)  | 0.0090(5) | -0.0003(5) |
| N(8)  | 0.0205(7)  | 0.0342(8)  | 0.0234(7)  | -0.0051(6) | 0.0122(6) | -0.0046(6) |
| N(9)  | 0.0327(10) | 0.0719(15) | 0.0454(11) | 0.0095(10) | 0.0180(9) | -0.0050(9) |
| C(A1) | 0.0102(6)  | 0.0133(6)  | 0.0119(5)  | 0.0005(5)  | 0.0048(5) | 0.0002(5)  |
| C(A2) | 0.0106(6)  | 0.0133(6)  | 0.0130(6)  | 0.0003(5)  | 0.0063(5) | -0.0002(5) |
| C(A3) | 0.0133(6)  | 0.0153(6)  | 0.0115(5)  | 0.0002(5)  | 0.0064(5) | 0.0010(5)  |
| C(A4) | 0.0112(6)  | 0.0164(7)  | 0.0107(5)  | -0.0008(5) | 0.0046(5) | -0.0008(5) |
| C(A5) | 0.0111(6)  | 0.0131(6)  | 0.0123(5)  | -0.0001(5) | 0.0052(5) | -0.0006(5) |
| C(A6) | 0.0111(6)  | 0.0129(6)  | 0.0132(6)  | -0.0007(5) | 0.0066(5) | -0.0002(5) |
| C(A7) | 0.0134(6)  | 0.0114(6)  | 0.0124(5)  | -0.0009(5) | 0.0073(5) | -0.0008(5) |
| C(A8) | 0.0111(6)  | 0.0135(6)  | 0.0107(5)  | -0.0012(5) | 0.0053(5) | -0.0004(5) |
| C(B1) | 0.0097(6)  | 0.0192(7)  | 0.0130(6)  | -0.0004(5) | 0.0048(5) | 0.0000(5)  |
| C(B2) | 0.0118(6)  | 0.0198(7)  | 0.0153(6)  | 0.0000(5)  | 0.0079(5) | -0.0002(5) |
| C(B3) | 0.0172(7)  | 0.0223(7)  | 0.0129(6)  | -0.0035(5) | 0.0092(5) | 0.0004(6)  |
| C(B4) | 0.0165(7)  | 0.0235(8)  | 0.0117(6)  | -0.0042(5) | 0.0067(5) | -0.0012(6) |
| C(B5) | 0.0101(6)  | 0.0172(7)  | 0.0135(6)  | 0.0003(5)  | 0.0048(5) | 0.0001(5)  |
| C(B6) | 0.0104(6)  | 0.0171(7)  | 0.0150(6)  | -0.0010(5) | 0.0062(5) | 0.0013(5)  |
| C(B7) | 0.0147(6)  | 0.0169(7)  | 0.0123(6)  | -0.0001(5) | 0.0079(5) | -0.0006(5) |
| C(B8) | 0.0138(6)  | 0.0173(7)  | 0.0098(5)  | -0.0006(5) | 0.0051(5) | -0.0007(5) |
| C(M1) | 0.0138(6)  | 0.0132(6)  | 0.0126(6)  | 0.0006(5)  | 0.0082(5) | 0.0003(5)  |
| C(M2) | 0.0113(6)  | 0.0156(7)  | 0.0111(5)  | 0.0008(5)  | 0.0042(5) | -0.0008(5) |
| C(M3) | 0.0124(6)  | 0.0126(6)  | 0.0130(6)  | -0.0018(5) | 0.0072(5) | -0.0010(5) |
| C(M4) | 0.0108(6)  | 0.0145(6)  | 0.0110(5)  | -0.0007(5) | 0.0041(5) | -0.0009(5) |
| C(1)  | 0.0112(6)  | 0.0171(7)  | 0.0121(5)  | -0.0008(5) | 0.0062(5) | -0.0004(5) |
| C(2)  | 0.0315(9)  | 0.0183(7)  | 0.0326(8)  | 0.0007(7)  | 0.0246(8) | 0.0014(7)  |
| C(3)  | 0.0347(9)  | 0.0245(9)  | 0.0394(10) | -0.0030(8) | 0.0273(8) | 0.0056(7)  |
| C(4)  | 0.0178(7)  | 0.0372(10) | 0.0196(7)  | -0.0058(7) | 0.0134(6) | -0.0034(7) |

**Table S12.** Continued

| atom  | $U_{11}$   | $U_{22}$   | $U_{33}$   | $U_{23}$   | $U_{13}$  | $U_{12}$   |
|-------|------------|------------|------------|------------|-----------|------------|
| C(5)  | 0.0188(7)  | 0.0308(9)  | 0.0157(6)  | 0.0017(6)  | 0.0097(6) | -0.0049(6) |
| C(6)  | 0.0171(7)  | 0.0201(7)  | 0.0166(6)  | 0.0020(6)  | 0.0086(6) | 0.0007(6)  |
| C(7)  | 0.0107(6)  | 0.0196(7)  | 0.0113(5)  | -0.0031(5) | 0.0049(5) | 0.0004(5)  |
| C(8)  | 0.0172(7)  | 0.0215(7)  | 0.0152(6)  | -0.0009(6) | 0.0068(6) | -0.0018(6) |
| C(9)  | 0.0171(7)  | 0.0271(8)  | 0.0197(7)  | -0.0077(6) | 0.0074(6) | -0.0077(6) |
| C(10) | 0.0137(7)  | 0.0338(9)  | 0.0153(6)  | -0.0069(6) | 0.0041(6) | 0.0021(6)  |
| C(11) | 0.0171(7)  | 0.0294(9)  | 0.0115(6)  | -0.0001(6) | 0.0052(5) | 0.0054(6)  |
| C(12) | 0.0146(7)  | 0.0225(8)  | 0.0138(6)  | -0.0004(5) | 0.0068(5) | 0.0006(6)  |
| C(13) | 0.0113(6)  | 0.0153(6)  | 0.0117(5)  | 0.0010(5)  | 0.0055(5) | 0.0020(5)  |
| C(14) | 0.0181(7)  | 0.0186(7)  | 0.0207(7)  | -0.0019(6) | 0.0125(6) | -0.0013(6) |
| C(15) | 0.0188(7)  | 0.0221(8)  | 0.0257(7)  | 0.0021(6)  | 0.0155(6) | -0.0004(6) |
| C(16) | 0.0191(7)  | 0.0287(8)  | 0.0174(6)  | 0.0036(6)  | 0.0126(6) | 0.0057(6)  |
| C(17) | 0.0204(7)  | 0.0223(8)  | 0.0158(6)  | -0.0027(6) | 0.0102(6) | 0.0031(6)  |
| C(18) | 0.0143(6)  | 0.0192(7)  | 0.0145(6)  | -0.0018(5) | 0.0073(5) | -0.0003(5) |
| C(19) | 0.0097(6)  | 0.0175(7)  | 0.0117(5)  | -0.0005(5) | 0.0057(5) | -0.0002(5) |
| C(20) | 0.0156(7)  | 0.0156(7)  | 0.0172(6)  | -0.0027(5) | 0.0056(6) | -0.0010(5) |
| C(21) | 0.0167(7)  | 0.0186(7)  | 0.0185(7)  | 0.0010(6)  | 0.0053(6) | 0.0045(6)  |
| C(22) | 0.0126(6)  | 0.0251(8)  | 0.0134(6)  | -0.0022(6) | 0.0045(5) | -0.0009(6) |
| C(23) | 0.0166(7)  | 0.0192(7)  | 0.0130(6)  | -0.0028(5) | 0.0062(5) | -0.0048(6) |
| C(24) | 0.0169(7)  | 0.0146(6)  | 0.0139(6)  | 0.0004(5)  | 0.0069(5) | -0.0005(5) |
| C(25) | 0.0109(6)  | 0.0183(7)  | 0.0110(5)  | -0.0011(5) | 0.0057(5) | -0.0008(5) |
| C(26) | 0.0154(7)  | 0.0174(8)  | 0.0322(9)  | 0.0003(7)  | 0.0012(7) | -0.0013(6) |
| C(27) | 0.0157(7)  | 0.0165(7)  | 0.0338(9)  | 0.0008(7)  | 0.0043(7) | -0.0029(6) |
| C(28) | 0.0151(6)  | 0.0147(7)  | 0.0148(6)  | -0.0002(5) | 0.0067(5) | -0.0009(5) |
| C(29) | 0.0239(8)  | 0.0163(7)  | 0.0169(6)  | 0.0029(5)  | 0.0074(6) | 0.0048(6)  |
| C(30) | 0.0476(12) | 0.0272(9)  | 0.0393(10) | -0.0068(8) | 0.0263(9) | -0.0134(9) |
| C(31) | 0.0171(8)  | 0.0664(14) | 0.0232(8)  | -0.0053(9) | 0.0107(7) | -0.0149(9) |
| C(32) | 0.0162(7)  | 0.0491(12) | 0.0162(7)  | 0.0027(7)  | 0.0077(6) | -0.0096(7) |
| C(33) | 0.0165(7)  | 0.0251(8)  | 0.0185(7)  | -0.0017(6) | 0.0084(6) | 0.0010(6)  |
| C(34) | 0.0187(7)  | 0.0216(8)  | 0.0248(7)  | 0.0044(6)  | 0.0117(6) | 0.0023(6)  |
| Cl(1) | 0.0430(3)  | 0.0216(2)  | 0.0420(2)  | 0.0003(2)  | 0.0315(2) | 0.0022(2)  |
| Cl(2) | 0.0265(2)  | 0.0350(2)  | 0.0303(2)  | 0.0128(2)  | 0.0130(2) | 0.0106(2)  |
| Cl(3) | 0.0361(2)  | 0.0317(2)  | 0.0248(2)  | -0.0029(2) | 0.0162(2) | 0.0002(2)  |

<sup>a</sup>The estimated standard deviations of the least significant digits are given in parentheses. The anisotropic displacement factor exponent takes the form:  $-2 \pi [h^2 U_{11} + \dots + 2 h k a^* b^* U_{12}]$ .

**Table S13.** Hydrogen Atom Coordinates and Equivalent Isotropic Displacement Parameters ( $\text{\AA}^2$ ) for  $[\text{Fe}(\text{TPP})(\text{CN})(1\text{-MeIm})]\cdot 1\text{-MeIm}\cdot \text{CHCl}_3^a$

| atom   | $x$     | $y$    | $z$     | $U(\text{eq})$ |
|--------|---------|--------|---------|----------------|
| H(36)  | 0.5727  | 0.8174 | 0.1384  | 0.017          |
| H(35)  | 0.5372  | 0.7856 | 0.0342  | 0.018          |
| H(25)  | 0.2856  | 0.6391 | -0.1591 | 0.020          |
| H(24)  | 0.1506  | 0.6358 | -0.1903 | 0.021          |
| H(14)  | -0.0022 | 0.8150 | -0.0926 | 0.017          |
| H(13)  | 0.0327  | 0.8795 | 0.0088  | 0.017          |
| H(3)   | 0.2859  | 0.8354 | 0.2166  | 0.017          |
| H(2)   | 0.4210  | 0.8100 | 0.2491  | 0.017          |
| H(29)  | 0.4432  | 0.5054 | -0.0591 | 0.028          |
| H(30)  | 0.5166  | 0.4754 | -0.1014 | 0.035          |
| H(31)  | 0.5411  | 0.6603 | -0.1448 | 0.028          |
| H(32)  | 0.4930  | 0.8765 | -0.1445 | 0.026          |
| H(33)  | 0.4232  | 0.9085 | -0.0993 | 0.022          |
| H(18)  | 0.0126  | 0.5448 | -0.1350 | 0.022          |
| H(19)  | -0.1011 | 0.5107 | -0.2236 | 0.027          |
| H(20)  | -0.1366 | 0.6580 | -0.3031 | 0.027          |
| H(21)  | -0.0570 | 0.8372 | -0.2946 | 0.024          |
| H(22)  | 0.0574  | 0.8703 | -0.2070 | 0.021          |
| H(11)  | 0.0816  | 0.6967 | 0.0971  | 0.022          |
| H(10)  | 0.0162  | 0.7329 | 0.1456  | 0.024          |
| H(9)   | 0.0386  | 0.9302 | 0.2025  | 0.024          |
| H(8)   | 0.1265  | 1.0906 | 0.2109  | 0.023          |
| H(7)   | 0.1928  | 1.0557 | 0.1625  | 0.019          |
| H(44)  | 0.5424  | 0.6018 | 0.2184  | 0.021          |
| H(43)  | 0.6492  | 0.5958 | 0.3125  | 0.024          |
| H(42)  | 0.6969  | 0.7983 | 0.3666  | 0.022          |
| H(41)  | 0.6402  | 1.0081 | 0.3245  | 0.020          |
| H(40)  | 0.5306  | 1.0133 | 0.2315  | 0.019          |
| H(49)  | 0.3912  | 1.0570 | 0.0603  | 0.032          |
| H(48)  | 0.3465  | 1.2846 | 0.0145  | 0.031          |
| H(46)  | 0.1742  | 1.0234 | -0.0582 | 0.018          |
| H(47A) | 0.1402  | 1.2650 | -0.0947 | 0.031          |
| H(47B) | 0.2069  | 1.3266 | -0.1014 | 0.031          |
| H(47C) | 0.1955  | 1.3782 | -0.0493 | 0.031          |

**Table S13.** Continued

| atom   | $x$    | $y$    | $z$    | $U(\text{eq})$ |
|--------|--------|--------|--------|----------------|
| H(50A) | 0.2209 | 0.5657 | 0.2281 | 0.054          |
| H(50B) | 0.3104 | 0.5712 | 0.2580 | 0.054          |
| H(50C) | 0.2714 | 0.6405 | 0.2902 | 0.054          |
| H(51)  | 0.2895 | 0.4930 | 0.3758 | 0.042          |
| H(52)  | 0.2972 | 0.2523 | 0.4003 | 0.033          |
| H(53)  | 0.2649 | 0.2812 | 0.2366 | 0.024          |
| H(54)  | 0.1939 | 0.3951 | 0.0613 | 0.026          |

<sup>a</sup> $U(\text{eq})$  is defined as one third of the trace of the orthogonalized  $\mathbf{U}_{ij}$  tensor the estimated standard deviations of the least significant digits are given in parentheses.

**Table S14.** Complete Crystallographic Details for [Fe(TMP)(CN)(1-MeIm)]·1.8CHCl<sub>3</sub>

|                                                              |                                                                           |
|--------------------------------------------------------------|---------------------------------------------------------------------------|
| formula                                                      | C <sub>62.80</sub> H <sub>59.80</sub> Cl <sub>5.40</sub> FeN <sub>7</sub> |
| FW, amu                                                      | 1159.86                                                                   |
| <i>a</i> , Å                                                 | 16.4839(2)                                                                |
| <i>b</i> , Å                                                 | 17.6960(3)                                                                |
| <i>c</i> , Å                                                 | 20.0081(3)                                                                |
| $\beta$ , deg                                                | 99.032(1)                                                                 |
| <i>V</i> , Å <sup>3</sup>                                    | 5763.98(15)                                                               |
| space group                                                  | P21/n                                                                     |
| <i>Z</i>                                                     | 4                                                                         |
| D <sub>c</sub> , g/cm <sup>3</sup>                           | 1.337                                                                     |
| F(000)                                                       | 2414                                                                      |
| $\mu$ , mm <sup>-1</sup>                                     | 0.558                                                                     |
| crystal dimensions, mm                                       | 0.31 × 0.24 × 0.17                                                        |
| radiation                                                    | MoK $\alpha$ , $\bar{\lambda}$ = 0.71073 Å                                |
| temperature, K                                               | 100(2)                                                                    |
| diffractometer                                               | Bruker Apex CCD                                                           |
| $\theta$ range for collected data, deg                       | 1.49–26.62                                                                |
| index range                                                  | –20 ≤ <i>h</i> ≤ 19<br>–20 ≤ <i>k</i> ≤ 22<br>–24 ≤ <i>l</i> ≤ 25         |
| total data collected                                         | 51896                                                                     |
| absorption correction                                        | Semi-empirical fromequiv                                                  |
| relative transmission coefficients (I)                       | 0.9110 and 0.8459                                                         |
| unique data                                                  | 12045 ( <i>R</i> <sub>int</sub> = 0.067)                                  |
| unique observed data [ <i>I</i> > 2 $\sigma$ ( <i>I</i> )]   | 6964                                                                      |
| refinement method                                            | Full-matrix least-squares on <i>F</i> <sup>2</sup>                        |
| data/restraints/parameters                                   | 12045/160/728                                                             |
| goodness-of-fit (pased on <i>F</i> <sup>2</sup> )            | 0.923                                                                     |
| final <i>R</i> indices [ <i>I</i> > 2 $\sigma$ ( <i>I</i> )] | <i>R</i> <sub>1</sub> = 0.0513, <i>wR</i> <sub>2</sub> = 0.1221           |
| final <i>R</i> indices (all data)                            | <i>R</i> <sub>1</sub> = 0.0896, <i>wR</i> <sub>2</sub> = 0.1292           |

**Table S15.** Atomic Coordinates and Equivalent Isotropic Displacement Parameters ( $\text{\AA}^2$ ) for  $[\text{Fe}(\text{TMP})(\text{CN})(1\text{-MeIm})]\cdot 1.8\text{CHCl}_3^a$

| atom  | <i>x</i>    | <i>y</i>    | <i>z</i>    | <i>U</i> (eq) |
|-------|-------------|-------------|-------------|---------------|
| Fe(1) | 0.65255(2)  | 0.71570(2)  | 0.64925(2)  | 0.0129(1)     |
| N(1)  | 0.56209(14) | 0.75419(13) | 0.69374(12) | 0.0133(6)     |
| N(2)  | 0.71171(14) | 0.68403(13) | 0.73937(12) | 0.0134(6)     |
| N(3)  | 0.74335(14) | 0.67751(13) | 0.60472(12) | 0.0130(6)     |
| N(4)  | 0.59433(13) | 0.74836(13) | 0.55933(12) | 0.0124(6)     |
| N(5)  | 0.56549(16) | 0.56103(15) | 0.64080(13) | 0.0228(7)     |
| N(6)  | 0.70771(14) | 0.81828(14) | 0.65964(12) | 0.0153(6)     |
| N(7)  | 0.77196(15) | 0.91915(14) | 0.70597(12) | 0.0171(6)     |
| C(a1) | 0.49600(17) | 0.79671(17) | 0.66437(15) | 0.0158(7)     |
| C(a2) | 0.54897(17) | 0.74028(17) | 0.75917(15) | 0.0160(7)     |
| C(a3) | 0.68089(18) | 0.67932(17) | 0.79955(15) | 0.0152(7)     |
| C(a4) | 0.79194(17) | 0.65987(16) | 0.75359(15) | 0.0138(7)     |
| C(a5) | 0.81865(17) | 0.65229(17) | 0.63655(15) | 0.0154(7)     |
| C(a6) | 0.74492(17) | 0.66921(17) | 0.53621(15) | 0.0150(7)     |
| C(a7) | 0.61637(17) | 0.73517(16) | 0.49674(14) | 0.0127(7)     |
| C(a8) | 0.52515(17) | 0.79302(17) | 0.54811(15) | 0.0142(7)     |
| C(b1) | 0.44278(17) | 0.81217(18) | 0.71287(15) | 0.0174(7)     |
| C(b2) | 0.47420(17) | 0.77594(17) | 0.77072(16) | 0.0189(7)     |
| C(b3) | 0.74350(17) | 0.65250(17) | 0.85211(15) | 0.0166(7)     |
| C(b4) | 0.81192(18) | 0.64216(17) | 0.82410(15) | 0.0179(7)     |
| C(b5) | 0.86747(18) | 0.62786(18) | 0.58739(15) | 0.0185(7)     |
| C(b6) | 0.82107(18) | 0.63585(17) | 0.52588(16) | 0.0190(7)     |
| C(b7) | 0.55901(17) | 0.77261(17) | 0.44520(15) | 0.0174(7)     |
| C(b8) | 0.50401(18) | 0.80860(17) | 0.47719(15) | 0.0173(7)     |
| C(m1) | 0.60264(17) | 0.70245(17) | 0.80898(15) | 0.0144(7)     |
| C(m2) | 0.84439(17) | 0.64767(16) | 0.70647(15) | 0.0143(7)     |
| C(m3) | 0.68513(17) | 0.69544(16) | 0.48411(14) | 0.0130(7)     |
| C(m4) | 0.47925(17) | 0.81822(17) | 0.59671(15) | 0.0159(7)     |
| C(1)  | 0.57497(18) | 0.68825(18) | 0.87612(15) | 0.0176(7)     |
| C(2)  | 0.53484(18) | 0.62146(18) | 0.88736(16) | 0.0218(7)     |
| C(3)  | 0.5201(2)   | 0.5604(2)   | 0.83364(18) | 0.0364(9)     |
| C(4)  | 0.50684(19) | 0.61038(19) | 0.94909(16) | 0.0247(8)     |
| C(5)  | 0.51724(19) | 0.6645(2)   | 0.99906(17) | 0.0266(8)     |
| C(6)  | 0.4849(2)   | 0.6525(2)   | 1.06509(18) | 0.0420(10)    |

**Table S15.** Continued

| atom  | <i>x</i>    | <i>y</i>    | <i>z</i>    | <i>U</i> (eq) |
|-------|-------------|-------------|-------------|---------------|
| C(7)  | 0.55648(19) | 0.7311(2)   | 0.98719(16) | 0.0278(9)     |
| C(8)  | 0.58589(18) | 0.74421(19) | 0.92609(16) | 0.0220(8)     |
| C(9)  | 0.6275(2)   | 0.8181(2)   | 0.91557(17) | 0.0339(9)     |
| C(10) | 0.93300(17) | 0.62926(18) | 0.73125(14) | 0.0164(7)     |
| C(11) | 0.96045(18) | 0.55450(18) | 0.73785(15) | 0.0195(7)     |
| C(12) | 0.90172(19) | 0.48915(18) | 0.72335(18) | 0.0292(9)     |
| C(13) | 1.04329(19) | 0.54067(19) | 0.75934(16) | 0.0249(8)     |
| C(14) | 1.09976(19) | 0.5988(2)   | 0.77326(16) | 0.0260(8)     |
| C(15) | 1.19048(19) | 0.5826(2)   | 0.7953(2)   | 0.0394(10)    |
| C(16) | 1.07141(18) | 0.67255(19) | 0.76689(15) | 0.0229(8)     |
| C(17) | 0.98871(18) | 0.68915(18) | 0.74596(15) | 0.0187(7)     |
| C(18) | 0.96018(19) | 0.77007(18) | 0.74075(17) | 0.0252(8)     |
| C(19) | 0.69567(17) | 0.68167(17) | 0.41183(15) | 0.0146(7)     |
| C(20) | 0.64464(18) | 0.62866(17) | 0.37346(15) | 0.0173(7)     |
| C(21) | 0.5804(2)   | 0.58541(19) | 0.40334(16) | 0.0268(8)     |
| C(22) | 0.65258(18) | 0.61746(18) | 0.30549(16) | 0.0217(8)     |
| C(23) | 0.70843(18) | 0.6577(2)   | 0.27453(15) | 0.0229(8)     |
| C(24) | 0.7129(2)   | 0.6458(2)   | 0.20051(16) | 0.0397(10)    |
| C(25) | 0.75867(18) | 0.70911(19) | 0.31379(16) | 0.0225(8)     |
| C(26) | 0.75372(17) | 0.72192(18) | 0.38144(15) | 0.0177(7)     |
| C(27) | 0.81066(19) | 0.77924(19) | 0.42055(16) | 0.0268(8)     |
| C(28) | 0.40671(17) | 0.86840(18) | 0.57489(14) | 0.0148(7)     |
| C(29) | 0.32747(18) | 0.83736(18) | 0.55855(15) | 0.0177(7)     |
| C(30) | 0.31303(19) | 0.75340(18) | 0.56132(17) | 0.0268(8)     |
| C(31) | 0.26120(18) | 0.88585(18) | 0.54088(15) | 0.0189(7)     |
| C(32) | 0.27124(18) | 0.96387(19) | 0.53865(15) | 0.0197(7)     |
| C(33) | 0.19634(19) | 1.01487(19) | 0.52441(17) | 0.0276(8)     |
| C(34) | 0.35052(19) | 0.99317(19) | 0.55369(16) | 0.0224(8)     |
| C(35) | 0.41855(18) | 0.94666(18) | 0.57178(15) | 0.0183(7)     |
| C(36) | 0.50330(18) | 0.97986(18) | 0.58767(17) | 0.0239(8)     |
| C(37) | 0.59850(18) | 0.61868(18) | 0.64166(15) | 0.0157(7)     |
| C(38) | 0.74130(17) | 0.85153(17) | 0.71702(15) | 0.0158(7)     |
| C(39) | 0.7179(2)   | 0.86891(19) | 0.60984(17) | 0.0281(9)     |
| C(40) | 0.7569(2)   | 0.9310(2)   | 0.63763(17) | 0.0309(9)     |

**Table S15.** Continued

| atom   | <i>x</i>    | <i>y</i>    | <i>z</i>    | <i>U</i> (eq) |
|--------|-------------|-------------|-------------|---------------|
| C(41)  | 0.8158(2)   | 0.97084(18) | 0.75680(16) | 0.0246(8)     |
| C(42)  | 0.37385(18) | 0.57772(18) | 0.43698(16) | 0.0222(8)     |
| Cl(1)  | 0.35260(5)  | 0.66591(5)  | 0.39492(4)  | 0.0270(2)     |
| Cl(2)  | 0.28106(5)  | 0.53141(5)  | 0.44616(5)  | 0.0308(2)     |
| Cl(3)  | 0.43556(5)  | 0.59150(5)  | 0.51589(4)  | 0.0245(2)     |
| C(43a) | 0.8965(7)   | 0.4781(5)   | 0.4064(5)   | 0.086(3)      |
| Cl(4a) | 0.9688(3)   | 0.4844(3)   | 0.4781(2)   | 0.0936(12)    |
| Cl(5a) | 0.8891(6)   | 0.5620(4)   | 0.3688(4)   | 0.161(3)      |
| Cl(6a) | 0.8180(5)   | 0.4243(4)   | 0.4017(3)   | 0.168(2)      |
| C(43b) | 0.8097(10)  | 0.4623(8)   | 0.3941(11)  | 0.086(3)      |
| Cl(4b) | 0.8511(4)   | 0.5351(4)   | 0.3680(3)   | 0.0936(12)    |
| Cl(5b) | 0.7107(5)   | 0.4297(4)   | 0.3578(4)   | 0.161(3)      |
| Cl(6b) | 0.8760(6)   | 0.3791(6)   | 0.3904(7)   | 0.168(2)      |
| Cl(4C) | 0.9502(5)   | 0.5455(6)   | 0.4047(4)   | 0.0936(12)    |
| Cl(5C) | 0.7877(7)   | 0.4967(7)   | 0.3863(7)   | 0.161(3)      |
| Cl(6C) | 0.9078(11)  | 0.3857(8)   | 0.3925(13)  | 0.168(2)      |

<sup>a</sup>*U*(eq) is defined as one third of the trace of the orthogonalized  $\mathbf{U}_{ij}$  tensor. The estimated standard deviations of the least significant digits are given in parentheses.



**Table S16.** Bond Lengths for [Fe(TMP)(CN)(1-MeIm)]·1.8CHCl<sub>3</sub><sup>a</sup>

| bond        | length (Å) | bond         | length (Å) |
|-------------|------------|--------------|------------|
| Fe(1)–C(37) | 1.929(3)   | C(12)–H(12C) | 0.9800     |
| Fe(1)–N(1)  | 1.974(2)   | C(13)–C(14)  | 1.386(4)   |
| Fe(1)–N(3)  | 1.977(2)   | C(13)–H(13)  | 0.9500     |
| Fe(1)–N(4)  | 1.987(2)   | C(14)–C(16)  | 1.385(4)   |
| Fe(1)–N(2)  | 1.991(2)   | C(14)–C(15)  | 1.518(4)   |
| Fe(1)–N(6)  | 2.026(2)   | C(15)–H(15a) | 0.9800     |
| N(1)–C(a1)  | 1.377(3)   | C(15)–H(15b) | 0.9800     |
| N(1)–C(a2)  | 1.382(4)   | C(15)–H(15C) | 0.9800     |
| N(2)–C(a4)  | 1.376(3)   | C(16)–C(17)  | 1.393(4)   |
| N(2)–C(a3)  | 1.381(4)   | C(16)–H(16)  | 0.9500     |
| N(3)–C(a5)  | 1.377(3)   | C(17)–C(18)  | 1.506(4)   |
| N(3)–C(a6)  | 1.383(4)   | C(18)–H(18a) | 0.9800     |
| N(4)–C(a8)  | 1.377(3)   | C(18)–H(18b) | 0.9800     |
| N(4)–C(a7)  | 1.378(4)   | C(18)–H(18C) | 0.9800     |
| N(5)–C(37)  | 1.155(4)   | C(19)–C(20)  | 1.405(4)   |
| N(6)–C(38)  | 1.331(4)   | C(19)–C(26)  | 1.406(4)   |
| N(6)–C(39)  | 1.370(4)   | C(20)–C(22)  | 1.401(4)   |
| N(7)–C(38)  | 1.331(4)   | C(20)–C(21)  | 1.504(4)   |
| N(7)–C(40)  | 1.367(4)   | C(21)–H(21a) | 0.9800     |
| N(7)–C(41)  | 1.471(4)   | C(21)–H(21b) | 0.9800     |
| C(a1)–C(m4) | 1.391(4)   | C(21)–H(21C) | 0.9800     |
| C(a1)–C(b1) | 1.433(4)   | C(22)–C(23)  | 1.384(4)   |
| C(a2)–C(m1) | 1.395(4)   | C(22)–H(22)  | 0.9500     |
| C(a2)–C(b2) | 1.435(4)   | C(23)–C(25)  | 1.388(4)   |
| C(a3)–C(m1) | 1.394(4)   | C(23)–C(24)  | 1.509(4)   |
| C(a3)–C(b3) | 1.434(4)   | C(24)–H(24a) | 0.9800     |
| C(a4)–C(m2) | 1.392(4)   | C(24)–H(24b) | 0.9800     |
| C(a4)–C(b4) | 1.432(4)   | C(24)–H(24C) | 0.9800     |
| C(a5)–C(m2) | 1.399(4)   | C(25)–C(26)  | 1.387(4)   |
| C(a5)–C(b5) | 1.432(4)   | C(25)–H(25)  | 0.9500     |
| C(a6)–C(m3) | 1.397(4)   | C(26)–C(27)  | 1.514(4)   |
| C(a6)–C(b6) | 1.431(4)   | C(27)–H(27a) | 0.9800     |
| C(a7)–C(m3) | 1.390(4)   | C(27)–H(27b) | 0.9800     |
| C(a7)–C(b7) | 1.446(4)   | C(27)–H(27C) | 0.9800     |

**Table S16.** Continued

| bond        | length (Å) | bond          | length (Å) |
|-------------|------------|---------------|------------|
| C(a8)–C(m4) | 1.396(4)   | C(28)–C(35)   | 1.401(4)   |
| C(a8)–C(b8) | 1.434(4)   | C(28)–C(29)   | 1.407(4)   |
| C(b1)–C(b2) | 1.353(4)   | C(29)–C(31)   | 1.391(4)   |
| C(b1)–H(b1) | 0.9500     | C(29)–C(30)   | 1.507(4)   |
| C(b2)–H(b2) | 0.9500     | C(30)–H(30a)  | 0.9800     |
| C(b3)–C(b4) | 1.348(4)   | C(30)–H(30b)  | 0.9800     |
| C(b3)–H(b3) | 0.9500     | C(30)–H(30C)  | 0.9800     |
| C(b4)–H(b4) | 0.9500     | C(31)–C(32)   | 1.392(4)   |
| C(b5)–C(b6) | 1.351(4)   | C(31)–H(31)   | 0.9500     |
| C(b5)–H(b5) | 0.9500     | C(32)–C(34)   | 1.394(4)   |
| C(b6)–H(b6) | 0.9500     | C(32)–C(33)   | 1.520(4)   |
| C(b7)–C(b8) | 1.349(4)   | C(33)–H(33a)  | 0.9800     |
| C(b7)–H(b7) | 0.9500     | C(33)–H(33b)  | 0.9800     |
| C(b8)–H(b8) | 0.9500     | C(33)–H(33C)  | 0.9800     |
| C(m1)–C(1)  | 1.506(4)   | C(34)–C(35)   | 1.392(4)   |
| C(m2)–C(10) | 1.503(4)   | C(34)–H(34)   | 0.9500     |
| C(m3)–C(19) | 1.503(4)   | C(35)–C(36)   | 1.503(4)   |
| C(m4)–C(28) | 1.498(4)   | C(36)–H(36a)  | 0.9800     |
| C(1)–C(2)   | 1.390(4)   | C(36)–H(36b)  | 0.9800     |
| C(1)–C(8)   | 1.399(4)   | C(36)–H(36C)  | 0.9800     |
| C(2)–C(4)   | 1.399(4)   | C(38)–H(38)   | 0.9500     |
| C(2)–C(3)   | 1.516(5)   | C(39)–C(40)   | 1.347(4)   |
| C(3)–H(3a)  | 0.9800     | C(39)–H(39)   | 0.9500     |
| C(3)–H(3b)  | 0.9800     | C(40)–H(40)   | 0.9500     |
| C(3)–H(3C)  | 0.9800     | C(41)–H(41a)  | 0.9800     |
| C(4)–C(5)   | 1.375(4)   | C(41)–H(41b)  | 0.9800     |
| C(4)–H(4)   | 0.9500     | C(41)–H(41C)  | 0.9800     |
| C(5)–C(7)   | 1.382(5)   | C(42)–Cl(3)   | 1.756(3)   |
| C(5)–C(6)   | 1.515(5)   | C(42)–Cl(2)   | 1.770(3)   |
| C(6)–H(6a)  | 0.9800     | C(42)–Cl(1)   | 1.782(3)   |
| C(6)–H(6b)  | 0.9800     | C(42)–H(42)   | 1.0000     |
| C(6)–H(6C)  | 0.9800     | C(43a)–Cl(4C) | 1.490(11)  |
| C(7)–C(8)   | 1.403(4)   | C(43a)–Cl(6a) | 1.597(11)  |
| C(7)–H(7)   | 0.9500     | C(43a)–Cl(5a) | 1.661(10)  |

**Table S16.** Continued

| bond         | length (Å) | bond             | length (Å) |
|--------------|------------|------------------|------------|
| C(8)–C(9)    | 1.506(5)   | C(43a)–Cl(6C)    | 1.674(14)  |
| C(9)–H(9a)   | 0.9800     | C(43a)–Cl(4a)    | 1.719(10)  |
| C(9)–H(9b)   | 0.9800     | C(43a)–Cl(5C)    | 1.806(13)  |
| C(9)–H(9C)   | 0.9800     | Cl(4a)–Cl(4a)#1) | 1.360(8)   |
| C(10)–C(11)  | 1.398(4)   | C(43b)–Cl(4b)    | 1.584(15)  |
| C(10)–C(17)  | 1.403(4)   | C(43b)–Cl(5b)    | 1.775(16)  |
| C(11)–C(13)  | 1.388(4)   | C(43b)–Cl(6b)    | 1.842(15)  |
| C(11)–C(12)  | 1.507(4)   | C(43b)–H(43b)    | 1.0000     |
| C(12)–H(12a) | 0.9800     |                  |            |
| C(12)–H(12b) | 0.9800     |                  |            |

<sup>a</sup>The estimated standard deviations of the least significant digits are given in parentheses.

**Table S17.** Bond Angles for [Fe(TMP)(CN)(1-MeIm)]·1.8CHCl<sub>3</sub><sup>a</sup>

| angle            | degree     | angle               | degree   |
|------------------|------------|---------------------|----------|
| C(37)–Fe(1)–N(1) | 88.30(11)  | C(14)–C(13)–C(11)   | 121.9(3) |
| C(37)–Fe(1)–N(3) | 91.90(11)  | C(14)–C(13)–H(13)   | 119.0    |
| N(1)–Fe(1)–N(3)  | 179.80(11) | C(11)–C(13)–H(13)   | 119.0    |
| C(37)–Fe(1)–N(4) | 92.07(11)  | C(16)–C(14)–C(13)   | 118.3(3) |
| N(1)–Fe(1)–N(4)  | 90.93(10)  | C(16)–C(14)–C(15)   | 120.5(3) |
| N(3)–Fe(1)–N(4)  | 89.06(10)  | C(13)–C(14)–C(15)   | 121.2(3) |
| C(37)–Fe(1)–N(2) | 88.58(11)  | C(14)–C(15)–H(15a)  | 109.5    |
| N(1)–Fe(1)–N(2)  | 89.20(10)  | C(14)–C(15)–H(15b)  | 109.5    |
| N(3)–Fe(1)–N(2)  | 90.81(10)  | H(15a)–C(15)–H(15b) | 109.5    |
| N(4)–Fe(1)–N(2)  | 179.34(10) | C(14)–C(15)–H(15C)  | 109.5    |
| C(37)–Fe(1)–N(6) | 178.30(11) | H(15a)–C(15)–H(15C) | 109.5    |
| N(1)–Fe(1)–N(6)  | 90.18(10)  | H(15b)–C(15)–H(15C) | 109.5    |
| N(3)–Fe(1)–N(6)  | 89.62(10)  | C(14)–C(16)–C(17)   | 121.8(3) |
| N(4)–Fe(1)–N(6)  | 88.71(10)  | C(14)–C(16)–H(16)   | 119.1    |
| N(2)–Fe(1)–N(6)  | 90.64(10)  | C(17)–C(16)–H(16)   | 119.1    |
| C(a1)–N(1)–C(a2) | 105.7(2)   | C(16)–C(17)–C(10)   | 118.8(3) |
| C(a1)–N(1)–Fe(1) | 126.8(2)   | C(16)–C(17)–C(18)   | 120.1(3) |
| C(a2)–N(1)–Fe(1) | 127.40(19) | C(10)–C(17)–C(18)   | 121.1(3) |
| C(a4)–N(2)–C(a3) | 105.9(2)   | C(17)–C(18)–H(18a)  | 109.5    |
| C(a4)–N(2)–Fe(1) | 126.35(19) | C(17)–C(18)–H(18b)  | 109.5    |
| C(a3)–N(2)–Fe(1) | 127.72(19) | H(18a)–C(18)–H(18b) | 109.5    |
| C(a5)–N(3)–C(a6) | 105.6(2)   | C(17)–C(18)–H(18C)  | 109.5    |
| C(a5)–N(3)–Fe(1) | 126.4(2)   | H(18a)–C(18)–H(18C) | 109.5    |
| C(a6)–N(3)–Fe(1) | 128.05(19) | H(18b)–C(18)–H(18C) | 109.5    |
| C(a8)–N(4)–C(a7) | 106.2(2)   | C(20)–C(19)–C(26)   | 119.5(3) |
| C(a8)–N(4)–Fe(1) | 125.8(2)   | C(20)–C(19)–C(m3)   | 119.0(3) |
| C(a7)–N(4)–Fe(1) | 127.95(19) | C(26)–C(19)–C(m3)   | 121.6(3) |
| C(38)–N(6)–C(39) | 104.9(3)   | C(22)–C(20)–C(19)   | 119.1(3) |
| C(38)–N(6)–Fe(1) | 127.1(2)   | C(22)–C(20)–C(21)   | 119.5(3) |
| C(39)–N(6)–Fe(1) | 128.0(2)   | C(19)–C(20)–C(21)   | 121.4(3) |
| C(38)–N(7)–C(40) | 106.8(3)   | C(20)–C(21)–H(21a)  | 109.5    |
| C(38)–N(7)–C(41) | 127.1(3)   | C(20)–C(21)–H(21b)  | 109.5    |
| C(40)–N(7)–C(41) | 126.1(3)   | H(21a)–C(21)–H(21b) | 109.5    |
| N(1)–C(a1)–C(m4) | 126.0(3)   | C(20)–C(21)–H(21C)  | 109.5    |

**Table S17.** Continued

| angle             | degree   | angle               | degree   |
|-------------------|----------|---------------------|----------|
| N(1)–C(a1)–C(b1)  | 110.0(3) | H(21a)–C(21)–H(21C) | 109.5    |
| C(m4)–C(a1)–C(b1) | 123.9(3) | H(21b)–C(21)–H(21C) | 109.5    |
| N(1)–C(a2)–C(m1)  | 125.9(3) | C(23)–C(22)–C(20)   | 122.1(3) |
| N(1)–C(a2)–C(b2)  | 109.9(3) | C(23)–C(22)–H(22)   | 118.9    |
| C(m1)–C(a2)–C(b2) | 124.1(3) | C(20)–C(22)–H(22)   | 118.9    |
| N(2)–C(a3)–C(m1)  | 125.1(3) | C(22)–C(23)–C(25)   | 117.6(3) |
| N(2)–C(a3)–C(b3)  | 109.8(2) | C(22)–C(23)–C(24)   | 120.4(3) |
| C(m1)–C(a3)–C(b3) | 124.9(3) | C(25)–C(23)–C(24)   | 122.0(3) |
| N(2)–C(a4)–C(m2)  | 125.9(3) | C(23)–C(24)–H(24a)  | 109.5    |
| N(2)–C(a4)–C(b4)  | 109.7(3) | C(23)–C(24)–H(24b)  | 109.5    |
| C(m2)–C(a4)–C(b4) | 124.2(3) | H(24a)–C(24)–H(24b) | 109.5    |
| N(3)–C(a5)–C(m2)  | 126.2(3) | C(23)–C(24)–H(24C)  | 109.5    |
| N(3)–C(a5)–C(b5)  | 110.1(3) | H(24a)–C(24)–H(24C) | 109.5    |
| C(m2)–C(a5)–C(b5) | 123.7(3) | H(24b)–C(24)–H(24C) | 109.5    |
| N(3)–C(a6)–C(m3)  | 125.7(3) | C(26)–C(25)–C(23)   | 122.5(3) |
| N(3)–C(a6)–C(b6)  | 109.9(3) | C(26)–C(25)–H(25)   | 118.7    |
| C(m3)–C(a6)–C(b6) | 124.1(3) | C(23)–C(25)–H(25)   | 118.7    |
| N(4)–C(a7)–C(m3)  | 126.1(3) | C(25)–C(26)–C(19)   | 119.2(3) |
| N(4)–C(a7)–C(b7)  | 109.5(2) | C(25)–C(26)–C(27)   | 119.2(3) |
| C(m3)–C(a7)–C(b7) | 124.2(3) | C(19)–C(26)–C(27)   | 121.7(3) |
| N(4)–C(a8)–C(m4)  | 126.6(3) | C(26)–C(27)–H(27a)  | 109.5    |
| N(4)–C(a8)–C(b8)  | 109.8(3) | C(26)–C(27)–H(27b)  | 109.5    |
| C(m4)–C(a8)–C(b8) | 123.6(3) | H(27a)–C(27)–H(27b) | 109.5    |
| C(b2)–C(b1)–C(a1) | 107.2(3) | C(26)–C(27)–H(27C)  | 109.5    |
| C(b2)–C(b1)–H(b1) | 126.4    | H(27a)–C(27)–H(27C) | 109.5    |
| C(a1)–C(b1)–H(b1) | 126.4    | H(27b)–C(27)–H(27C) | 109.5    |
| C(b1)–C(b2)–C(a2) | 107.1(3) | C(35)–C(28)–C(29)   | 120.4(3) |
| C(b1)–C(b2)–H(b2) | 126.5    | C(35)–C(28)–C(m4)   | 119.2(3) |
| C(a2)–C(b2)–H(b2) | 126.5    | C(29)–C(28)–C(m4)   | 120.4(3) |
| C(b4)–C(b3)–C(a3) | 107.0(3) | C(31)–C(29)–C(28)   | 118.8(3) |
| C(b4)–C(b3)–H(b3) | 126.5    | C(31)–C(29)–C(30)   | 119.7(3) |
| C(a3)–C(b3)–H(b3) | 126.5    | C(28)–C(29)–C(30)   | 121.5(3) |
| C(b3)–C(b4)–C(a4) | 107.6(3) | C(29)–C(30)–H(30a)  | 109.5    |
| C(b3)–C(b4)–H(b4) | 126.2    | C(29)–C(30)–H(30b)  | 109.5    |

**Table S17.** Continued

| angle             | degree   | angle               | degree   |
|-------------------|----------|---------------------|----------|
| C(a4)–C(b4)–H(b4) | 126.2    | H(30a)–C(30)–H(30b) | 109.5    |
| C(b6)–C(b5)–C(a5) | 107.2(3) | C(29)–C(30)–H(30C)  | 109.5    |
| C(b6)–C(b5)–H(b5) | 126.4    | H(30a)–C(30)–H(30C) | 109.5    |
| C(a5)–C(b5)–H(b5) | 126.4    | H(30b)–C(30)–H(30C) | 109.5    |
| C(b5)–C(b6)–C(a6) | 107.2(3) | C(29)–C(31)–C(32)   | 121.8(3) |
| C(b5)–C(b6)–H(b6) | 126.4    | C(29)–C(31)–H(31)   | 119.1    |
| C(a6)–C(b6)–H(b6) | 126.4    | C(32)–C(31)–H(31)   | 119.1    |
| C(b8)–C(b7)–C(a7) | 106.9(3) | C(31)–C(32)–C(34)   | 118.3(3) |
| C(b8)–C(b7)–H(b7) | 126.5    | C(31)–C(32)–C(33)   | 119.9(3) |
| C(a7)–C(b7)–H(b7) | 126.5    | C(34)–C(32)–C(33)   | 121.7(3) |
| C(b7)–C(b8)–C(a8) | 107.6(3) | C(32)–C(33)–H(33a)  | 109.5    |
| C(b7)–C(b8)–H(b8) | 126.2    | C(32)–C(33)–H(33b)  | 109.5    |
| C(a8)–C(b8)–H(b8) | 126.2    | H(33a)–C(33)–H(33b) | 109.5    |
| C(a3)–C(m1)–C(a2) | 122.7(3) | C(32)–C(33)–H(33C)  | 109.5    |
| C(a3)–C(m1)–C(1)  | 119.2(3) | H(33a)–C(33)–H(33C) | 109.5    |
| C(a2)–C(m1)–C(1)  | 118.1(3) | H(33b)–C(33)–H(33C) | 109.5    |
| C(a4)–C(m2)–C(a5) | 123.0(3) | C(35)–C(34)–C(32)   | 121.7(3) |
| C(a4)–C(m2)–C(10) | 119.0(3) | C(35)–C(34)–H(34)   | 119.1    |
| C(a5)–C(m2)–C(10) | 118.0(3) | C(32)–C(34)–H(34)   | 119.1    |
| C(a7)–C(m3)–C(a6) | 122.2(3) | C(34)–C(35)–C(28)   | 118.9(3) |
| C(a7)–C(m3)–C(19) | 118.5(3) | C(34)–C(35)–C(36)   | 120.5(3) |
| C(a6)–C(m3)–C(19) | 119.3(3) | C(28)–C(35)–C(36)   | 120.5(3) |
| C(a1)–C(m4)–C(a8) | 123.0(3) | C(35)–C(36)–H(36a)  | 109.5    |
| C(a1)–C(m4)–C(28) | 118.2(3) | C(35)–C(36)–H(36b)  | 109.5    |
| C(a8)–C(m4)–C(28) | 118.8(3) | H(36a)–C(36)–H(36b) | 109.5    |
| C(2)–C(1)–C(8)    | 119.8(3) | C(35)–C(36)–H(36C)  | 109.5    |
| C(2)–C(1)–C(m1)   | 120.3(3) | H(36a)–C(36)–H(36C) | 109.5    |
| C(8)–C(1)–C(m1)   | 119.8(3) | H(36b)–C(36)–H(36C) | 109.5    |
| C(1)–C(2)–C(4)    | 119.6(3) | N(5)–C(37)–Fe(1)    | 176.2(3) |
| C(1)–C(2)–C(3)    | 121.2(3) | N(6)–C(38)–N(7)     | 111.8(3) |
| C(4)–C(2)–C(3)    | 119.2(3) | N(6)–C(38)–H(38)    | 124.1    |
| C(2)–C(3)–H(3a)   | 109.5    | N(7)–C(38)–H(38)    | 124.1    |
| C(2)–C(3)–H(3b)   | 109.5    | C(40)–C(39)–N(6)    | 109.7(3) |
| H(3a)–C(3)–H(3b)  | 109.5    | C(40)–C(39)–H(39)   | 125.1    |

**Table S17.** Continued

| angle              | degree   | angle                  | degree     |
|--------------------|----------|------------------------|------------|
| C(2)–C(3)–H(3C)    | 109.5    | N(6)–C(39)–H(39)       | 125.1      |
| H(3a)–C(3)–H(3C)   | 109.5    | C(39)–C(40)–N(7)       | 106.8(3)   |
| H(3b)–C(3)–H(3C)   | 109.5    | C(39)–C(40)–H(40)      | 126.6      |
| C(5)–C(4)–C(2)     | 121.6(3) | N(7)–C(40)–H(40)       | 126.6      |
| C(5)–C(4)–H(4)     | 119.2    | N(7)–C(41)–H(41a)      | 109.5      |
| C(2)–C(4)–H(4)     | 119.2    | N(7)–C(41)–H(41b)      | 109.5      |
| C(4)–C(5)–C(7)     | 118.5(3) | H(41a)–C(41)–H(41b)    | 109.5      |
| C(4)–C(5)–C(6)     | 121.1(3) | N(7)–C(41)–H(41C)      | 109.5      |
| C(7)–C(5)–C(6)     | 120.5(3) | H(41a)–C(41)–H(41C)    | 109.5      |
| C(5)–C(6)–H(6a)    | 109.5    | H(41b)–C(41)–H(41C)    | 109.5      |
| C(5)–C(6)–H(6b)    | 109.5    | Cl(3)–C(42)–Cl(2)      | 111.04(17) |
| H(6a)–C(6)–H(6b)   | 109.5    | Cl(3)–C(42)–Cl(1)      | 110.26(17) |
| C(5)–C(6)–H(6C)    | 109.5    | Cl(2)–C(42)–Cl(1)      | 110.21(17) |
| H(6a)–C(6)–H(6C)   | 109.5    | Cl(3)–C(42)–H(42)      | 108.4      |
| H(6b)–C(6)–H(6C)   | 109.5    | Cl(2)–C(42)–H(42)      | 108.4      |
| C(5)–C(7)–C(8)     | 121.7(3) | Cl(1)–C(42)–H(42)      | 108.4      |
| C(5)–C(7)–H(7)     | 119.1    | Cl(4C)–C(43a)–Cl(6a)   | 162.8(8)   |
| C(8)–C(7)–H(7)     | 119.1    | Cl(6a)–C(43a)–Cl(5a)   | 120.4(8)   |
| C(1)–C(8)–C(7)     | 118.8(3) | Cl(4C)–C(43a)–Cl(6C)   | 134.1(10)  |
| C(1)–C(8)–C(9)     | 121.6(3) | Cl(6a)–C(43a)–Cl(6C)   | 61.2(7)    |
| C(7)–C(8)–C(9)     | 119.5(3) | Cl(5a)–C(43a)–Cl(6C)   | 143.1(11)  |
| C(8)–C(9)–H(9a)    | 109.5    | Cl(4C)–C(43a)–Cl(4a)   | 68.3(6)    |
| C(8)–C(9)–H(9b)    | 109.5    | Cl(6a)–C(43a)–Cl(4a)   | 122.5(7)   |
| H(9a)–C(9)–H(9b)   | 109.5    | Cl(5a)–C(43a)–Cl(4a)   | 108.2(7)   |
| C(8)–C(9)–H(9C)    | 109.5    | Cl(6C)–C(43a)–Cl(4a)   | 97.0(9)    |
| H(9a)–C(9)–H(9C)   | 109.5    | Cl(4C)–C(43a)–Cl(5C)   | 114.9(7)   |
| H(9b)–C(9)–H(9C)   | 109.5    | Cl(6a)–C(43a)–Cl(5C)   | 47.8(5)    |
| C(11)–C(10)–C(17)  | 120.2(3) | Cl(5a)–C(43a)–Cl(5C)   | 74.8(6)    |
| C(11)–C(10)–C(m2)  | 121.3(3) | Cl(6C)–C(43a)–Cl(5C)   | 105.9(9)   |
| C(17)–C(10)–C(m2)  | 118.4(3) | Cl(4a)–C(43a)–Cl(5C)   | 135.1(8)   |
| C(13)–C(11)–C(10)  | 119.0(3) | Cl(4a)#1–Cl(4a)–C(43a) | 156.8(7)   |
| C(13)–C(11)–C(12)  | 119.7(3) | Cl(4b)–C(43b)–Cl(5b)   | 123.1(12)  |
| C(10)–C(11)–C(12)  | 121.3(3) | Cl(4b)–C(43b)–Cl(6b)   | 110.3(11)  |
| C(11)–C(12)–H(12a) | 109.5    | Cl(5b)–C(43b)–Cl(6b)   | 103.7(9)   |

**Table S17.** Continued

| angle               | degree | angle                | degree |
|---------------------|--------|----------------------|--------|
| C(11)–C(12)–H(12b)  | 109.5  | Cl(4b)–C(43b)–H(43b) | 106.2  |
| H(12a)–C(12)–H(12b) | 109.5  | Cl(5b)–C(43b)–H(43b) | 106.2  |
| C(11)–C(12)–H(12C)  | 109.5  | Cl(6b)–C(43b)–H(43b) | 106.2  |
| H(12a)–C(12)–H(12C) | 109.5  |                      |        |
| H(12b)–C(12)–H(12C) | 109.5  |                      |        |

<sup>a</sup>The estimated standard deviations of the least significant digits are given in parentheses.



**Table S18.** Anisotropic Displacement Parameters ( $\text{\AA}^2$ ) for  $[\text{Fe}(\text{TMP})(\text{CN})(1\text{-MeIm})]\cdot 1.8\text{CHCl}_3^a$ 

| atom  | $U_{11}$   | $U_{22}$   | $U_{33}$   | $U_{23}$    | $U_{13}$    | $U_{12}$    |
|-------|------------|------------|------------|-------------|-------------|-------------|
| Fe(1) | 0.0113(2)  | 0.0153(3)  | 0.0121(2)  | -0.0005(2)  | 0.0014(2)   | 0.0001(2)   |
| N(1)  | 0.0134(13) | 0.0130(14) | 0.0137(14) | 0.0011(11)  | 0.0026(11)  | -0.0007(11) |
| N(2)  | 0.0118(12) | 0.0166(15) | 0.0118(14) | -0.0013(11) | 0.0019(10)  | -0.0009(11) |
| N(3)  | 0.0126(12) | 0.0150(15) | 0.0113(14) | -0.0006(11) | 0.0016(10)  | 0.0007(11)  |
| N(4)  | 0.0110(12) | 0.0148(15) | 0.0111(14) | -0.0008(11) | 0.0006(10)  | -0.0015(11) |
| N(5)  | 0.0220(15) | 0.0186(17) | 0.0266(17) | 0.0013(13)  | -0.0006(12) | -0.0017(13) |
| N(6)  | 0.0151(13) | 0.0163(15) | 0.0149(15) | -0.0007(12) | 0.0037(11)  | -0.0010(11) |
| N(7)  | 0.0189(14) | 0.0154(15) | 0.0160(15) | 0.0016(12)  | 0.0000(11)  | -0.0025(11) |
| C(A1) | 0.0149(15) | 0.0181(18) | 0.0145(17) | -0.0020(14) | 0.0026(13)  | -0.0005(13) |
| C(A2) | 0.0164(15) | 0.0175(18) | 0.0145(18) | 0.0011(14)  | 0.0037(13)  | -0.0020(13) |
| C(A3) | 0.0182(16) | 0.0142(18) | 0.0139(17) | 0.0003(14)  | 0.0045(13)  | -0.0022(13) |
| C(A4) | 0.0139(15) | 0.0133(17) | 0.0135(17) | 0.0023(14)  | 0.0000(13)  | -0.0026(13) |
| C(A5) | 0.0127(15) | 0.0176(18) | 0.0159(17) | 0.0014(14)  | 0.0023(13)  | 0.0004(13)  |
| C(A6) | 0.0163(15) | 0.0144(18) | 0.0149(18) | -0.0020(14) | 0.0044(13)  | -0.0025(13) |
| C(A7) | 0.0131(15) | 0.0143(18) | 0.0107(17) | -0.0010(13) | 0.0020(12)  | -0.0024(13) |
| C(A8) | 0.0131(15) | 0.0153(18) | 0.0140(17) | -0.0004(14) | 0.0018(13)  | -0.0025(13) |
| C(B1) | 0.0130(15) | 0.0228(19) | 0.0166(18) | -0.0015(15) | 0.0034(13)  | 0.0026(13)  |
| C(B2) | 0.0156(15) | 0.026(2)   | 0.0163(18) | -0.0005(15) | 0.0066(13)  | 0.0003(14)  |
| C(B3) | 0.0189(16) | 0.0187(18) | 0.0121(17) | 0.0021(14)  | 0.0026(13)  | 0.0016(14)  |
| C(B4) | 0.0150(15) | 0.0220(19) | 0.0149(18) | -0.0013(15) | -0.0031(13) | -0.0004(14) |
| C(B5) | 0.0135(15) | 0.025(2)   | 0.0176(18) | -0.0003(15) | 0.0042(13)  | 0.0037(14)  |
| C(B6) | 0.0180(16) | 0.024(2)   | 0.0158(18) | -0.0037(15) | 0.0044(14)  | 0.0023(14)  |
| C(B7) | 0.0190(16) | 0.023(2)   | 0.0094(17) | 0.0014(14)  | 0.0015(13)  | 0.0003(14)  |
| C(B8) | 0.0167(16) | 0.0193(18) | 0.0150(17) | 0.0015(14)  | -0.0009(13) | 0.0033(14)  |
| C(M1) | 0.0150(15) | 0.0188(19) | 0.0105(16) | 0.0001(14)  | 0.0046(12)  | -0.0026(13) |
| C(M2) | 0.0131(15) | 0.0144(17) | 0.0146(17) | -0.0039(14) | -0.0005(13) | 0.0002(13)  |
| C(M3) | 0.0128(15) | 0.0142(17) | 0.0121(17) | -0.0022(13) | 0.0027(12)  | -0.0031(12) |
| C(M4) | 0.0147(15) | 0.0151(18) | 0.0176(18) | -0.0004(14) | 0.0019(13)  | 0.0001(13)  |
| C(1)  | 0.0159(10) | 0.0197(11) | 0.0173(11) | 0.0022(9)   | 0.0028(8)   | 0.0016(8)   |
| C(2)  | 0.0207(10) | 0.0232(11) | 0.0217(11) | 0.0032(9)   | 0.0039(8)   | 0.0017(9)   |
| C(3)  | 0.0389(16) | 0.0331(17) | 0.0391(17) | 0.0016(14)  | 0.0122(14)  | -0.0048(14) |
| C(4)  | 0.0225(11) | 0.0259(11) | 0.0261(11) | 0.0058(9)   | 0.0050(9)   | 0.0007(9)   |
| C(5)  | 0.0241(11) | 0.0311(12) | 0.0252(11) | 0.0047(9)   | 0.0054(9)   | 0.0015(9)   |
| C(6)  | 0.0408(17) | 0.0522(18) | 0.0349(17) | 0.0087(15)  | 0.0115(14)  | -0.0004(15) |

**Table S18.** Continued

| atom  | $U_{11}$   | $U_{22}$   | $U_{33}$   | $U_{23}$    | $U_{13}$    | $U_{12}$    |
|-------|------------|------------|------------|-------------|-------------|-------------|
| C(7)  | 0.0218(17) | 0.046(3)   | 0.0158(19) | -0.0037(17) | 0.0036(14)  | 0.0034(17)  |
| C(8)  | 0.0157(16) | 0.033(2)   | 0.0176(19) | 0.0079(16)  | 0.0032(14)  | 0.0009(15)  |
| C(9)  | 0.040(2)   | 0.044(3)   | 0.020(2)   | -0.0114(18) | 0.0107(17)  | -0.0121(19) |
| C(10) | 0.0138(15) | 0.027(2)   | 0.0090(16) | -0.0008(14) | 0.0029(13)  | 0.0020(14)  |
| C(11) | 0.0181(16) | 0.024(2)   | 0.0158(18) | -0.0023(15) | 0.0005(14)  | 0.0012(14)  |
| C(12) | 0.0239(18) | 0.025(2)   | 0.037(2)   | -0.0024(17) | -0.0006(16) | 0.0040(16)  |
| C(13) | 0.0221(17) | 0.028(2)   | 0.025(2)   | 0.0010(17)  | 0.0043(15)  | 0.0058(16)  |
| C(14) | 0.0175(17) | 0.038(2)   | 0.022(2)   | 0.0012(17)  | 0.0010(15)  | 0.0038(16)  |
| C(15) | 0.0153(18) | 0.050(3)   | 0.050(3)   | 0.002(2)    | -0.0029(17) | 0.0045(17)  |
| C(16) | 0.0164(16) | 0.032(2)   | 0.0197(19) | -0.0004(16) | 0.0018(14)  | -0.0051(15) |
| C(17) | 0.0177(16) | 0.027(2)   | 0.0115(17) | 0.0007(15)  | 0.0032(13)  | 0.0000(14)  |
| C(18) | 0.0214(17) | 0.029(2)   | 0.026(2)   | -0.0013(16) | 0.0057(15)  | -0.0034(15) |
| C(19) | 0.0129(15) | 0.0181(18) | 0.0129(17) | 0.0014(14)  | 0.0017(13)  | 0.0054(13)  |
| C(20) | 0.0167(16) | 0.0212(19) | 0.0142(18) | 0.0004(14)  | 0.0027(13)  | 0.0018(14)  |
| C(21) | 0.0305(19) | 0.030(2)   | 0.0197(19) | -0.0002(16) | 0.0028(15)  | -0.0113(16) |
| C(22) | 0.0190(17) | 0.026(2)   | 0.0189(19) | -0.0062(15) | -0.0011(14) | 0.0031(15)  |
| C(23) | 0.0169(16) | 0.039(2)   | 0.0134(18) | -0.0007(16) | 0.0041(14)  | 0.0078(15)  |
| C(24) | 0.029(2)   | 0.072(3)   | 0.019(2)   | -0.002(2)   | 0.0077(16)  | 0.001(2)    |
| C(25) | 0.0120(15) | 0.034(2)   | 0.023(2)   | 0.0055(16)  | 0.0062(14)  | 0.0029(15)  |
| C(26) | 0.0132(15) | 0.0218(19) | 0.0175(18) | 0.0016(15)  | 0.0009(13)  | 0.0018(14)  |
| C(27) | 0.0253(18) | 0.029(2)   | 0.025(2)   | 0.0014(17)  | 0.0018(15)  | -0.0109(16) |
| C(28) | 0.0165(16) | 0.022(2)   | 0.0062(16) | 0.0003(14)  | 0.0040(12)  | 0.0056(14)  |
| C(29) | 0.0193(16) | 0.024(2)   | 0.0101(17) | -0.0028(14) | 0.0038(13)  | 0.0040(14)  |
| C(30) | 0.0193(17) | 0.027(2)   | 0.032(2)   | -0.0064(17) | -0.0012(15) | 0.0022(15)  |
| C(31) | 0.0147(16) | 0.028(2)   | 0.0138(17) | -0.0013(15) | 0.0019(13)  | -0.0007(14) |
| C(32) | 0.0197(17) | 0.026(2)   | 0.0137(17) | 0.0015(15)  | 0.0046(13)  | 0.0055(15)  |
| C(33) | 0.0198(17) | 0.032(2)   | 0.030(2)   | 0.0026(17)  | 0.0018(15)  | 0.0080(15)  |
| C(34) | 0.0231(18) | 0.022(2)   | 0.0226(19) | 0.0033(15)  | 0.0050(15)  | 0.0050(15)  |
| C(35) | 0.0198(16) | 0.022(2)   | 0.0136(17) | 0.0026(15)  | 0.0042(13)  | 0.0033(14)  |
| C(36) | 0.0195(17) | 0.023(2)   | 0.029(2)   | 0.0037(16)  | 0.0024(15)  | 0.0027(14)  |
| C(37) | 0.0154(15) | 0.021(2)   | 0.0106(17) | 0.0006(14)  | 0.0013(13)  | 0.0072(14)  |
| C(38) | 0.0164(16) | 0.0179(19) | 0.0130(17) | 0.0046(14)  | 0.0018(13)  | -0.0014(14) |
| C(39) | 0.044(2)   | 0.027(2)   | 0.0138(19) | -0.0014(16) | 0.0069(16)  | -0.0148(17) |
| C(40) | 0.047(2)   | 0.026(2)   | 0.020(2)   | 0.0050(16)  | 0.0060(17)  | -0.0136(18) |

**Table S18.** Continued

| atom   | $U_{11}$   | $U_{22}$  | $U_{33}$   | $U_{23}$    | $U_{13}$    | $U_{12}$    |
|--------|------------|-----------|------------|-------------|-------------|-------------|
| C(41)  | 0.0291(19) | 0.022(2)  | 0.0216(19) | -0.0058(15) | -0.0001(15) | -0.0057(15) |
| C(42)  | 0.0193(17) | 0.025(2)  | 0.0229(19) | 0.0008(16)  | 0.0044(14)  | -0.0017(14) |
| Cl(1)  | 0.0296(4)  | 0.0248(5) | 0.0248(5)  | 0.0041(4)   | -0.0010(4)  | -0.0010(4)  |
| Cl(2)  | 0.0216(4)  | 0.0309(5) | 0.0399(6)  | 0.0042(4)   | 0.0043(4)   | -0.0040(4)  |
| Cl(3)  | 0.0255(4)  | 0.0275(5) | 0.0195(5)  | 0.0001(4)   | 0.0004(3)   | 0.0021(4)   |
| C(43A) | 0.127(6)   | 0.048(5)  | 0.083(6)   | 0.002(5)    | 0.016(5)    | 0.017(5)    |
| Cl(4A) | 0.096(2)   | 0.126(3)  | 0.062(2)   | -0.023(2)   | 0.0244(17)  | 0.052(2)    |
| Cl(5A) | 0.258(6)   | 0.107(3)  | 0.155(4)   | 0.067(3)    | 0.144(4)    | 0.093(3)    |
| Cl(6A) | 0.230(6)   | 0.182(4)  | 0.114(3)   | 0.075(3)    | 0.091(4)    | 0.109(4)    |
| C(43B) | 0.127(6)   | 0.048(5)  | 0.083(6)   | 0.002(5)    | 0.016(5)    | 0.017(5)    |
| Cl(4B) | 0.096(2)   | 0.126(3)  | 0.062(2)   | -0.023(2)   | 0.0244(17)  | 0.052(2)    |
| Cl(5B) | 0.258(6)   | 0.107(3)  | 0.155(4)   | 0.067(3)    | 0.144(4)    | 0.093(3)    |
| Cl(6B) | 0.230(6)   | 0.182(4)  | 0.114(3)   | 0.075(3)    | 0.091(4)    | 0.109(4)    |
| Cl(4C) | 0.096(2)   | 0.126(3)  | 0.062(2)   | -0.023(2)   | 0.0244(17)  | 0.052(2)    |
| Cl(5C) | 0.258(6)   | 0.107(3)  | 0.155(4)   | 0.067(3)    | 0.144(4)    | 0.093(3)    |
| Cl(6C) | 0.230(6)   | 0.182(4)  | 0.114(3)   | 0.075(3)    | 0.091(4)    | 0.109(4)    |

<sup>a</sup>The estimated standard deviations of the least significant digits are given in parentheses. The anisotropic displacement factor exponent takes the form:  $-2 \pi [h^2 U_{11} + \dots + 2 h k a^* b^* U_{12}]$ .

**Table S19.** Hydrogen Atom Coordinates and Equivalent Isotropic Displacement Parameters ( $\text{\AA}^2$ ) for  $[\text{Fe}(\text{TMP})(\text{CN})(1\text{-MeIm})]\cdot 1.8\text{CHCl}_3^a$

| atom   | $x$    | $y$    | $z$    | $U(\text{eq})$ |
|--------|--------|--------|--------|----------------|
| H(B1)  | 0.3944 | 0.8422 | 0.7057 | 0.021          |
| H(B2)  | 0.4511 | 0.7744 | 0.8113 | 0.023          |
| H(B3)  | 0.7378 | 0.6437 | 0.8980 | 0.020          |
| H(B4)  | 0.8639 | 0.6261 | 0.8470 | 0.021          |
| H(B5)  | 0.9223 | 0.6095 | 0.5964 | 0.022          |
| H(B6)  | 0.8362 | 0.6219 | 0.4836 | 0.023          |
| H(B7)  | 0.5599 | 0.7720 | 0.3978 | 0.021          |
| H(B8)  | 0.4594 | 0.8388 | 0.4565 | 0.021          |
| H(3A)  | 0.5692 | 0.5287 | 0.8361 | 0.055          |
| H(3B)  | 0.5083 | 0.5839 | 0.7888 | 0.055          |
| H(3C)  | 0.4733 | 0.5292 | 0.8413 | 0.055          |
| H(4)   | 0.4800 | 0.5644 | 0.9567 | 0.030          |
| H(6A)  | 0.5261 | 0.6695 | 1.1028 | 0.063          |
| H(6B)  | 0.4734 | 0.5987 | 1.0705 | 0.063          |
| H(6C)  | 0.4343 | 0.6817 | 1.0646 | 0.063          |
| H(7)   | 0.5637 | 0.7689 | 1.0213 | 0.033          |
| H(9A)  | 0.6339 | 0.8476 | 0.9575 | 0.051          |
| H(9B)  | 0.5940 | 0.8465 | 0.8792 | 0.051          |
| H(9C)  | 0.6817 | 0.8081 | 0.9031 | 0.051          |
| H(12A) | 0.9324 | 0.4415 | 0.7293 | 0.044          |
| H(12B) | 0.8730 | 0.4927 | 0.6767 | 0.044          |
| H(12C) | 0.8616 | 0.4907 | 0.7546 | 0.044          |
| H(13)  | 1.0618 | 0.4899 | 0.7647 | 0.030          |
| H(15A) | 1.2229 | 0.6130 | 0.7682 | 0.059          |
| H(15B) | 1.2011 | 0.5288 | 0.7887 | 0.059          |
| H(15C) | 1.2060 | 0.5955 | 0.8432 | 0.059          |
| H(16)  | 1.1094 | 0.7129 | 0.7771 | 0.027          |
| H(18A) | 0.9312 | 0.7818 | 0.7786 | 0.038          |
| H(18B) | 0.9230 | 0.7775 | 0.6980 | 0.038          |
| H(18C) | 1.0078 | 0.8036 | 0.7422 | 0.038          |
| H(21A) | 0.5331 | 0.6182 | 0.4057 | 0.040          |
| H(21B) | 0.6035 | 0.5684 | 0.4490 | 0.040          |
| H(21C) | 0.5630 | 0.5415 | 0.3749 | 0.040          |
| H(22)  | 0.6185 | 0.5811 | 0.2798 | 0.026          |

**Table S19.** Continued

| atom   | <i>x</i> | <i>y</i> | <i>z</i> | <i>U</i> (eq) |
|--------|----------|----------|----------|---------------|
| H(24A) | 0.7535   | 0.6065   | 0.1957   | 0.059         |
| H(24B) | 0.7292   | 0.6931   | 0.1809   | 0.059         |
| H(24C) | 0.6590   | 0.6302   | 0.1768   | 0.059         |
| H(25)  | 0.7980   | 0.7366   | 0.2935   | 0.027         |
| H(27A) | 0.8594   | 0.7534   | 0.4443   | 0.040         |
| H(27B) | 0.7821   | 0.8049   | 0.4535   | 0.040         |
| H(27C) | 0.8274   | 0.8165   | 0.3891   | 0.040         |
| H(30A) | 0.2546   | 0.7427   | 0.5469   | 0.040         |
| H(30B) | 0.3297   | 0.7354   | 0.6078   | 0.040         |
| H(30C) | 0.3454   | 0.7275   | 0.5312   | 0.040         |
| H(31)  | 0.2076   | 0.8652   | 0.5300   | 0.023         |
| H(33A) | 0.1530   | 0.9892   | 0.4935   | 0.041         |
| H(33B) | 0.2113   | 1.0619   | 0.5036   | 0.041         |
| H(33C) | 0.1765   | 1.0264   | 0.5669   | 0.041         |
| H(34)  | 0.3583   | 1.0463   | 0.5515   | 0.027         |
| H(36A) | 0.5348   | 0.9666   | 0.5517   | 0.036         |
| H(36B) | 0.5310   | 0.9597   | 0.6309   | 0.036         |
| H(36C) | 0.4993   | 1.0350   | 0.5908   | 0.036         |
| H(38)  | 0.7432   | 0.8296   | 0.7606   | 0.019         |
| H(39)  | 0.7001   | 0.8614   | 0.5628   | 0.034         |
| H(40)  | 0.7711   | 0.9745   | 0.6142   | 0.037         |
| H(41A) | 0.7939   | 0.9656   | 0.7993   | 0.037         |
| H(41B) | 0.8084   | 1.0230   | 0.7405   | 0.037         |
| H(41C) | 0.8745   | 0.9583   | 0.7644   | 0.037         |
| H(42)  | 0.4046   | 0.5452   | 0.4086   | 0.027         |
| H(43B) | 0.8075   | 0.4712   | 0.4431   | 0.103         |

<sup>a</sup>*U*(eq) is defined as one third of the trace of the orthogonalized  $\mathbf{U}_{ij}$  tensor the estimated standard deviations of the least significant digits are given in parentheses.

**Table S20.** Complete Crystallographic Details for 3[K(18-crown-6)][Fe(TMP)(CN)<sub>2</sub>] $\cdot$ 5.1(THF) $\cdot$ 0.9H<sub>2</sub>O

|                                           |                                                                                                        |
|-------------------------------------------|--------------------------------------------------------------------------------------------------------|
| formula                                   | C <sub>230.40</sub> H <sub>270.60</sub> Fe <sub>3</sub> K <sub>3</sub> N <sub>18</sub> O <sub>24</sub> |
| FW, amu                                   | 3960.90                                                                                                |
| <i>a</i> , Å                              | 23.0103(9)                                                                                             |
| <i>b</i> , Å                              | 20.1843(8)                                                                                             |
| <i>c</i> , Å                              | 46.1854(18)                                                                                            |
| $\beta$ , deg                             | 98.535(2)                                                                                              |
| <i>V</i> , Å <sup>3</sup>                 | 21213.1(14)                                                                                            |
| space group                               | P21/c                                                                                                  |
| <i>Z</i>                                  | 4                                                                                                      |
| D <sub>c</sub> , g/cm <sup>3</sup>        | 1.240                                                                                                  |
| F(000)                                    | 8424                                                                                                   |
| $\mu$ , mm <sup>-1</sup>                  | 0.331                                                                                                  |
| crystal dimensions, mm                    | 0.49 $\times$ 0.43 $\times$ 0.22                                                                       |
| radiation                                 | MoK $\alpha$ , $\bar{\lambda}$ = 0.71073 Å                                                             |
| temperature, K                            | 100(2)                                                                                                 |
| diffractometer                            | Bruker Apex CCD                                                                                        |
| $\theta$ range for collected data, deg    | 1.10–27.50                                                                                             |
| index range                               | –29 $\leq$ h $\leq$ 29<br>–24 $\leq$ k $\leq$ 22<br>–60 $\leq$ l $\leq$ 50                             |
| total data collected                      | 202746                                                                                                 |
| absorption correction                     | Semi-empirical fromequiv                                                                               |
| relative transmission coefficients (I)    | 0.9307 and 0.8545                                                                                      |
| unique data                               | 46934 ( $R_{\text{int}}$ = 0.051)                                                                      |
| unique observed data [ $I > 2\sigma(I)$ ] | 36729                                                                                                  |
| refinement method                         | Full-matrix least-squares on F <sup>2</sup>                                                            |
| data/restraints/parameters                | 46934/654/2758                                                                                         |
| goodness-of-fit (pased on $F^2$ )         | 1.100                                                                                                  |
| final $R$ indices [ $I > 2\sigma(I)$ ]    | $R_1$ = 0.0789, $wR_2$ = 0.1979                                                                        |
| final $R$ indices (all data)              | $R_1$ = 0.0992, $wR_2$ = 0.2100                                                                        |

**Table S21.** Atomic Coordinates and Equivalent Isotropic Displacement Parameters ( $\text{\AA}^2$ ) for  $3[\text{K}(\text{18-crown-6})][\text{Fe}(\text{TMP})(\text{CN})_2]\cdot 5.1(\text{THF})\cdot 0.9\text{H}_2\text{O}^a$

| atom   | <i>x</i>    | <i>y</i>    | <i>z</i>    | <i>U</i> (eq) |
|--------|-------------|-------------|-------------|---------------|
| Fe(1)  | 0.52721(2)  | 0.67297(2)  | 0.29907(1)  | 0.0154(1)     |
| K(1)   | 0.46893(3)  | 0.41264(4)  | 0.34868(2)  | 0.0251(2)     |
| N(11)  | 0.59851(11) | 0.65458(14) | 0.32766(6)  | 0.0171(5)     |
| N(12)  | 0.56611(12) | 0.63595(15) | 0.26696(6)  | 0.0184(6)     |
| N(13)  | 0.45584(12) | 0.68960(15) | 0.27091(6)  | 0.0188(6)     |
| N(14)  | 0.48845(11) | 0.71295(14) | 0.33033(6)  | 0.0169(5)     |
| N(15)  | 0.57872(14) | 0.81318(17) | 0.28973(7)  | 0.0302(7)     |
| N(16)  | 0.49420(13) | 0.53050(17) | 0.31902(7)  | 0.0278(7)     |
| C(1a1) | 0.60195(13) | 0.65382(18) | 0.35749(7)  | 0.0179(6)     |
| C(1a2) | 0.65157(14) | 0.63223(17) | 0.32145(7)  | 0.0186(7)     |
| C(1a3) | 0.62508(14) | 0.62362(18) | 0.26813(7)  | 0.0193(7)     |
| C(1a4) | 0.54089(14) | 0.62191(18) | 0.23885(7)  | 0.0194(7)     |
| C(1a5) | 0.44275(14) | 0.66420(19) | 0.24301(7)  | 0.0209(7)     |
| C(1a6) | 0.40943(14) | 0.73021(18) | 0.27492(7)  | 0.0203(7)     |
| C(1a7) | 0.43993(14) | 0.75321(17) | 0.32681(7)  | 0.0185(7)     |
| C(1a8) | 0.50854(14) | 0.71155(17) | 0.35986(7)  | 0.0179(6)     |
| C(1b1) | 0.65808(14) | 0.62778(19) | 0.37047(7)  | 0.0215(7)     |
| C(1b2) | 0.68935(14) | 0.61614(19) | 0.34835(7)  | 0.0224(7)     |
| C(1b3) | 0.63739(14) | 0.60420(18) | 0.23972(7)  | 0.0211(7)     |
| C(1b4) | 0.58535(14) | 0.60097(19) | 0.22168(7)  | 0.0218(7)     |
| C(1b5) | 0.38561(15) | 0.6875(2)   | 0.22973(7)  | 0.0250(8)     |
| C(1b6) | 0.36598(15) | 0.7295(2)   | 0.24887(7)  | 0.0246(8)     |
| C(1b7) | 0.42931(15) | 0.77818(18) | 0.35473(7)  | 0.0218(7)     |
| C(1b8) | 0.47089(14) | 0.75107(18) | 0.37529(7)  | 0.0198(7)     |
| C(1m1) | 0.66632(14) | 0.62253(18) | 0.29342(7)  | 0.0196(7)     |
| C(1m2) | 0.48151(14) | 0.63061(18) | 0.22764(7)  | 0.0195(7)     |
| C(1m3) | 0.40289(14) | 0.76477(18) | 0.30035(7)  | 0.0193(7)     |
| C(1m4) | 0.55976(14) | 0.68035(18) | 0.37322(7)  | 0.0181(6)     |
| C(11)  | 0.55868(14) | 0.76126(19) | 0.29225(7)  | 0.0202(7)     |
| C(12)  | 0.50355(13) | 0.58232(18) | 0.30984(7)  | 0.0198(7)     |
| C(13)  | 0.72949(14) | 0.60778(19) | 0.29108(7)  | 0.0210(7)     |
| C(14)  | 0.75171(15) | 0.5432(2)   | 0.29443(8)  | 0.0244(7)     |
| C(15)  | 0.71296(17) | 0.4849(2)   | 0.29892(10) | 0.0355(9)     |
| C(16)  | 0.81157(16) | 0.5325(2)   | 0.29347(8)  | 0.0290(8)     |

**Table S21.** Continued

| atom   | <i>x</i>    | <i>y</i>    | <i>z</i>    | <i>U</i> (eq) |
|--------|-------------|-------------|-------------|---------------|
| C(17)  | 0.84903(15) | 0.5839(2)   | 0.28873(8)  | 0.0297(8)     |
| C(18)  | 0.91361(17) | 0.5709(3)   | 0.28792(11) | 0.0460(12)    |
| C(19)  | 0.82590(15) | 0.6473(2)   | 0.28478(7)  | 0.0272(8)     |
| C(110) | 0.76640(15) | 0.6607(2)   | 0.28583(7)  | 0.0233(7)     |
| C(111) | 0.74258(17) | 0.7300(2)   | 0.28147(10) | 0.0340(9)     |
| C(112) | 0.45995(14) | 0.60925(19) | 0.19662(7)  | 0.0202(7)     |
| C(113) | 0.43667(14) | 0.54561(19) | 0.19128(7)  | 0.0220(7)     |
| C(114) | 0.43333(17) | 0.4975(2)   | 0.21596(8)  | 0.0293(8)     |
| C(115) | 0.41523(15) | 0.5271(2)   | 0.16242(8)  | 0.0248(7)     |
| C(116) | 0.41579(15) | 0.5708(2)   | 0.13922(7)  | 0.0259(8)     |
| C(117) | 0.3893(2)   | 0.5510(2)   | 0.10832(8)  | 0.0382(10)    |
| C(118) | 0.43976(16) | 0.6331(2)   | 0.14497(7)  | 0.0253(8)     |
| C(119) | 0.46256(14) | 0.65297(19) | 0.17319(7)  | 0.0227(7)     |
| C(120) | 0.48940(18) | 0.7208(2)   | 0.17858(9)  | 0.0312(8)     |
| C(121) | 0.35677(14) | 0.81789(18) | 0.29841(7)  | 0.0194(7)     |
| C(122) | 0.29938(15) | 0.80619(19) | 0.30430(7)  | 0.0227(7)     |
| C(123) | 0.28120(18) | 0.7389(2)   | 0.31380(11) | 0.0380(10)    |
| C(124) | 0.25841(15) | 0.8580(2)   | 0.30066(7)  | 0.0243(7)     |
| C(125) | 0.27214(16) | 0.9199(2)   | 0.29138(7)  | 0.0252(8)     |
| C(126) | 0.22688(18) | 0.9754(2)   | 0.28718(9)  | 0.0352(9)     |
| C(127) | 0.32915(16) | 0.93103(19) | 0.28612(8)  | 0.0261(8)     |
| C(128) | 0.37192(15) | 0.88142(19) | 0.28971(7)  | 0.0223(7)     |
| C(129) | 0.43360(16) | 0.8969(2)   | 0.28486(9)  | 0.0310(8)     |
| C(130) | 0.57185(14) | 0.67871(18) | 0.40607(7)  | 0.0186(7)     |
| C(131) | 0.53979(14) | 0.63529(18) | 0.42127(7)  | 0.0198(7)     |
| C(132) | 0.49216(15) | 0.5917(2)   | 0.40506(8)  | 0.0255(8)     |
| C(133) | 0.55169(14) | 0.63271(19) | 0.45190(7)  | 0.0219(7)     |
| C(134) | 0.59451(15) | 0.6729(2)   | 0.46743(7)  | 0.0246(8)     |
| C(135) | 0.60752(17) | 0.6693(2)   | 0.50049(8)  | 0.0313(9)     |
| C(136) | 0.62496(15) | 0.7169(2)   | 0.45194(8)  | 0.0256(8)     |
| C(137) | 0.61474(14) | 0.72071(19) | 0.42150(7)  | 0.0221(7)     |
| C(138) | 0.64896(18) | 0.7696(2)   | 0.40578(9)  | 0.0326(9)     |
| C(139) | 0.61312(16) | 0.3649(2)   | 0.32293(8)  | 0.0293(8)     |
| C(140) | 0.57054(15) | 0.3947(2)   | 0.29805(8)  | 0.0283(8)     |



**Table S21.** Continued

| atom   | <i>x</i>    | <i>y</i>    | <i>z</i>    | <i>U</i> (eq) |
|--------|-------------|-------------|-------------|---------------|
| C(141) | 0.47086(16) | 0.3893(2)   | 0.27567(8)  | 0.0278(8)     |
| C(142) | 0.41462(16) | 0.3513(2)   | 0.27698(8)  | 0.0293(8)     |
| C(143) | 0.34254(16) | 0.3321(2)   | 0.30783(8)  | 0.0311(9)     |
| C(144) | 0.31740(16) | 0.3607(2)   | 0.33321(8)  | 0.0297(8)     |
| C(145) | 0.34128(18) | 0.3790(2)   | 0.38451(9)  | 0.0344(9)     |
| C(146) | 0.38867(18) | 0.3630(2)   | 0.40978(8)  | 0.0324(9)     |
| C(147) | 0.48889(18) | 0.3800(2)   | 0.42782(8)  | 0.0327(9)     |
| C(148) | 0.54089(18) | 0.4240(2)   | 0.42605(8)  | 0.0318(9)     |
| C(149) | 0.60695(16) | 0.4509(2)   | 0.39243(8)  | 0.0305(8)     |
| C(150) | 0.61108(16) | 0.4472(2)   | 0.36044(8)  | 0.0269(8)     |
| O(1)   | 0.39161(11) | 0.37147(15) | 0.30270(5)  | 0.0281(6)     |
| O(2)   | 0.36274(11) | 0.36069(14) | 0.35810(5)  | 0.0264(6)     |
| O(3)   | 0.44016(12) | 0.40215(14) | 0.40747(5)  | 0.0279(6)     |
| O(4)   | 0.55069(11) | 0.42553(15) | 0.39641(6)  | 0.0306(6)     |
| O(5)   | 0.59999(11) | 0.38005(14) | 0.35152(6)  | 0.0286(6)     |
| O(6)   | 0.51355(10) | 0.36874(14) | 0.29971(5)  | 0.0259(6)     |
| Fe(2)  | 0.81163(2)  | 0.29145(3)  | 0.03675(1)  | 0.0177(1)     |
| K(2)   | 0.86980(3)  | 0.55293(5)  | -0.00766(2) | 0.0282(2)     |
| N(21)  | 0.73932(12) | 0.31776(15) | 0.01040(6)  | 0.0195(6)     |
| N(22)  | 0.84656(11) | 0.25729(14) | 0.00324(6)  | 0.0175(6)     |
| N(23)  | 0.88368(12) | 0.26811(16) | 0.06286(6)  | 0.0223(6)     |
| N(24)  | 0.77673(12) | 0.32278(16) | 0.07072(6)  | 0.0208(6)     |
| N(25)  | 0.76014(15) | 0.14816(19) | 0.03686(8)  | 0.0343(8)     |
| N(26)  | 0.85205(14) | 0.43369(17) | 0.02137(7)  | 0.0290(7)     |
| C(2a1) | 0.68779(14) | 0.33947(18) | 0.01843(7)  | 0.0201(7)     |
| C(2a2) | 0.73451(14) | 0.32559(18) | -0.01931(7) | 0.0200(7)     |
| C(2a3) | 0.82543(14) | 0.26646(18) | -0.02575(7) | 0.0192(7)     |
| C(2a4) | 0.89318(14) | 0.21418(18) | 0.00436(7)  | 0.0198(7)     |
| C(2a5) | 0.92750(14) | 0.22616(19) | 0.05675(7)  | 0.0231(7)     |
| C(2a6) | 0.90156(15) | 0.2927(2)   | 0.09055(7)  | 0.0270(8)     |
| C(2a7) | 0.80566(15) | 0.3350(2)   | 0.09821(7)  | 0.0242(7)     |
| C(2a8) | 0.71813(14) | 0.33487(19) | 0.07173(7)  | 0.0217(7)     |
| C(2b1) | 0.64917(14) | 0.36272(19) | -0.00704(7) | 0.0220(7)     |
| C(2b2) | 0.67844(15) | 0.35579(19) | -0.03017(8) | 0.0239(7)     |

**Table S21.** Continued

| atom   | <i>x</i>    | <i>y</i>    | <i>z</i>     | <i>U</i> (eq) |
|--------|-------------|-------------|--------------|---------------|
| C(2b3) | 0.86091(15) | 0.22992(19) | -0.04346(7)  | 0.0223(7)     |
| C(2b4) | 0.90185(15) | 0.19634(19) | -0.02492(7)  | 0.0226(7)     |
| C(2b5) | 0.97373(15) | 0.2240(2)   | 0.08147(8)   | 0.0302(9)     |
| C(2b6) | 0.95905(16) | 0.2667(2)   | 0.10169(8)   | 0.0343(10)    |
| C(2b7) | 0.76387(15) | 0.3534(2)   | 0.11748(8)   | 0.0254(8)     |
| C(2b8) | 0.70984(15) | 0.35089(19) | 0.10116(7)   | 0.0235(7)     |
| C(2m1) | 0.77451(14) | 0.30163(18) | -0.03685(7)  | 0.0196(7)     |
| C(2m2) | 0.93038(14) | 0.19547(18) | 0.02989(7)   | 0.0202(7)     |
| C(2m3) | 0.86620(15) | 0.3275(2)   | 0.10745(8)   | 0.0267(8)     |
| C(2m4) | 0.67513(13) | 0.34254(18) | 0.04721(7)   | 0.0193(7)     |
| C(21)  | 0.77832(14) | 0.2017(2)   | 0.03834(7)   | 0.0230(7)     |
| C(22)  | 0.83971(14) | 0.38165(19) | 0.02907(7)   | 0.0222(7)     |
| C(23)  | 0.76053(15) | 0.31131(19) | -0.06934(7)  | 0.0232(7)     |
| C(24)  | 0.79087(16) | 0.3592(2)   | -0.08294(7)  | 0.0260(8)     |
| C(25)  | 0.83751(18) | 0.4018(2)   | -0.06537(9)  | 0.0334(9)     |
| C(26)  | 0.77750(18) | 0.3685(2)   | -0.11312(8)  | 0.0357(9)     |
| C(27)  | 0.7347(2)   | 0.3314(3)   | -0.13008(8)  | 0.0424(11)    |
| C(28)  | 0.7199(3)   | 0.3437(3)   | -0.16271(9)  | 0.0657(18)    |
| C(29)  | 0.70498(19) | 0.2838(3)   | -0.11636(9)  | 0.0443(11)    |
| C(210) | 0.71673(16) | 0.2722(2)   | -0.08611(8)  | 0.0316(9)     |
| C(211) | 0.6834(2)   | 0.2200(3)   | -0.07246(11) | 0.0472(12)    |
| C(212) | 0.97657(14) | 0.14295(18) | 0.02884(7)   | 0.0211(7)     |
| C(213) | 1.03271(15) | 0.15885(19) | 0.02257(7)   | 0.0225(7)     |
| C(214) | 1.04788(16) | 0.2279(2)   | 0.01398(9)   | 0.0318(9)     |
| C(215) | 1.07575(15) | 0.10941(19) | 0.02458(8)   | 0.0243(7)     |
| C(216) | 1.06439(16) | 0.0451(2)   | 0.03242(8)   | 0.0292(8)     |
| C(217) | 1.11125(19) | -0.0077(2)  | 0.03509(11)  | 0.0400(10)    |
| C(218) | 1.00765(17) | 0.0299(2)   | 0.03736(9)   | 0.0325(9)     |
| C(219) | 0.96371(16) | 0.0778(2)   | 0.03611(9)   | 0.0297(8)     |
| C(220) | 0.90338(18) | 0.0579(2)   | 0.04258(11)  | 0.0408(11)    |
| C(221) | 0.89120(15) | 0.3585(2)   | 0.13622(8)   | 0.0304(9)     |
| C(222) | 0.90654(16) | 0.4254(2)   | 0.13634(9)   | 0.0341(10)    |
| C(223) | 0.90163(19) | 0.4652(3)   | 0.10853(10)  | 0.0410(10)    |
| C(224) | 0.92629(18) | 0.4564(3)   | 0.16317(10)  | 0.0413(11)    |

**Table S21.** Continued

| atom   | <i>x</i>    | <i>y</i>    | <i>z</i>     | <i>U</i> (eq) |
|--------|-------------|-------------|--------------|---------------|
| C(225) | 0.93104(18) | 0.4218(3)   | 0.18946(9)   | 0.0443(12)    |
| C(226) | 0.9525(2)   | 0.4550(3)   | 0.21873(11)  | 0.0629(17)    |
| C(227) | 0.91585(17) | 0.3558(3)   | 0.18879(9)   | 0.0398(11)    |
| C(228) | 0.89629(16) | 0.3221(2)   | 0.16258(8)   | 0.0335(9)     |
| C(229) | 0.8810(2)   | 0.2507(3)   | 0.16316(9)   | 0.0442(11)    |
| C(230) | 0.61382(13) | 0.35976(18) | 0.05186(7)   | 0.0189(7)     |
| C(231) | 0.59931(14) | 0.42378(18) | 0.06003(7)   | 0.0211(7)     |
| C(232) | 0.64413(17) | 0.4789(2)   | 0.06436(9)   | 0.0306(8)     |
| C(233) | 0.54156(15) | 0.43696(19) | 0.06425(7)   | 0.0241(7)     |
| C(234) | 0.49833(15) | 0.3883(2)   | 0.06055(8)   | 0.0255(8)     |
| C(235) | 0.43648(17) | 0.4043(3)   | 0.06559(11)  | 0.0425(11)    |
| C(236) | 0.51331(14) | 0.32529(19) | 0.05242(7)   | 0.0234(7)     |
| C(237) | 0.57073(14) | 0.31023(18) | 0.04786(7)   | 0.0207(7)     |
| C(238) | 0.58551(17) | 0.2409(2)   | 0.03932(10)  | 0.0358(9)     |
| C(239) | 0.98708(18) | 0.6235(2)   | 0.04338(9)   | 0.0360(9)     |
| C(240) | 0.93381(17) | 0.6470(2)   | 0.05618(9)   | 0.0324(9)     |
| C(241) | 0.83744(17) | 0.6142(2)   | 0.06223(9)   | 0.0311(8)     |
| C(242) | 0.78900(17) | 0.5675(2)   | 0.05064(8)   | 0.0321(9)     |
| C(243) | 0.72797(18) | 0.5366(3)   | 0.00695(10)  | 0.0417(11)    |
| C(244) | 0.71019(18) | 0.5553(3)   | −0.02437(10) | 0.0400(10)    |
| C(245) | 0.7463(2)   | 0.5683(3)   | −0.06910(10) | 0.0506(13)    |
| C(248) | 1.00795(18) | 0.6063(2)   | −0.03324(10) | 0.0387(10)    |
| C(249) | 1.02222(18) | 0.6023(3)   | −0.00081(10) | 0.0439(11)    |
| O(7)   | 0.97328(11) | 0.62132(14) | 0.01244(6)   | 0.0303(6)     |
| O(8)   | 0.88730(11) | 0.60143(14) | 0.04805(6)   | 0.0304(6)     |
| O(9)   | 0.77088(12) | 0.58168(15) | 0.02028(6)   | 0.0331(6)     |
| O(10)  | 0.75893(13) | 0.55262(19) | −0.03911(6)  | 0.0465(8)     |
| C(1a)  | 0.9454(3)   | 0.5590(4)   | −0.07417(13) | 0.0327(14)    |
| C(27a) | 0.8967(4)   | 0.6051(5)   | −0.0831(2)   | 0.047(2)      |
| C(26a) | 0.7953(4)   | 0.6072(5)   | −0.07938(18) | 0.046(2)      |
| O(11a) | 0.8457(2)   | 0.5740(2)   | −0.07221(10) | 0.0399(10)    |
| O(12a) | 0.9648(5)   | 0.5561(5)   | −0.0434(3)   | 0.0327(17)    |
| C(1b)  | 0.9350(7)   | 0.6142(10)  | −0.0723(3)   | 0.051(4)      |
| C(27b) | 0.8749(8)   | 0.5998(12)  | −0.0814(5)   | 0.047(2)      |

**Table S21.** Continued

| atom   | <i>x</i>     | <i>y</i>    | <i>z</i>   | <i>U</i> (eq) |
|--------|--------------|-------------|------------|---------------|
| C(26b) | 0.7800(8)    | 0.6256(10)  | -0.0716(4) | 0.046(2)      |
| O(11b) | 0.8448(4)    | 0.6285(5)   | -0.0618(2) | 0.0399(10)    |
| O(12b) | 0.9543(10)   | 0.5793(11)  | -0.0428(5) | 0.047(5)      |
| Fe(3)  | 0.14088(2)   | 0.28303(3)  | 0.36906(1) | 0.0174(1)     |
| K(3)   | 0.21722(4)   | 0.53676(4)  | 0.32811(2) | 0.0292(2)     |
| N(31)  | 0.07236(12)  | 0.31289(15) | 0.34098(6) | 0.0201(6)     |
| N(32)  | 0.17810(12)  | 0.24491(15) | 0.33704(6) | 0.0189(6)     |
| N(33)  | 0.20963(12)  | 0.25560(15) | 0.39691(6) | 0.0185(6)     |
| N(34)  | 0.10405(12)  | 0.31906(15) | 0.40136(6) | 0.0194(6)     |
| N(35)  | 0.07653(15)  | 0.14648(19) | 0.36853(8) | 0.0359(8)     |
| N(36)  | 0.19454(14)  | 0.42136(18) | 0.35682(7) | 0.0300(7)     |
| C(3a1) | 0.01985(14)  | 0.33613(19) | 0.34737(7) | 0.0230(7)     |
| C(3a2) | 0.07003(14)  | 0.31724(19) | 0.31114(7) | 0.0218(7)     |
| C(3a3) | 0.16014(15)  | 0.25400(18) | 0.30768(7) | 0.0213(7)     |
| C(3a4) | 0.22356(14)  | 0.19994(18) | 0.33962(7) | 0.0202(7)     |
| C(3a5) | 0.25193(14)  | 0.20986(19) | 0.39263(7) | 0.0203(7)     |
| C(3a6) | 0.22554(14)  | 0.28037(18) | 0.42481(7) | 0.0201(7)     |
| C(3a7) | 0.13136(14)  | 0.33293(18) | 0.42901(7) | 0.0201(7)     |
| C(3a8) | 0.04590(14)  | 0.33672(19) | 0.40053(7) | 0.0205(7)     |
| C(3b1) | -0.01645(15) | 0.3571(2)   | 0.32082(8) | 0.0284(8)     |
| C(3b2) | 0.01487(15)  | 0.3470(2)   | 0.29857(8) | 0.0285(8)     |
| C(3b3) | 0.19691(15)  | 0.21530(19) | 0.29121(7) | 0.0235(7)     |
| C(3b4) | 0.23522(15)  | 0.18090(19) | 0.31084(7) | 0.0240(7)     |
| C(3b5) | 0.29441(14)  | 0.20472(19) | 0.41864(7) | 0.0225(7)     |
| C(3b6) | 0.27987(14)  | 0.2497(2)   | 0.43805(7) | 0.0232(7)     |
| C(3b7) | 0.08933(15)  | 0.35900(19) | 0.44636(7) | 0.0227(7)     |
| C(3b8) | 0.03626(15)  | 0.35871(19) | 0.42922(7) | 0.0238(7)     |
| C(3m1) | 0.11133(14)  | 0.29031(19) | 0.29514(7) | 0.0209(7)     |
| C(3m2) | 0.25715(14)  | 0.17970(18) | 0.36600(7) | 0.0204(7)     |
| C(3m3) | 0.19056(14)  | 0.32053(18) | 0.43985(7) | 0.0199(7)     |
| C(3m4) | 0.00473(14)  | 0.34292(18) | 0.37547(7) | 0.0206(7)     |
| C(31)  | 0.10062(15)  | 0.1970(2)   | 0.36996(7) | 0.0237(7)     |
| C(32)  | 0.17641(14)  | 0.37044(19) | 0.36277(7) | 0.0213(7)     |
| C(33)  | 0.09907(15)  | 0.29587(19) | 0.26238(8) | 0.0240(7)     |

**Table S21.** Continued

| atom   | $x$          | $y$         | $z$         | $U(\text{eq})$ |
|--------|--------------|-------------|-------------|----------------|
| C(34)  | 0.12996(17)  | 0.3417(2)   | 0.24807(8)  | 0.0287(8)      |
| C(35)  | 0.17640(19)  | 0.3854(2)   | 0.26478(10) | 0.0384(9)      |
| C(36)  | 0.11722(19)  | 0.3473(2)   | 0.21772(9)  | 0.0369(9)      |
| C(37)  | 0.0740(2)    | 0.3081(2)   | 0.20167(10) | 0.0400(9)      |
| C(38)  | 0.0601(3)    | 0.3150(3)   | 0.16870(12) | 0.0598(14)     |
| C(39)  | 0.0448(2)    | 0.2627(2)   | 0.21630(10) | 0.0402(9)      |
| C(310) | 0.05598(17)  | 0.2551(2)   | 0.24637(9)  | 0.0328(8)      |
| C(311) | 0.0236(2)    | 0.2035(3)   | 0.26169(12) | 0.0537(14)     |
| C(312) | 0.30083(14)  | 0.12454(18) | 0.36454(7)  | 0.0203(7)      |
| C(313) | 0.36130(15)  | 0.13695(19) | 0.36562(7)  | 0.0224(7)      |
| C(314) | 0.38701(17)  | 0.2055(2)   | 0.36960(10) | 0.0344(9)      |
| C(315) | 0.39957(15)  | 0.0841(2)   | 0.36312(7)  | 0.0248(8)      |
| C(316) | 0.37966(16)  | 0.0195(2)   | 0.35905(7)  | 0.0250(8)      |
| C(317) | 0.42197(18)  | -0.0368(2)  | 0.35710(9)  | 0.0345(9)      |
| C(318) | 0.31941(16)  | 0.0080(2)   | 0.35776(8)  | 0.0262(8)      |
| C(319) | 0.27980(15)  | 0.05922(19) | 0.36066(7)  | 0.0238(7)      |
| C(320) | 0.21532(17)  | 0.0438(2)   | 0.35964(9)  | 0.0333(9)      |
| C(321) | 0.21546(14)  | 0.35249(19) | 0.46844(7)  | 0.0224(7)      |
| C(322) | 0.22992(14)  | 0.4199(2)   | 0.46785(8)  | 0.0245(8)      |
| C(323) | 0.22287(16)  | 0.4587(2)   | 0.43953(8)  | 0.0281(8)      |
| C(324) | 0.25136(15)  | 0.4521(2)   | 0.49415(8)  | 0.0290(8)      |
| C(325) | 0.25869(15)  | 0.4183(2)   | 0.52087(8)  | 0.0286(8)      |
| C(326) | 0.28371(19)  | 0.4533(3)   | 0.54894(9)  | 0.0413(11)     |
| C(327) | 0.24269(15)  | 0.3521(2)   | 0.52095(8)  | 0.0276(8)      |
| C(328) | 0.22107(14)  | 0.3179(2)   | 0.49525(7)  | 0.0249(8)      |
| C(329) | 0.20490(17)  | 0.2460(2)   | 0.49692(8)  | 0.0316(9)      |
| C(330) | -0.05716(14) | 0.36200(19) | 0.37855(7)  | 0.0216(7)      |
| C(331) | -0.07446(16) | 0.4287(2)   | 0.37884(9)  | 0.0294(8)      |
| C(332) | -0.0311(2)   | 0.4840(2)   | 0.37740(13) | 0.0496(12)     |
| C(333) | -0.13318(17) | 0.4436(2)   | 0.38124(9)  | 0.0341(9)      |
| C(334) | -0.17393(15) | 0.3946(2)   | 0.38345(8)  | 0.0300(9)      |
| C(335) | -0.23669(18) | 0.4124(3)   | 0.38718(12) | 0.0478(12)     |
| C(336) | -0.15623(15) | 0.3290(2)   | 0.38334(7)  | 0.0255(8)      |
| C(337) | -0.09828(14) | 0.31195(19) | 0.38111(7)  | 0.0220(7)      |

**Table S21.** Continued

| atom   | $x$          | $y$         | $z$         | $U(\text{eq})$ |
|--------|--------------|-------------|-------------|----------------|
| C(338) | -0.08014(17) | 0.2399(2)   | 0.38292(10) | 0.0343(9)      |
| O(13)  | 0.22199(14)  | 0.59702(18) | 0.38183(7)  | 0.0281(7)      |
| O(14)  | 0.11388(14)  | 0.58211(19) | 0.34595(7)  | 0.0323(8)      |
| O(15)  | 0.12249(18)  | 0.5619(3)   | 0.28785(10) | 0.0441(11)     |
| O(17)  | 0.32271(17)  | 0.52209(19) | 0.30399(9)  | 0.0402(9)      |
| O(18)  | 0.31624(14)  | 0.60646(18) | 0.35228(8)  | 0.0264(7)      |
| C(339) | 0.1675(2)    | 0.6125(3)   | 0.39205(12) | 0.0311(12)     |
| C(340) | 0.1213(2)    | 0.5674(3)   | 0.37681(11) | 0.0321(11)     |
| C(341) | 0.0740(4)    | 0.5376(7)   | 0.3293(2)   | 0.040(2)       |
| C(342) | 0.0668(2)    | 0.5615(4)   | 0.29776(12) | 0.0454(15)     |
| C(343) | 0.1194(3)    | 0.5754(5)   | 0.25800(15) | 0.056(2)       |
| C(344) | 0.1801(4)    | 0.5882(4)   | 0.25007(16) | 0.0528(19)     |
| C(2a)  | 0.2796(5)    | 0.5444(6)   | 0.25491(17) | 0.046(2)       |
| O(16a) | 0.22173(19)  | 0.5421(2)   | 0.26410(10) | 0.0371(16)     |
| C(2b)  | 0.275(3)     | 0.552(3)    | 0.2612(11)  | 0.046(2)       |
| O(16b) | 0.2154(11)   | 0.6037(14)  | 0.2661(6)   | 0.048(9)       |
| C(345) | 0.3180(3)    | 0.5003(4)   | 0.27489(14) | 0.0511(16)     |
| C(346) | 0.3571(3)    | 0.5797(3)   | 0.30965(14) | 0.0311(14)     |
| C(347) | 0.3697(2)    | 0.5901(3)   | 0.34200(11) | 0.0361(12)     |
| C(348) | 0.3233(2)    | 0.6195(3)   | 0.38310(12) | 0.0310(12)     |
| C(349) | 0.2669(3)    | 0.6448(5)   | 0.39042(18) | 0.0325(15)     |
| O(19)  | 0.1557(6)    | 0.6176(8)   | 0.3634(3)   | 0.035(3)       |
| O(20)  | 0.0882(11)   | 0.5292(17)  | 0.3241(7)   | 0.041(7)       |
| O(21)  | 0.1320(10)   | 0.5493(11)  | 0.2725(6)   | 0.058(5)       |
| O(22)  | 0.2536(7)    | 0.5780(9)   | 0.2773(4)   | 0.043(4)       |
| O(23)  | 0.3263(7)    | 0.5352(9)   | 0.3270(3)   | 0.044(4)       |
| O(24)  | 0.2774(6)    | 0.5958(9)   | 0.3723(3)   | 0.043(4)       |
| C(350) | 0.0985(11)   | 0.5939(16)  | 0.3677(6)   | 0.050(6)       |
| C(351) | 0.0652(11)   | 0.5846(13)  | 0.3375(5)   | 0.044(5)       |
| C(352) | 0.0593(13)   | 0.5070(17)  | 0.2972(6)   | 0.062(7)       |
| C(353) | 0.0727(11)   | 0.5505(15)  | 0.2746(6)   | 0.056(7)       |
| C(354) | 0.1541(14)   | 0.5986(14)  | 0.2557(6)   | 0.039(6)       |
| C(355) | 0.2133(13)   | 0.5801(18)  | 0.2498(6)   | 0.0528(19)     |
| C(356) | 0.3079(10)   | 0.5527(16)  | 0.2747(6)   | 0.0511(16)     |

**Table S21.** Continued

| atom   | <i>x</i>    | <i>y</i>    | <i>z</i>    | <i>U</i> (eq) |
|--------|-------------|-------------|-------------|---------------|
| C(357) | 0.3519(14)  | 0.5612(18)  | 0.3032(6)   | 0.0311(14)    |
| C(358) | 0.3604(10)  | 0.5463(11)  | 0.3532(5)   | 0.040(5)      |
| C(359) | 0.3363(11)  | 0.6044(13)  | 0.3699(7)   | 0.043(6)      |
| C(360) | 0.2524(14)  | 0.650(2)    | 0.3865(9)   | 0.0325(15)    |
| C(361) | 0.1903(13)  | 0.6276(18)  | 0.3909(6)   | 0.052(8)      |
| O(26)  | 0.73692(18) | 0.96437(18) | 0.35327(8)  | 0.0735(18)    |
| C(45)  | 0.69771(16) | 0.91361(19) | 0.36036(7)  | 0.0183(9)     |
| C(46)  | 0.7056(2)   | 0.85776(15) | 0.33934(10) | 0.0574(19)    |
| C(47)  | 0.7212(2)   | 0.8933(2)   | 0.31239(8)  | 0.0494(17)    |
| C(48)  | 0.7287(2)   | 0.9654(2)   | 0.32177(8)  | 0.0429(15)    |
| O(27)  | 0.48460(14) | 0.58858(17) | 0.04256(7)  | 0.0439(8)     |
| C(49)  | 0.4971(3)   | 0.6491(3)   | 0.05784(11) | 0.0570(14)    |
| C(50)  | 0.5292(3)   | 0.6928(3)   | 0.03848(11) | 0.0495(12)    |
| C(51)  | 0.5621(2)   | 0.6426(2)   | 0.02275(10) | 0.0424(11)    |
| C(52)  | 0.51842(19) | 0.5854(2)   | 0.01870(9)  | 0.0376(10)    |
| O(28)  | 0.1874(3)   | 0.8248(4)   | 0.19494(14) | 0.089(2)      |
| C(53)  | 0.1752(4)   | 0.8405(4)   | 0.22664(14) | 0.059(2)      |
| C(54)  | 0.1667(5)   | 0.7741(4)   | 0.23863(17) | 0.065(2)      |
| C(55)  | 0.1684(4)   | 0.7278(3)   | 0.21660(15) | 0.063(2)      |
| C(56)  | 0.1580(3)   | 0.7590(4)   | 0.19000(16) | 0.0503(18)    |
| O(30)  | 0.8254(3)   | 0.7145(3)   | 0.35787(13) | 0.0807(17)    |
| C(61)  | 0.8563(2)   | 0.6506(3)   | 0.36528(11) | 0.0351(12)    |
| C(62)  | 0.8484(3)   | 0.6389(3)   | 0.39759(13) | 0.0462(14)    |
| C(63)  | 0.8400(3)   | 0.7078(3)   | 0.40819(13) | 0.0500(15)    |
| C(64)  | 0.8387(2)   | 0.7516(3)   | 0.38344(10) | 0.0321(11)    |
| O(25)  | 0.43252(12) | 0.48440(15) | 0.47400(6)  | 0.0350(7)     |
| C(41)  | 0.38232(16) | 0.5037(2)   | 0.45319(9)  | 0.0304(8)     |
| C(42)  | 0.37266(19) | 0.5758(2)   | 0.46004(9)  | 0.0345(9)     |
| C(43)  | 0.3943(2)   | 0.5813(2)   | 0.49307(9)  | 0.0397(10)    |
| C(44)  | 0.42174(19) | 0.5137(2)   | 0.50120(9)  | 0.0384(10)    |
| O(29a) | 0.8970(3)   | 0.0149(3)   | 0.37123(11) | 0.0714(18)    |
| C(57a) | 0.9026(3)   | -0.0345(2)  | 0.34954(12) | 0.060(2)      |
| C(58a) | 0.9091(2)   | 0.0121(2)   | 0.32200(9)  | 0.0528(18)    |
| C(59a) | 0.9304(2)   | 0.0796(2)   | 0.33441(11) | 0.059(2)      |

**Table S21.** Continued

| atom   | <i>x</i>  | <i>y</i>  | <i>z</i>     | <i>U</i> (eq) |
|--------|-----------|-----------|--------------|---------------|
| C(60a) | 0.9353(3) | 0.0672(3) | 0.37075(10)  | 0.069(3)      |
| O(29b) | 0.9450(3) | 0.0654(3) | 0.30736(11)  | 0.0714(18)    |
| C(57b) | 0.9251(3) | 0.0033(2) | 0.31779(10)  | 0.060(2)      |
| C(58b) | 0.9199(2) | 0.0039(2) | 0.35012(9)   | 0.0528(18)    |
| C(59b) | 0.9420(3) | 0.0728(3) | 0.36030(10)  | 0.059(2)      |
| C(60b) | 0.9500(3) | 0.1086(2) | 0.33225(13)  | 0.069(3)      |
| O(31)  | 0.7666(2) | 0.1084(3) | −0.02445(10) | 0.0414(12)    |
| O(32)  | 0.5682(7) | 0.8663(6) | 0.3511(3)    | 0.063(4)      |

<sup>a</sup>*U*(eq) is defined as one third of the trace of the orthogonalized  $\mathbf{U}_{ij}$  tensor. The estimated standard deviations of the least significant digits are given in parentheses.



**Table S22.** Bond Lengths for 3[K(18-crown-6)][Fe(TMP)(CN)<sub>2</sub>] $\cdot$ 5.1(THF) $\cdot$ 0.9H<sub>2</sub>O<sup>a</sup>

| bond          | length (Å) | bond          | length (Å) |
|---------------|------------|---------------|------------|
| Fe(1)–C(11)   | 1.966(4)   | C(248)–H(24L) | 0.9411     |
| Fe(1)–N(13)   | 1.967(3)   | C(249)–O(7)   | 1.412(5)   |
| Fe(1)–N(14)   | 1.978(3)   | C(249)–H(18d) | 0.9900     |
| Fe(1)–N(11)   | 1.982(3)   | C(249)–H(18e) | 0.9900     |
| Fe(1)–N(12)   | 1.988(3)   | C(1a)–O(12a)  | 1.427(14)  |
| Fe(1)–C(12)   | 1.993(4)   | C(1a)–C(27a)  | 1.466(11)  |
| K(1)–O(4)     | 2.690(3)   | C(1a)–H(1a1)  | 0.9900     |
| K(1)–O(1)     | 2.692(3)   | C(1a)–H(1a2)  | 0.9900     |
| K(1)–O(2)     | 2.752(3)   | C(27a)–O(11a) | 1.483(9)   |
| K(1)–O(6)     | 2.765(3)   | C(27a)–H(27a) | 0.9900     |
| K(1)–N(16)    | 2.848(3)   | C(27a)–H(27b) | 0.9900     |
| K(1)–O(3)     | 2.896(3)   | C(26a)–O(11a) | 1.338(10)  |
| K(1)–O(5)     | 3.070(3)   | C(26a)–H(26b) | 0.9900     |
| N(11)–C(1a1)  | 1.368(4)   | C(26a)–H(26C) | 0.9900     |
| N(11)–C(1a2)  | 1.371(4)   | C(1b)–C(27b)  | 1.41(2)    |
| N(12)–C(1a4)  | 1.371(4)   | C(1b)–O(12b)  | 1.54(3)    |
| N(12)–C(1a3)  | 1.373(4)   | C(1b)–H(1b1)  | 0.9110     |
| N(13)–C(1a5)  | 1.378(4)   | C(1b)–H(1b2)  | 0.9110     |
| N(13)–C(1a6)  | 1.380(4)   | C(27b)–O(11b) | 1.35(2)    |
| N(14)–C(1a7)  | 1.371(4)   | C(27b)–H(27C) | 0.9900     |
| N(14)–C(1a8)  | 1.374(4)   | C(27b)–H(27d) | 0.9900     |
| N(15)–C(11)   | 1.158(5)   | C(26b)–O(11b) | 1.49(2)    |
| N(16)–C(12)   | 1.161(5)   | C(26b)–H(26d) | 0.9900     |
| C(1a1)–C(1m4) | 1.402(4)   | C(26b)–H(26e) | 0.9900     |
| C(1a1)–C(1b1) | 1.440(4)   | Fe(3)–N(34)   | 1.962(3)   |
| C(1a2)–C(1m1) | 1.400(4)   | Fe(3)–N(33)   | 1.965(3)   |
| C(1a2)–C(1b2) | 1.444(4)   | Fe(3)–C(31)   | 1.971(4)   |
| C(1a3)–C(1m1) | 1.392(4)   | Fe(3)–N(32)   | 1.972(3)   |
| C(1a3)–C(1b3) | 1.437(4)   | Fe(3)–N(31)   | 1.981(3)   |
| C(1a4)–C(1m2) | 1.398(4)   | Fe(3)–C(32)   | 1.984(4)   |
| C(1a4)–C(1b4) | 1.447(5)   | K(3)–O(23)    | 2.519(16)  |
| C(1a5)–C(1m2) | 1.395(5)   | K(3)–O(24)    | 2.583(16)  |
| C(1a5)–C(1b5) | 1.444(4)   | K(3)–O(15)    | 2.695(4)   |
| C(1a6)–C(1m3) | 1.394(5)   | K(3)–O(22)    | 2.736(17)  |

**Table S22.** Continued

| bond          | length (Å) | bond          | length (Å) |
|---------------|------------|---------------|------------|
| C(1a6)–C(1b6) | 1.446(4)   | K(3)–O(13)    | 2.751(3)   |
| C(1a7)–C(1m3) | 1.402(4)   | K(3)–N(36)    | 2.768(4)   |
| C(1a7)–C(1b7) | 1.439(5)   | K(3)–O(18)    | 2.768(4)   |
| C(1a8)–C(1m4) | 1.396(4)   | K(3)–O(14)    | 2.784(3)   |
| C(1a8)–C(1b8) | 1.441(5)   | K(3)–O(19)    | 2.828(14)  |
| C(1b1)–C(1b2) | 1.355(5)   | K(3)–O(17)    | 2.833(4)   |
| C(1b1)–H(1ba) | 0.9500     | K(3)–O(20)    | 2.95(2)    |
| C(1b2)–H(1bF) | 0.9500     | K(3)–O(16a)   | 2.976(5)   |
| C(1b3)–C(1b4) | 1.355(5)   | N(31)–C(3a1)  | 1.368(4)   |
| C(1b3)–H(1be) | 0.9500     | N(31)–C(3a2)  | 1.374(4)   |
| C(1b4)–H(1bd) | 0.9500     | N(32)–C(3a3)  | 1.370(4)   |
| C(1b5)–C(1b6) | 1.351(5)   | N(32)–C(3a4)  | 1.377(4)   |
| C(1b5)–H(1bg) | 0.9500     | N(33)–C(3a5)  | 1.377(4)   |
| C(1b6)–H(1bH) | 0.9500     | N(33)–C(3a6)  | 1.380(4)   |
| C(1b7)–C(1b8) | 1.359(5)   | N(34)–C(3a7)  | 1.366(4)   |
| C(1b7)–H(1bC) | 0.9500     | N(34)–C(3a8)  | 1.380(4)   |
| C(1b8)–H(1bb) | 0.9500     | N(35)–C(31)   | 1.158(5)   |
| C(1m1)–C(13)  | 1.503(4)   | N(36)–C(32)   | 1.158(5)   |
| C(1m2)–C(112) | 1.508(4)   | C(3a1)–C(3m4) | 1.399(5)   |
| C(1m3)–C(121) | 1.502(4)   | C(3a1)–C(3b1) | 1.441(5)   |
| C(1m4)–C(130) | 1.502(4)   | C(3a2)–C(3m1) | 1.398(5)   |
| C(13)–C(14)   | 1.400(5)   | C(3a2)–C(3b2) | 1.446(5)   |
| C(13)–C(110)  | 1.408(5)   | C(3a3)–C(3m1) | 1.393(5)   |
| C(14)–C(16)   | 1.402(5)   | C(3a3)–C(3b3) | 1.448(5)   |
| C(14)–C(15)   | 1.509(6)   | C(3a4)–C(3m2) | 1.403(5)   |
| C(15)–H(15i)  | 0.9800     | C(3a4)–C(3b4) | 1.447(5)   |
| C(15)–H(15j)  | 0.9800     | C(3a5)–C(3m2) | 1.393(5)   |
| C(15)–H(15K)  | 0.9800     | C(3a5)–C(3b5) | 1.435(4)   |
| C(16)–C(17)   | 1.387(6)   | C(3a6)–C(3m3) | 1.398(5)   |
| C(16)–H(16a)  | 0.9500     | C(3a6)–C(3b6) | 1.447(5)   |
| C(17)–C(19)   | 1.388(6)   | C(3a7)–C(3m3) | 1.402(4)   |
| C(17)–C(18)   | 1.515(5)   | C(3a7)–C(3b7) | 1.444(5)   |
| C(18)–H(18a)  | 0.9800     | C(3a8)–C(3m4) | 1.388(4)   |
| C(18)–H(18b)  | 0.9800     | C(3a8)–C(3b8) | 1.445(5)   |

**Table S22.** Continued

| bond          | length (Å) | bond          | length (Å) |
|---------------|------------|---------------|------------|
| C(18)–H(18C)  | 0.9800     | C(3b1)–C(3b2) | 1.355(5)   |
| C(19)–C(110)  | 1.404(5)   | C(3b1)–H(3bH) | 0.9500     |
| C(19)–H(19a)  | 0.9500     | C(3b2)–H(3bg) | 0.9500     |
| C(110)–C(111) | 1.504(6)   | C(3b3)–C(3b4) | 1.358(5)   |
| C(111)–H(11C) | 0.9800     | C(3b3)–H(3bC) | 0.9500     |
| C(111)–H(11d) | 0.9800     | C(3b4)–H(3ba) | 0.9500     |
| C(111)–H(11e) | 0.9800     | C(3b5)–C(3b6) | 1.352(5)   |
| C(112)–C(113) | 1.399(5)   | C(3b5)–H(3bd) | 0.9500     |
| C(112)–C(119) | 1.404(5)   | C(3b6)–H(3bF) | 0.9500     |
| C(113)–C(115) | 1.401(5)   | C(3b7)–C(3b8) | 1.353(5)   |
| C(113)–C(114) | 1.508(5)   | C(3b7)–H(3bb) | 0.9500     |
| C(114)–H(11F) | 0.9800     | C(3b8)–H(3be) | 0.9500     |
| C(114)–H(11g) | 0.9800     | C(3m1)–C(33)  | 1.501(5)   |
| C(114)–H(11H) | 0.9800     | C(3m2)–C(312) | 1.508(5)   |
| C(115)–C(116) | 1.389(5)   | C(3m3)–C(321) | 1.504(4)   |
| C(115)–H(11a) | 0.9500     | C(3m4)–C(330) | 1.502(4)   |
| C(116)–C(118) | 1.384(6)   | C(33)–C(34)   | 1.392(5)   |
| C(116)–C(117) | 1.519(5)   | C(33)–C(310)  | 1.411(5)   |
| C(117)–H(11i) | 0.9800     | C(34)–C(36)   | 1.393(5)   |
| C(117)–H(11j) | 0.9800     | C(34)–C(35)   | 1.507(6)   |
| C(117)–H(11K) | 0.9800     | C(35)–H(35a)  | 0.9800     |
| C(118)–C(119) | 1.390(5)   | C(35)–H(35b)  | 0.9800     |
| C(118)–H(11b) | 0.9500     | C(35)–H(35C)  | 0.9800     |
| C(119)–C(120) | 1.508(5)   | C(36)–C(37)   | 1.395(6)   |
| C(120)–H(12C) | 0.9800     | C(36)–H(36a)  | 0.9500     |
| C(120)–H(12d) | 0.9800     | C(37)–C(39)   | 1.372(7)   |
| C(120)–H(12e) | 0.9800     | C(37)–C(38)   | 1.516(7)   |
| C(121)–C(128) | 1.403(5)   | C(38)–H(38a)  | 0.9800     |
| C(121)–C(122) | 1.407(5)   | C(38)–H(38b)  | 0.9800     |
| C(122)–C(124) | 1.402(5)   | C(38)–H(38C)  | 0.9800     |
| C(122)–C(123) | 1.506(6)   | C(39)–C(310)  | 1.383(6)   |
| C(123)–H(12i) | 0.9800     | C(39)–H(39a)  | 0.9500     |
| C(123)–H(12j) | 0.9800     | C(310)–C(311) | 1.514(7)   |
| C(123)–H(12K) | 0.9800     | C(311)–H(31i) | 0.9800     |

**Table S22.** Continued

| bond          | length (Å) | bond          | length (Å) |
|---------------|------------|---------------|------------|
| C(124)–C(125) | 1.373(6)   | C(311)–H(31j) | 0.9800     |
| C(124)–H(12b) | 0.9500     | C(311)–H(31K) | 0.9800     |
| C(125)–C(127) | 1.387(5)   | C(312)–C(319) | 1.407(5)   |
| C(125)–C(126) | 1.521(5)   | C(312)–C(313) | 1.407(5)   |
| C(126)–H(12L) | 0.9800     | C(313)–C(315) | 1.399(5)   |
| C(126)–H(12m) | 0.9800     | C(313)–C(314) | 1.506(6)   |
| C(126)–H(12N) | 0.9800     | C(314)–H(31F) | 0.9800     |
| C(127)–C(128) | 1.396(5)   | C(314)–H(31g) | 0.9800     |
| C(127)–H(12a) | 0.9500     | C(314)–H(31H) | 0.9800     |
| C(128)–C(129) | 1.502(5)   | C(315)–C(316) | 1.386(6)   |
| C(129)–H(12F) | 0.9800     | C(315)–H(31a) | 0.9500     |
| C(129)–H(12g) | 0.9800     | C(316)–C(318) | 1.398(5)   |
| C(129)–H(12H) | 0.9800     | C(316)–C(317) | 1.507(5)   |
| C(130)–C(131) | 1.400(5)   | C(317)–H(31C) | 0.9800     |
| C(130)–C(137) | 1.412(5)   | C(317)–H(31d) | 0.9800     |
| C(131)–C(133) | 1.402(4)   | C(317)–H(31e) | 0.9800     |
| C(131)–C(132) | 1.514(5)   | C(318)–C(319) | 1.398(5)   |
| C(132)–H(13F) | 0.9800     | C(318)–H(31b) | 0.9500     |
| C(132)–H(13g) | 0.9800     | C(319)–C(320) | 1.510(5)   |
| C(132)–H(13H) | 0.9800     | C(320)–H(32L) | 0.9800     |
| C(133)–C(134) | 1.391(5)   | C(320)–H(32m) | 0.9800     |
| C(133)–H(13a) | 0.9500     | C(320)–H(32N) | 0.9800     |
| C(134)–C(136) | 1.393(6)   | C(321)–C(322) | 1.402(6)   |
| C(134)–C(135) | 1.514(5)   | C(321)–C(328) | 1.410(5)   |
| C(135)–H(13C) | 0.9800     | C(322)–C(324) | 1.401(5)   |
| C(135)–H(13d) | 0.9800     | C(322)–C(323) | 1.512(5)   |
| C(135)–H(13e) | 0.9800     | C(323)–H(32e) | 0.9800     |
| C(136)–C(137) | 1.393(5)   | C(323)–H(32F) | 0.9800     |
| C(136)–H(13b) | 0.9500     | C(323)–H(32g) | 0.9800     |
| C(137)–C(138) | 1.514(5)   | C(324)–C(325) | 1.398(6)   |
| C(138)–H(13i) | 0.9800     | C(324)–H(32H) | 0.9500     |
| C(138)–H(13j) | 0.9800     | C(325)–C(327) | 1.386(6)   |
| C(138)–H(13K) | 0.9800     | C(325)–C(326) | 1.513(5)   |
| C(139)–O(5)   | 1.430(5)   | C(326)–H(32i) | 0.9800     |

**Table S22.** Continued

| bond          | length (Å) | bond          | length (Å) |
|---------------|------------|---------------|------------|
| C(139)–C(140) | 1.519(5)   | C(326)–H(32j) | 0.9800     |
| C(139)–H(13L) | 0.9900     | C(326)–H(32K) | 0.9800     |
| C(139)–H(13m) | 0.9900     | C(327)–C(328) | 1.399(5)   |
| C(140)–O(6)   | 1.425(4)   | C(327)–H(32a) | 0.9500     |
| C(140)–H(14a) | 0.9900     | C(328)–C(329) | 1.503(6)   |
| C(140)–H(14b) | 0.9900     | C(329)–H(32b) | 0.9800     |
| C(141)–O(6)   | 1.431(4)   | C(329)–H(32C) | 0.9800     |
| C(141)–C(142) | 1.514(5)   | C(329)–H(32d) | 0.9800     |
| C(141)–H(43C) | 0.9900     | C(330)–C(337) | 1.401(5)   |
| C(141)–H(43d) | 0.9900     | C(330)–C(331) | 1.404(6)   |
| C(142)–O(1)   | 1.430(4)   | C(331)–C(333) | 1.405(5)   |
| C(142)–H(70a) | 0.9900     | C(331)–C(332) | 1.505(6)   |
| C(142)–H(70b) | 0.9900     | C(332)–H(33i) | 0.9800     |
| C(143)–O(1)   | 1.429(5)   | C(332)–H(33j) | 0.9800     |
| C(143)–C(144) | 1.497(5)   | C(332)–H(33K) | 0.9800     |
| C(143)–H(43a) | 0.9900     | C(333)–C(334) | 1.376(6)   |
| C(143)–H(43b) | 0.9900     | C(333)–H(33e) | 0.9500     |
| C(144)–O(2)   | 1.433(4)   | C(334)–C(336) | 1.385(6)   |
| C(144)–H(93a) | 0.9900     | C(334)–C(335) | 1.522(5)   |
| C(144)–H(93b) | 0.9900     | C(335)–H(33F) | 0.9800     |
| C(145)–O(2)   | 1.431(4)   | C(335)–H(33g) | 0.9800     |
| C(145)–C(146) | 1.510(6)   | C(335)–H(33H) | 0.9800     |
| C(145)–H(15e) | 1.0948     | C(336)–C(337) | 1.396(5)   |
| C(145)–H(15F) | 1.0948     | C(336)–H(33a) | 0.9500     |
| C(146)–O(3)   | 1.442(5)   | C(337)–C(338) | 1.511(6)   |
| C(146)–H(15C) | 0.9900     | C(338)–H(33b) | 0.9800     |
| C(146)–H(15d) | 0.9900     | C(338)–H(33C) | 0.9800     |
| C(147)–O(3)   | 1.424(5)   | C(338)–H(33d) | 0.9800     |
| C(147)–C(148) | 1.502(6)   | O(13)–C(349)  | 1.426(9)   |
| C(147)–H(94a) | 0.9900     | O(13)–C(339)  | 1.437(6)   |
| C(147)–H(94b) | 0.9900     | O(14)–C(341)  | 1.425(12)  |
| C(148)–O(4)   | 1.420(5)   | O(14)–C(340)  | 1.441(6)   |
| C(148)–H(14m) | 0.9900     | O(15)–C(343)  | 1.397(8)   |
| C(148)–H(14e) | 0.9900     | O(15)–C(342)  | 1.423(7)   |

**Table S22.** Continued

| bond          | length (Å) | bond          | length (Å) |
|---------------|------------|---------------|------------|
| C(149)–O(4)   | 1.429(5)   | O(17)–C(345)  | 1.403(7)   |
| C(149)–C(150) | 1.496(5)   | O(17)–C(346)  | 1.409(7)   |
| C(149)–H(15g) | 0.9900     | O(18)–C(347)  | 1.422(6)   |
| C(149)–H(15H) | 0.9900     | O(18)–C(348)  | 1.433(6)   |
| C(150)–O(5)   | 1.428(5)   | C(339)–C(340) | 1.494(8)   |
| C(150)–H(14C) | 0.9900     | C(339)–H(33L) | 0.9900     |
| C(150)–H(14d) | 0.9900     | C(339)–H(33m) | 0.9900     |
| Fe(2)–N(23)   | 1.957(3)   | C(340)–H(34a) | 0.9900     |
| Fe(2)–N(24)   | 1.970(3)   | C(340)–H(34b) | 0.9900     |
| Fe(2)–N(22)   | 1.971(3)   | C(341)–C(342) | 1.517(13)  |
| Fe(2)–C(21)   | 1.973(4)   | C(341)–H(34C) | 0.9900     |
| Fe(2)–C(22)   | 1.982(4)   | C(341)–H(34d) | 0.9900     |
| Fe(2)–N(21)   | 1.982(3)   | C(342)–H(34e) | 0.9900     |
| K(2)–O(8)     | 2.726(3)   | C(342)–H(34F) | 0.9900     |
| K(2)–O(10)    | 2.742(3)   | C(343)–C(344) | 1.516(11)  |
| K(2)–O(12b)   | 2.76(2)    | C(343)–H(34g) | 0.9900     |
| K(2)–O(7)     | 2.789(3)   | C(343)–H(34H) | 0.9900     |
| K(2)–N(26)    | 2.814(4)   | C(344)–O(16b) | 1.06(2)    |
| K(2)–O(9)     | 2.838(3)   | C(344)–O(16a) | 1.422(9)   |
| K(2)–O(11b)   | 2.912(9)   | C(2a)–O(16a)  | 1.457(11)  |
| K(2)–O(12a)   | 2.928(12)  | C(2a)–C(345)  | 1.478(11)  |
| K(2)–O(11a)   | 2.981(5)   | C(2a)–H(2a1)  | 0.9900     |
| N(21)–C(2a1)  | 1.366(4)   | C(2a)–H(2a2)  | 0.9900     |
| N(21)–C(2a2)  | 1.369(4)   | C(2b)–C(345)  | 1.512(10)  |
| N(22)–C(2a3)  | 1.368(4)   | C(2b)–O(16b)  | 1.76(3)    |
| N(22)–C(2a4)  | 1.376(4)   | C(2b)–H(2b1)  | 0.9900     |
| N(23)–C(2a6)  | 1.377(4)   | C(2b)–H(2b2)  | 0.9900     |
| N(23)–C(2a5)  | 1.378(4)   | C(346)–C(347) | 1.494(8)   |
| N(24)–C(2a7)  | 1.366(4)   | C(346)–H(34m) | 0.9900     |
| N(24)–C(2a8)  | 1.378(4)   | C(346)–H(34N) | 0.9900     |
| N(25)–C(21)   | 1.157(5)   | C(347)–H(34O) | 0.9900     |
| N(26)–C(22)   | 1.158(5)   | C(347)–H(34P) | 0.9900     |
| C(2a1)–C(2m4) | 1.403(5)   | C(348)–C(349) | 1.482(9)   |
| C(2a1)–C(2b1) | 1.444(4)   | C(348)–H(34Q) | 0.9900     |

**Table S22.** Continued

| bond          | length (Å) | bond          | length (Å) |
|---------------|------------|---------------|------------|
| C(2a2)–C(2m1) | 1.399(5)   | C(348)–H(34R) | 0.9900     |
| C(2a2)–C(2b2) | 1.448(4)   | C(349)–H(34S) | 0.9900     |
| C(2a3)–C(2m1) | 1.400(5)   | C(349)–H(34T) | 0.9900     |
| C(2a3)–C(2b3) | 1.441(5)   | O(19)–C(361)  | 1.41(3)    |
| C(2a4)–C(2m2) | 1.402(5)   | O(19)–C(350)  | 1.44(3)    |
| C(2a4)–C(2b4) | 1.442(5)   | O(20)–C(352)  | 1.40(3)    |
| C(2a5)–C(2m2) | 1.397(5)   | O(20)–C(351)  | 1.42(3)    |
| C(2a5)–C(2b5) | 1.441(5)   | O(21)–C(353)  | 1.38(3)    |
| C(2a6)–C(2m3) | 1.397(5)   | O(21)–C(354)  | 1.40(3)    |
| C(2a6)–C(2b6) | 1.445(5)   | O(22)–C(356)  | 1.37(3)    |
| C(2a7)–C(2m3) | 1.403(5)   | O(22)–C(355)  | 1.46(3)    |
| C(2a7)–C(2b7) | 1.452(5)   | O(23)–C(358)  | 1.36(2)    |
| C(2a8)–C(2m4) | 1.398(4)   | O(23)–C(357)  | 1.42(3)    |
| C(2a8)–C(2b8) | 1.437(5)   | O(24)–C(359)  | 1.39(3)    |
| C(2b1)–C(2b2) | 1.352(5)   | O(24)–C(360)  | 1.44(4)    |
| C(2b1)–H(2bd) | 0.9500     | C(350)–C(351) | 1.50(3)    |
| C(2b2)–H(2bH) | 0.9500     | C(350)–H(35d) | 0.9900     |
| C(2b3)–C(2b4) | 1.357(5)   | C(350)–H(35e) | 0.9900     |
| C(2b3)–H(2bC) | 0.9500     | C(351)–H(35F) | 0.9900     |
| C(2b4)–H(2ba) | 0.9500     | C(351)–H(35g) | 0.9900     |
| C(2b5)–C(2b6) | 1.350(5)   | C(352)–C(353) | 1.43(3)    |
| C(2b5)–H(2bb) | 0.9500     | C(352)–H(35H) | 0.9900     |
| C(2b6)–H(2be) | 0.9500     | C(352)–H(35i) | 0.9900     |
| C(2b7)–C(2b8) | 1.356(5)   | C(353)–H(35j) | 0.9900     |
| C(2b7)–H(2bF) | 0.9500     | C(353)–H(35K) | 0.9900     |
| C(2b8)–H(2bg) | 0.9500     | C(354)–C(355) | 1.47(3)    |
| C(2m1)–C(23)  | 1.500(4)   | C(354)–H(35L) | 0.9900     |
| C(2m2)–C(212) | 1.507(5)   | C(354)–H(35m) | 0.9900     |
| C(2m3)–C(221) | 1.504(5)   | C(355)–H(35N) | 0.9900     |
| C(2m4)–C(230) | 1.499(4)   | C(355)–H(35O) | 0.9900     |
| C(23)–C(24)   | 1.395(6)   | C(356)–C(357) | 1.55(3)    |
| C(23)–C(210)  | 1.417(5)   | C(356)–H(35P) | 0.9900     |
| C(24)–C(26)   | 1.395(5)   | C(356)–H(35Q) | 0.9900     |
| C(24)–C(25)   | 1.514(5)   | C(357)–H(35R) | 0.9900     |

**Table S22.** Continued

| bond          | length (Å) | bond          | length (Å) |
|---------------|------------|---------------|------------|
| C(25)–H(25a)  | 0.9800     | C(357)–H(35S) | 0.9900     |
| C(25)–H(25b)  | 0.9800     | C(358)–C(359) | 1.55(3)    |
| C(25)–H(25C)  | 0.9800     | C(358)–H(35T) | 0.9524     |
| C(26)–C(27)   | 1.384(7)   | C(358)–H(35U) | 0.9524     |
| C(26)–H(26a)  | 0.9500     | C(359)–H(35V) | 0.9900     |
| C(27)–C(29)   | 1.385(8)   | C(359)–H(35W) | 0.9900     |
| C(27)–C(28)   | 1.516(6)   | C(360)–C(361) | 1.54(4)    |
| C(28)–H(28a)  | 0.9800     | C(360)–H(36b) | 0.9900     |
| C(28)–H(28b)  | 0.9800     | C(360)–H(36C) | 0.9900     |
| C(28)–H(28C)  | 0.9800     | C(361)–H(36d) | 0.9900     |
| C(29)–C(210)  | 1.403(6)   | C(361)–H(36e) | 0.9900     |
| C(29)–H(29a)  | 0.9500     | O(26)–C(45)   | 1.4348     |
| C(210)–C(211) | 1.495(7)   | O(26)–C(48)   | 1.4391     |
| C(211)–H(21i) | 0.9800     | C(45)–C(46)   | 1.5160     |
| C(211)–H(21j) | 0.9800     | C(45)–H(42C)  | 0.9900     |
| C(211)–H(21K) | 0.9800     | C(45)–H(42d)  | 0.9900     |
| C(212)–C(219) | 1.399(5)   | C(46)–C(47)   | 1.5260     |
| C(212)–C(213) | 1.402(5)   | C(46)–H(42K)  | 0.9900     |
| C(213)–C(215) | 1.399(5)   | C(46)–H(42L)  | 0.9900     |
| C(213)–C(214) | 1.504(5)   | C(47)–C(48)   | 1.5206     |
| C(214)–H(21a) | 0.9800     | C(47)–H(42m)  | 0.9900     |
| C(214)–H(21b) | 0.9800     | C(47)–H(42N)  | 0.9900     |
| C(214)–H(21C) | 0.9800     | C(48)–H(43j)  | 0.9900     |
| C(215)–C(216) | 1.382(6)   | C(48)–H(43K)  | 0.9900     |
| C(215)–H(21d) | 0.9500     | O(27)–C(49)   | 1.418(6)   |
| C(216)–C(218) | 1.393(6)   | O(27)–C(52)   | 1.442(6)   |
| C(216)–C(217) | 1.508(5)   | C(49)–C(50)   | 1.524(7)   |
| C(217)–H(21F) | 0.9800     | C(49)–H(42a)  | 0.9900     |
| C(217)–H(21g) | 0.9800     | C(49)–H(42b)  | 0.9900     |
| C(217)–H(21H) | 0.9800     | C(50)–C(51)   | 1.513(7)   |
| C(218)–C(219) | 1.395(5)   | C(50)–H(42e)  | 0.9900     |
| C(218)–H(21e) | 0.9500     | C(50)–H(42F)  | 0.9900     |
| C(219)–C(220) | 1.517(5)   | C(51)–C(52)   | 1.524(6)   |
| C(220)–H(22a) | 0.9800     | C(51)–H(42g)  | 0.9900     |



**Table S22.** Continued

| bond          | length (Å) | bond         | length (Å) |
|---------------|------------|--------------|------------|
| C(220)–H(22b) | 0.9800     | C(51)–H(42H) | 0.9900     |
| C(220)–H(22C) | 0.9800     | C(52)–H(42i) | 0.9900     |
| C(221)–C(222) | 1.396(7)   | C(52)–H(42j) | 0.9900     |
| C(221)–C(228) | 1.411(6)   | O(28)–C(56)  | 1.494(10)  |
| C(222)–C(224) | 1.402(5)   | O(28)–C(53)  | 1.564(10)  |
| C(222)–C(223) | 1.505(6)   | C(53)–C(54)  | 1.475(10)  |
| C(223)–H(22F) | 0.9800     | C(53)–H(43m) | 0.9900     |
| C(223)–H(22g) | 0.9800     | C(53)–H(43g) | 0.9900     |
| C(223)–H(22H) | 0.9800     | C(54)–C(55)  | 1.386(11)  |
| C(224)–C(225) | 1.390(7)   | C(54)–H(43e) | 0.9900     |
| C(224)–H(22d) | 0.9500     | C(54)–H(43F) | 0.9900     |
| C(225)–C(227) | 1.376(7)   | C(55)–C(56)  | 1.369(10)  |
| C(225)–C(226) | 1.524(6)   | C(55)–H(55a) | 0.9900     |
| C(226)–H(22L) | 0.9800     | C(55)–H(55b) | 0.9900     |
| C(226)–H(22m) | 0.9800     | C(56)–H(43H) | 0.9900     |
| C(226)–H(22N) | 0.9800     | C(56)–H(43i) | 0.9900     |
| C(227)–C(228) | 1.404(5)   | O(30)–C(64)  | 1.394(7)   |
| C(227)–H(22e) | 0.9500     | O(30)–C(61)  | 1.487(8)   |
| C(228)–C(229) | 1.486(7)   | C(61)–C(62)  | 1.547(8)   |
| C(229)–H(22i) | 0.9800     | C(61)–H(61a) | 0.9900     |
| C(229)–H(22j) | 0.9800     | C(61)–H(61b) | 0.9900     |
| C(229)–H(22K) | 0.9800     | C(62)–C(63)  | 1.496(9)   |
| C(230)–C(231) | 1.400(5)   | C(62)–H(62a) | 0.9900     |
| C(230)–C(237) | 1.401(5)   | C(62)–H(62b) | 0.9900     |
| C(231)–C(233) | 1.397(5)   | C(63)–C(64)  | 1.442(8)   |
| C(231)–C(232) | 1.510(5)   | C(63)–H(63a) | 0.9900     |
| C(232)–H(23C) | 0.9800     | C(63)–H(63b) | 0.9900     |
| C(232)–H(23d) | 0.9800     | C(64)–H(64a) | 0.9900     |
| C(232)–H(23e) | 0.9800     | C(64)–H(64b) | 0.9900     |
| C(233)–C(234) | 1.390(5)   | O(25)–C(41)  | 1.442(4)   |
| C(233)–H(23b) | 0.9500     | O(25)–C(44)  | 1.443(5)   |
| C(234)–C(236) | 1.385(6)   | C(41)–C(42)  | 1.513(6)   |
| C(234)–C(235) | 1.511(5)   | C(41)–H(24m) | 0.9900     |
| C(235)–H(23i) | 0.9800     | C(41)–H(24N) | 0.9900     |

**Table S22.** Continued

| bond          | length (Å) | bond          | length (Å) |
|---------------|------------|---------------|------------|
| C(235)–H(23j) | 0.9800     | C(42)–C(43)   | 1.537(6)   |
| C(235)–H(23K) | 0.9800     | C(42)–H(24i)  | 0.9900     |
| C(236)–C(237) | 1.402(5)   | C(42)–H(24j)  | 0.9900     |
| C(236)–H(23a) | 0.9500     | C(43)–C(44)   | 1.526(6)   |
| C(237)–C(238) | 1.507(6)   | C(43)–H(24C)  | 0.9900     |
| C(238)–H(23F) | 0.9800     | C(43)–H(24d)  | 0.9900     |
| C(238)–H(23g) | 0.9800     | C(44)–H(24a)  | 0.9900     |
| C(238)–H(23H) | 0.9800     | C(44)–H(24b)  | 0.9900     |
| C(239)–O(7)   | 1.418(5)   | O(29a)–C(60a) | 1.3771     |
| C(239)–C(240) | 1.514(6)   | O(29a)–C(57a) | 1.4319     |
| C(239)–H(16C) | 0.9900     | C(57a)–C(58a) | 1.6065     |
| C(239)–H(16d) | 0.9900     | C(57a)–H(57a) | 0.9900     |
| C(240)–O(8)   | 1.419(5)   | C(57a)–H(57b) | 0.9900     |
| C(240)–H(15a) | 0.9900     | C(58a)–C(59a) | 1.5311     |
| C(240)–H(15b) | 0.9900     | C(58a)–H(58a) | 0.9900     |
| C(241)–O(8)   | 1.426(4)   | C(58a)–H(58b) | 0.9900     |
| C(241)–C(242) | 1.497(6)   | C(59a)–C(60a) | 1.6842     |
| C(241)–H(41a) | 0.9900     | C(59a)–H(59a) | 0.9900     |
| C(241)–H(41b) | 0.9900     | C(59a)–H(59b) | 0.9900     |
| C(242)–O(9)   | 1.431(5)   | C(60a)–H(60a) | 0.9900     |
| C(242)–H(24O) | 0.9900     | C(60a)–H(60b) | 0.9900     |
| C(242)–H(24P) | 0.9900     | O(29b)–C(60b) | 1.4345     |
| C(243)–O(9)   | 1.415(5)   | O(29b)–C(57b) | 1.4419     |
| C(243)–C(244) | 1.492(6)   | C(57b)–C(58b) | 1.5151     |
| C(243)–H(24Q) | 0.9900     | C(57b)–H(57C) | 0.9900     |
| C(243)–H(24R) | 0.9900     | C(57b)–H(57d) | 0.9900     |
| C(244)–O(10)  | 1.397(5)   | C(58b)–C(59b) | 1.5310     |
| C(244)–H(18F) | 0.9900     | C(58b)–H(58C) | 0.9900     |
| C(244)–H(18g) | 0.9900     | C(58b)–H(58d) | 0.9900     |
| C(245)–C(26b) | 1.407(19)  | C(59b)–C(60b) | 1.5176     |
| C(245)–O(10)  | 1.408(5)   | C(59b)–H(59C) | 0.9900     |
| C(245)–C(26a) | 1.507(10)  | C(59b)–H(59d) | 0.9900     |
| C(245)–H(18i) | 0.9900     | C(60b)–H(60C) | 0.9900     |
| C(245)–H(18j) | 0.9900     | C(60b)–H(60d) | 0.9900     |

**Table S22.** Continued

| bond          | length (Å) | bond         | length (Å) |
|---------------|------------|--------------|------------|
| C(248)–O(12b) | 1.36(3)    | O(31)–H(311) | 0.671(4)   |
| C(248)–O(12a) | 1.447(13)  | O(31)–H(312) | 0.663(5)   |
| C(248)–C(249) | 1.487(6)   |              |            |
| C(248)–H(24K) | 0.9411     |              |            |

<sup>a</sup>The estimated standard deviations of the least significant digits are given in parentheses.

**Table S23.** Bond Angles for 3[K(18-crown-6)][Fe(TMP)(CN)<sub>2</sub>].5.1(THF).0.9H<sub>2</sub>O<sup>a</sup>

| angle             | degree     | angle                | degree    |
|-------------------|------------|----------------------|-----------|
| C(11)–Fe(1)–N(13) | 91.76(13)  | O(11a)–C(26a)–H(26b) | 109.9     |
| C(11)–Fe(1)–N(14) | 87.92(13)  | C(245)–C(26a)–H(26b) | 109.9     |
| N(13)–Fe(1)–N(14) | 89.44(11)  | O(11a)–C(26a)–H(26C) | 109.9     |
| C(11)–Fe(1)–N(11) | 89.33(13)  | C(245)–C(26a)–H(26C) | 109.9     |
| N(13)–Fe(1)–N(11) | 178.91(13) | H(26b)–C(26a)–H(26C) | 108.3     |
| N(14)–Fe(1)–N(11) | 90.48(11)  | C(26a)–O(11a)–C(27a) | 113.9(6)  |
| C(11)–Fe(1)–N(12) | 90.23(13)  | C(26a)–O(11a)–K(2)   | 110.2(4)  |
| N(13)–Fe(1)–N(12) | 89.72(11)  | C(27a)–O(11a)–K(2)   | 111.0(5)  |
| N(14)–Fe(1)–N(12) | 177.95(12) | C(1a)–O(12a)–C(248)  | 113.1(9)  |
| N(11)–Fe(1)–N(12) | 90.39(11)  | C(1a)–O(12a)–K(2)    | 114.4(6)  |
| C(11)–Fe(1)–C(12) | 173.06(13) | C(248)–O(12a)–K(2)   | 111.5(5)  |
| N(13)–Fe(1)–C(12) | 95.13(13)  | C(27b)–C(1b)–O(12b)  | 108.1(17) |
| N(14)–Fe(1)–C(12) | 91.32(13)  | C(27b)–C(1b)–H(1b1)  | 110.1     |
| N(11)–Fe(1)–C(12) | 83.78(12)  | O(12b)–C(1b)–H(1b1)  | 110.1     |
| N(12)–Fe(1)–C(12) | 90.62(13)  | C(27b)–C(1b)–H(1b2)  | 110.1     |
| O(4)–K(1)–O(1)    | 167.55(10) | O(12b)–C(1b)–H(1b2)  | 110.1     |
| O(4)–K(1)–O(2)    | 115.89(8)  | H(1b1)–C(1b)–H(1b2)  | 108.4     |
| O(1)–K(1)–O(2)    | 60.57(8)   | O(11b)–C(27b)–C(1b)  | 106.9(18) |
| O(4)–K(1)–O(6)    | 113.70(8)  | O(11b)–C(27b)–H(27C) | 110.3     |
| O(1)–K(1)–O(6)    | 62.48(7)   | C(1b)–C(27b)–H(27C)  | 110.3     |
| O(2)–K(1)–O(6)    | 116.96(8)  | O(11b)–C(27b)–H(27d) | 110.3     |
| O(4)–K(1)–N(16)   | 98.36(9)   | C(1b)–C(27b)–H(27d)  | 110.3     |
| O(1)–K(1)–N(16)   | 92.10(9)   | H(27C)–C(27b)–H(27d) | 108.6     |
| O(2)–K(1)–N(16)   | 130.07(9)  | C(245)–C(26b)–O(11b) | 122.9(14) |
| O(6)–K(1)–N(16)   | 75.35(9)   | C(245)–C(26b)–H(26d) | 106.6     |
| O(4)–K(1)–O(3)    | 57.87(8)   | O(11b)–C(26b)–H(26d) | 106.6     |
| O(1)–K(1)–O(3)    | 120.05(8)  | C(245)–C(26b)–H(26e) | 106.6     |
| O(2)–K(1)–O(3)    | 59.48(7)   | O(11b)–C(26b)–H(26e) | 106.6     |
| O(6)–K(1)–O(3)    | 155.20(8)  | H(26d)–C(26b)–H(26e) | 106.6     |
| N(16)–K(1)–O(3)   | 127.11(9)  | C(27b)–O(11b)–C(26b) | 111.6(13) |
| O(4)–K(1)–O(5)    | 54.74(8)   | C(27b)–O(11b)–K(2)   | 107.2(11) |
| O(1)–K(1)–O(5)    | 119.84(8)  | C(26b)–O(11b)–K(2)   | 107.6(9)  |
| O(2)–K(1)–O(5)    | 143.23(8)  | C(248)–O(12b)–C(1b)  | 103.5(17) |
| O(6)–K(1)–O(5)    | 58.97(7)   | C(248)–O(12b)–K(2)   | 124.8(12) |

**Table S23.** Continued

| angle                | degree    | angle             | degree     |
|----------------------|-----------|-------------------|------------|
| N(16)–K(1)–O(5)      | 85.99(8)  | C(1b)–O(12b)–K(2) | 118.1(12)  |
| O(3)–K(1)–O(5)       | 107.70(8) | N(34)–Fe(3)–N(33) | 90.18(11)  |
| C(1a1)–N(11)–C(1a2)  | 106.7(3)  | N(34)–Fe(3)–C(31) | 93.03(14)  |
| C(1a1)–N(11)–Fe(1)   | 126.2(2)  | N(33)–Fe(3)–C(31) | 94.20(13)  |
| C(1a2)–N(11)–Fe(1)   | 126.6(2)  | N(34)–Fe(3)–N(32) | 178.72(13) |
| C(1a4)–N(12)–C(1a3)  | 106.1(3)  | N(33)–Fe(3)–N(32) | 89.08(11)  |
| C(1a4)–N(12)–Fe(1)   | 127.6(2)  | C(31)–Fe(3)–N(32) | 85.99(13)  |
| C(1a3)–N(12)–Fe(1)   | 126.2(2)  | N(34)–Fe(3)–N(31) | 89.62(12)  |
| C(1a5)–N(13)–C(1a6)  | 106.3(3)  | N(33)–Fe(3)–N(31) | 178.61(13) |
| C(1a5)–N(13)–Fe(1)   | 126.9(2)  | C(31)–Fe(3)–N(31) | 87.18(13)  |
| C(1a6)–N(13)–Fe(1)   | 126.8(2)  | N(32)–Fe(3)–N(31) | 91.15(12)  |
| C(1a7)–N(14)–C(1a8)  | 106.2(3)  | N(34)–Fe(3)–C(32) | 90.89(13)  |
| C(1a7)–N(14)–Fe(1)   | 127.1(2)  | N(33)–Fe(3)–C(32) | 92.13(13)  |
| C(1a8)–N(14)–Fe(1)   | 126.5(2)  | C(31)–Fe(3)–C(32) | 172.54(14) |
| C(12)–N(16)–K(1)     | 172.2(3)  | N(32)–Fe(3)–C(32) | 90.17(13)  |
| N(11)–C(1a1)–C(1m4)  | 125.2(3)  | N(31)–Fe(3)–C(32) | 86.50(13)  |
| N(11)–C(1a1)–C(1b1)  | 109.7(3)  | O(23)–K(3)–O(24)  | 66.6(5)    |
| C(1m4)–C(1a1)–C(1b1) | 124.8(3)  | O(23)–K(3)–O(15)  | 134.0(4)   |
| N(11)–C(1a2)–C(1m1)  | 125.8(3)  | O(24)–K(3)–O(15)  | 138.0(4)   |
| N(11)–C(1a2)–C(1b2)  | 109.6(3)  | O(23)–K(3)–O(22)  | 63.5(5)    |
| C(1m1)–C(1a2)–C(1b2) | 124.5(3)  | O(24)–K(3)–O(22)  | 110.0(5)   |
| N(12)–C(1a3)–C(1m1)  | 125.6(3)  | O(15)–K(3)–O(22)  | 70.7(3)    |
| N(12)–C(1a3)–C(1b3)  | 110.0(3)  | O(23)–K(3)–O(13)  | 96.7(4)    |
| C(1m1)–C(1a3)–C(1b3) | 124.0(3)  | O(24)–K(3)–O(13)  | 30.4(3)    |
| N(12)–C(1a4)–C(1m2)  | 125.3(3)  | O(15)–K(3)–O(13)  | 117.33(13) |
| N(12)–C(1a4)–C(1b4)  | 110.2(3)  | O(22)–K(3)–O(13)  | 131.5(4)   |
| C(1m2)–C(1a4)–C(1b4) | 124.4(3)  | O(23)–K(3)–N(36)  | 105.0(4)   |
| N(13)–C(1a5)–C(1m2)  | 126.1(3)  | O(24)–K(3)–N(36)  | 97.3(4)    |
| N(13)–C(1a5)–C(1b5)  | 109.6(3)  | O(15)–K(3)–N(36)  | 107.34(13) |
| C(1m2)–C(1a5)–C(1b5) | 123.5(3)  | O(22)–K(3)–N(36)  | 140.4(4)   |
| N(13)–C(1a6)–C(1m3)  | 126.4(3)  | O(13)–K(3)–N(36)  | 85.71(10)  |
| N(13)–C(1a6)–C(1b6)  | 109.6(3)  | O(23)–K(3)–O(18)  | 41.5(4)    |
| C(1m3)–C(1a6)–C(1b6) | 123.9(3)  | O(24)–K(3)–O(18)  | 30.0(3)    |
| N(14)–C(1a7)–C(1m3)  | 125.6(3)  | O(15)–K(3)–O(18)  | 135.70(14) |

**Table S23.** Continued

| angle                | degree   | angle            | degree     |
|----------------------|----------|------------------|------------|
| N(14)–C(1a7)–C(1b7)  | 110.2(3) | O(22)–K(3)–O(18) | 81.5(4)    |
| C(1m3)–C(1a7)–C(1b7) | 124.1(3) | O(13)–K(3)–O(18) | 59.42(10)  |
| N(14)–C(1a8)–C(1m4)  | 125.8(3) | N(36)–K(3)–O(18) | 115.92(10) |
| N(14)–C(1a8)–C(1b8)  | 109.9(3) | O(23)–K(3)–O(14) | 155.2(4)   |
| C(1m4)–C(1a8)–C(1b8) | 124.1(3) | O(24)–K(3)–O(14) | 89.8(3)    |
| C(1b2)–C(1b1)–C(1a1) | 107.1(3) | O(15)–K(3)–O(14) | 60.24(12)  |
| C(1b2)–C(1b1)–H(1ba) | 126.5    | O(22)–K(3)–O(14) | 122.5(3)   |
| C(1a1)–C(1b1)–H(1ba) | 126.5    | O(13)–K(3)–O(14) | 60.61(10)  |
| C(1b1)–C(1b2)–C(1a2) | 106.9(3) | N(36)–K(3)–O(14) | 84.54(11)  |
| C(1b1)–C(1b2)–H(1bF) | 126.6    | O(18)–K(3)–O(14) | 113.68(11) |
| C(1a2)–C(1b2)–H(1bF) | 126.6    | O(23)–K(3)–O(19) | 127.2(5)   |
| C(1b4)–C(1b3)–C(1a3) | 107.4(3) | O(24)–K(3)–O(19) | 62.2(4)    |
| C(1b4)–C(1b3)–H(1be) | 126.3    | O(15)–K(3)–O(19) | 82.3(3)    |
| C(1a3)–C(1b3)–H(1be) | 126.3    | O(22)–K(3)–O(19) | 124.1(5)   |
| C(1b3)–C(1b4)–C(1a4) | 106.3(3) | O(13)–K(3)–O(19) | 35.1(3)    |
| C(1b3)–C(1b4)–H(1bd) | 126.8    | N(36)–K(3)–O(19) | 93.7(3)    |
| C(1a4)–C(1b4)–H(1bd) | 126.8    | O(18)–K(3)–O(19) | 85.8(3)    |
| C(1b6)–C(1b5)–C(1a5) | 107.3(3) | O(14)–K(3)–O(19) | 28.1(3)    |
| C(1b6)–C(1b5)–H(1bg) | 126.3    | O(23)–K(3)–O(17) | 22.5(4)    |
| C(1a5)–C(1b5)–H(1bg) | 126.3    | O(24)–K(3)–O(17) | 88.2(3)    |
| C(1b5)–C(1b6)–C(1a6) | 107.1(3) | O(15)–K(3)–O(17) | 113.63(14) |
| C(1b5)–C(1b6)–H(1bH) | 126.5    | O(22)–K(3)–O(17) | 46.0(3)    |
| C(1a6)–C(1b6)–H(1bH) | 126.5    | O(13)–K(3)–O(17) | 118.63(11) |
| C(1b8)–C(1b7)–C(1a7) | 106.8(3) | N(36)–K(3)–O(17) | 109.51(11) |
| C(1b8)–C(1b7)–H(1bC) | 126.6    | O(18)–K(3)–O(17) | 60.63(11)  |
| C(1a7)–C(1b7)–H(1bC) | 126.6    | O(14)–K(3)–O(17) | 165.95(12) |
| C(1b7)–C(1b8)–C(1a8) | 106.9(3) | O(19)–K(3)–O(17) | 144.9(3)   |
| C(1b7)–C(1b8)–H(1bb) | 126.6    | O(23)–K(3)–O(20) | 174.0(7)   |
| C(1a8)–C(1b8)–H(1bb) | 126.6    | O(24)–K(3)–O(20) | 119.3(6)   |
| C(1a3)–C(1m1)–C(1a2) | 123.1(3) | O(15)–K(3)–O(20) | 42.6(7)    |
| C(1a3)–C(1m1)–C(13)  | 119.3(3) | O(22)–K(3)–O(20) | 113.3(7)   |
| C(1a2)–C(1m1)–C(13)  | 117.6(3) | O(13)–K(3)–O(20) | 89.1(6)    |
| C(1a5)–C(1m2)–C(1a4) | 122.4(3) | N(36)–K(3)–O(20) | 74.1(7)    |
| C(1a5)–C(1m2)–C(112) | 118.5(3) | O(18)–K(3)–O(20) | 144.3(6)   |

**Table S23.** Continued

| angle                | degree   | angle                | degree     |
|----------------------|----------|----------------------|------------|
| C(1a4)–C(1m2)–C(112) | 118.8(3) | O(14)–K(3)–O(20)     | 30.7(6)    |
| C(1a6)–C(1m3)–C(1a7) | 121.6(3) | O(19)–K(3)–O(20)     | 58.7(6)    |
| C(1a6)–C(1m3)–C(121) | 118.1(3) | O(17)–K(3)–O(20)     | 152.0(6)   |
| C(1a7)–C(1m3)–C(121) | 120.3(3) | O(23)–K(3)–O(16a)    | 78.4(4)    |
| C(1a8)–C(1m4)–C(1a1) | 123.2(3) | O(24)–K(3)–O(16a)    | 132.5(4)   |
| C(1a8)–C(1m4)–C(130) | 118.3(3) | O(15)–K(3)–O(16a)    | 56.74(13)  |
| C(1a1)–C(1m4)–C(130) | 118.4(3) | O(22)–K(3)–O(16a)    | 22.6(4)    |
| N(15)–C(11)–Fe(1)    | 176.4(3) | O(13)–K(3)–O(16a)    | 151.34(13) |
| N(16)–C(12)–Fe(1)    | 172.2(3) | N(36)–K(3)–O(16a)    | 122.91(12) |
| C(14)–C(13)–C(110)   | 120.4(3) | O(18)–K(3)–O(16a)    | 103.54(12) |
| C(14)–C(13)–C(1m1)   | 121.2(3) | O(14)–K(3)–O(16a)    | 116.06(11) |
| C(110)–C(13)–C(1m1)  | 118.5(3) | O(19)–K(3)–O(16a)    | 130.2(3)   |
| C(13)–C(14)–C(16)    | 119.0(4) | O(17)–K(3)–O(16a)    | 56.95(12)  |
| C(13)–C(14)–C(15)    | 121.8(3) | O(20)–K(3)–O(16a)    | 97.1(6)    |
| C(16)–C(14)–C(15)    | 119.1(4) | C(3a1)–N(31)–C(3a2)  | 106.9(3)   |
| C(14)–C(15)–H(15i)   | 109.5    | C(3a1)–N(31)–Fe(3)   | 127.3(2)   |
| C(14)–C(15)–H(15j)   | 109.5    | C(3a2)–N(31)–Fe(3)   | 125.8(2)   |
| H(15i)–C(15)–H(15j)  | 109.5    | C(3a3)–N(32)–C(3a4)  | 106.7(3)   |
| C(14)–C(15)–H(15K)   | 109.5    | C(3a3)–N(32)–Fe(3)   | 126.1(2)   |
| H(15i)–C(15)–H(15K)  | 109.5    | C(3a4)–N(32)–Fe(3)   | 127.0(2)   |
| H(15j)–C(15)–H(15K)  | 109.5    | C(3a5)–N(33)–C(3a6)  | 106.4(3)   |
| C(17)–C(16)–C(14)    | 121.7(4) | C(3a5)–N(33)–Fe(3)   | 127.8(2)   |
| C(17)–C(16)–H(16a)   | 119.1    | C(3a6)–N(33)–Fe(3)   | 125.8(2)   |
| C(14)–C(16)–H(16a)   | 119.1    | C(3a7)–N(34)–C(3a8)  | 106.4(3)   |
| C(16)–C(17)–C(19)    | 118.4(3) | C(3a7)–N(34)–Fe(3)   | 126.6(2)   |
| C(16)–C(17)–C(18)    | 120.7(4) | C(3a8)–N(34)–Fe(3)   | 126.9(2)   |
| C(19)–C(17)–C(18)    | 120.9(4) | C(32)–N(36)–K(3)     | 164.0(3)   |
| C(17)–C(18)–H(18a)   | 109.5    | N(31)–C(3a1)–C(3m4)  | 125.6(3)   |
| C(17)–C(18)–H(18b)   | 109.5    | N(31)–C(3a1)–C(3b1)  | 109.6(3)   |
| H(18a)–C(18)–H(18b)  | 109.5    | C(3m4)–C(3a1)–C(3b1) | 124.6(3)   |
| C(17)–C(18)–H(18C)   | 109.5    | N(31)–C(3a2)–C(3m1)  | 125.3(3)   |
| H(18a)–C(18)–H(18C)  | 109.5    | N(31)–C(3a2)–C(3b2)  | 109.3(3)   |
| H(18b)–C(18)–H(18C)  | 109.5    | C(3m1)–C(3a2)–C(3b2) | 125.1(3)   |
| C(17)–C(19)–C(110)   | 122.1(4) | N(32)–C(3a3)–C(3m1)  | 126.0(3)   |

**Table S23.** Continued

| angle                | degree   | angle                | degree   |
|----------------------|----------|----------------------|----------|
| C(17)–C(19)–H(19a)   | 119.0    | N(32)–C(3a3)–C(3b3)  | 109.5(3) |
| C(110)–C(19)–H(19a)  | 119.0    | C(3m1)–C(3a3)–C(3b3) | 124.3(3) |
| C(19)–C(110)–C(13)   | 118.4(4) | N(32)–C(3a4)–C(3m2)  | 125.5(3) |
| C(19)–C(110)–C(111)  | 120.9(3) | N(32)–C(3a4)–C(3b4)  | 109.7(3) |
| C(13)–C(110)–C(111)  | 120.7(3) | C(3m2)–C(3a4)–C(3b4) | 124.6(3) |
| C(110)–C(111)–H(11C) | 109.5    | N(33)–C(3a5)–C(3m2)  | 125.1(3) |
| C(110)–C(111)–H(11d) | 109.5    | N(33)–C(3a5)–C(3b5)  | 109.7(3) |
| H(11C)–C(111)–H(11d) | 109.5    | C(3m2)–C(3a5)–C(3b5) | 124.7(3) |
| C(110)–C(111)–H(11e) | 109.5    | N(33)–C(3a6)–C(3m3)  | 125.6(3) |
| H(11C)–C(111)–H(11e) | 109.5    | N(33)–C(3a6)–C(3b6)  | 109.4(3) |
| H(11d)–C(111)–H(11e) | 109.5    | C(3m3)–C(3a6)–C(3b6) | 124.3(3) |
| C(113)–C(112)–C(119) | 120.0(3) | N(34)–C(3a7)–C(3m3)  | 125.8(3) |
| C(113)–C(112)–C(1m2) | 119.5(3) | N(34)–C(3a7)–C(3b7)  | 109.9(3) |
| C(119)–C(112)–C(1m2) | 120.4(3) | C(3m3)–C(3a7)–C(3b7) | 124.2(3) |
| C(112)–C(113)–C(115) | 118.9(3) | N(34)–C(3a8)–C(3m4)  | 125.9(3) |
| C(112)–C(113)–C(114) | 121.3(3) | N(34)–C(3a8)–C(3b8)  | 109.5(3) |
| C(115)–C(113)–C(114) | 119.8(3) | C(3m4)–C(3a8)–C(3b8) | 123.9(3) |
| C(113)–C(114)–H(11F) | 109.5    | C(3b2)–C(3b1)–C(3a1) | 107.1(3) |
| C(113)–C(114)–H(11g) | 109.5    | C(3b2)–C(3b1)–H(3bH) | 126.4    |
| H(11f)–C(114)–H(11g) | 109.5    | C(3a1)–C(3b1)–H(3bH) | 126.4    |
| C(113)–C(114)–H(11H) | 109.5    | C(3b1)–C(3b2)–C(3a2) | 107.0(3) |
| H(11f)–C(114)–H(11H) | 109.5    | C(3b1)–C(3b2)–H(3bg) | 126.5    |
| H(11g)–C(114)–H(11H) | 109.5    | C(3a2)–C(3b2)–H(3bg) | 126.5    |
| C(116)–C(115)–C(113) | 121.5(4) | C(3b4)–C(3b3)–C(3a3) | 107.3(3) |
| C(116)–C(115)–H(11a) | 119.3    | C(3b4)–C(3b3)–H(3bC) | 126.4    |
| C(113)–C(115)–H(11a) | 119.3    | C(3a3)–C(3b3)–H(3bC) | 126.4    |
| C(118)–C(116)–C(115) | 118.5(3) | C(3b3)–C(3b4)–C(3a4) | 106.7(3) |
| C(118)–C(116)–C(117) | 120.8(4) | C(3b3)–C(3b4)–H(3ba) | 126.7    |
| C(115)–C(116)–C(117) | 120.7(4) | C(3a4)–C(3b4)–H(3ba) | 126.7    |
| C(116)–C(117)–H(11i) | 109.5    | C(3b6)–C(3b5)–C(3a5) | 107.5(3) |
| C(116)–C(117)–H(11j) | 109.5    | C(3b6)–C(3b5)–H(3bd) | 126.2    |
| H(11i)–C(117)–H(11j) | 109.5    | C(3a5)–C(3b5)–H(3bd) | 126.2    |
| C(116)–C(117)–H(11K) | 109.5    | C(3b5)–C(3b6)–C(3a6) | 106.9(3) |
| H(11i)–C(117)–H(11K) | 109.5    | C(3b5)–C(3b6)–H(3bF) | 126.6    |



**Table S23.** Continued

| angle                | degree   | angle                | degree   |
|----------------------|----------|----------------------|----------|
| H(11j)–C(117)–H(11K) | 109.5    | C(3a6)–C(3b6)–H(3bF) | 126.6    |
| C(116)–C(118)–C(119) | 121.8(3) | C(3b8)–C(3b7)–C(3a7) | 107.1(3) |
| C(116)–C(118)–H(11b) | 119.1    | C(3b8)–C(3b7)–H(3bb) | 126.4    |
| C(119)–C(118)–H(11b) | 119.1    | C(3a7)–C(3b7)–H(3bb) | 126.4    |
| C(118)–C(119)–C(112) | 119.2(3) | C(3b7)–C(3b8)–C(3a8) | 106.9(3) |
| C(118)–C(119)–C(120) | 120.3(3) | C(3b7)–C(3b8)–H(3be) | 126.6    |
| C(112)–C(119)–C(120) | 120.4(3) | C(3a8)–C(3b8)–H(3be) | 126.6    |
| C(119)–C(120)–H(12C) | 109.5    | C(3a3)–C(3m1)–C(3a2) | 123.7(3) |
| C(119)–C(120)–H(12d) | 109.5    | C(3a3)–C(3m1)–C(33)  | 118.5(3) |
| H(12C)–C(120)–H(12d) | 109.5    | C(3a2)–C(3m1)–C(33)  | 117.6(3) |
| C(119)–C(120)–H(12e) | 109.5    | C(3a5)–C(3m2)–C(3a4) | 122.0(3) |
| H(12C)–C(120)–H(12e) | 109.5    | C(3a5)–C(3m2)–C(312) | 120.5(3) |
| H(12d)–C(120)–H(12e) | 109.5    | C(3a4)–C(3m2)–C(312) | 117.4(3) |
| C(128)–C(121)–C(122) | 119.3(3) | C(3a6)–C(3m3)–C(3a7) | 121.8(3) |
| C(128)–C(121)–C(1m3) | 117.8(3) | C(3a6)–C(3m3)–C(321) | 120.8(3) |
| C(122)–C(121)–C(1m3) | 122.9(3) | C(3a7)–C(3m3)–C(321) | 117.4(3) |
| C(124)–C(122)–C(121) | 119.0(3) | C(3a8)–C(3m4)–C(3a1) | 122.1(3) |
| C(124)–C(122)–C(123) | 119.8(3) | C(3a8)–C(3m4)–C(330) | 118.9(3) |
| C(121)–C(122)–C(123) | 121.1(3) | C(3a1)–C(3m4)–C(330) | 118.8(3) |
| C(122)–C(123)–H(12i) | 109.5    | N(35)–C(31)–Fe(3)    | 175.6(3) |
| C(122)–C(123)–H(12j) | 109.5    | N(36)–C(32)–Fe(3)    | 174.4(3) |
| H(12i)–C(123)–H(12j) | 109.5    | C(34)–C(33)–C(310)   | 120.5(3) |
| C(122)–C(123)–H(12K) | 109.5    | C(34)–C(33)–C(3m1)   | 119.7(3) |
| H(12i)–C(123)–H(12K) | 109.5    | C(310)–C(33)–C(3m1)  | 119.8(3) |
| H(12j)–C(123)–H(12K) | 109.5    | C(33)–C(34)–C(36)    | 119.0(4) |
| C(125)–C(124)–C(122) | 122.3(3) | C(33)–C(34)–C(35)    | 121.3(3) |
| C(125)–C(124)–H(12b) | 118.8    | C(36)–C(34)–C(35)    | 119.7(4) |
| C(122)–C(124)–H(12b) | 118.8    | C(34)–C(35)–H(35a)   | 109.5    |
| C(124)–C(125)–C(127) | 118.0(3) | C(34)–C(35)–H(35b)   | 109.5    |
| C(124)–C(125)–C(126) | 121.6(4) | H(35a)–C(35)–H(35b)  | 109.5    |
| C(127)–C(125)–C(126) | 120.4(4) | C(34)–C(35)–H(35C)   | 109.5    |
| C(125)–C(126)–H(12L) | 109.5    | H(35a)–C(35)–H(35C)  | 109.5    |
| C(125)–C(126)–H(12m) | 109.5    | H(35b)–C(35)–H(35C)  | 109.5    |
| H(12L)–C(126)–H(12m) | 109.5    | C(34)–C(36)–C(37)    | 121.0(4) |

**Table S23.** Continued

| angle                | degree   | angle                | degree   |
|----------------------|----------|----------------------|----------|
| C(125)–C(126)–H(12N) | 109.5    | C(34)–C(36)–H(36a)   | 119.5    |
| H(12L)–C(126)–H(12N) | 109.5    | C(37)–C(36)–H(36a)   | 119.5    |
| H(12m)–C(126)–H(12N) | 109.5    | C(39)–C(37)–C(36)    | 118.7(4) |
| C(125)–C(127)–C(128) | 122.1(4) | C(39)–C(37)–C(38)    | 120.7(5) |
| C(125)–C(127)–H(12a) | 118.9    | C(36)–C(37)–C(38)    | 120.6(5) |
| C(128)–C(127)–H(12a) | 118.9    | C(37)–C(38)–H(38a)   | 109.5    |
| C(127)–C(128)–C(121) | 119.3(3) | C(37)–C(38)–H(38b)   | 109.5    |
| C(127)–C(128)–C(129) | 119.9(3) | H(38a)–C(38)–H(38b)  | 109.5    |
| C(121)–C(128)–C(129) | 120.8(3) | C(37)–C(38)–H(38C)   | 109.5    |
| C(128)–C(129)–H(12F) | 109.5    | H(38a)–C(38)–H(38C)  | 109.5    |
| C(128)–C(129)–H(12g) | 109.5    | H(38b)–C(38)–H(38C)  | 109.5    |
| H(12f)–C(129)–H(12g) | 109.5    | C(37)–C(39)–C(310)   | 122.5(4) |
| C(128)–C(129)–H(12H) | 109.5    | C(37)–C(39)–H(39a)   | 118.8    |
| H(12f)–C(129)–H(12H) | 109.5    | C(310)–C(39)–H(39a)  | 118.8    |
| H(12g)–C(129)–H(12H) | 109.5    | C(39)–C(310)–C(33)   | 118.2(4) |
| C(131)–C(130)–C(137) | 120.3(3) | C(39)–C(310)–C(311)  | 121.0(4) |
| C(131)–C(130)–C(1m4) | 119.2(3) | C(33)–C(310)–C(311)  | 120.8(4) |
| C(137)–C(130)–C(1m4) | 120.5(3) | C(310)–C(311)–H(31i) | 109.5    |
| C(130)–C(131)–C(133) | 119.4(3) | C(310)–C(311)–H(31j) | 109.5    |
| C(130)–C(131)–C(132) | 120.9(3) | H(31i)–C(311)–H(31j) | 109.5    |
| C(133)–C(131)–C(132) | 119.7(3) | C(310)–C(311)–H(31K) | 109.5    |
| C(131)–C(132)–H(13F) | 109.5    | H(31i)–C(311)–H(31K) | 109.5    |
| C(131)–C(132)–H(13g) | 109.5    | H(31j)–C(311)–H(31K) | 109.5    |
| H(13f)–C(132)–H(13g) | 109.5    | C(319)–C(312)–C(313) | 119.4(3) |
| C(131)–C(132)–H(13H) | 109.5    | C(319)–C(312)–C(3m2) | 118.6(3) |
| H(13f)–C(132)–H(13H) | 109.5    | C(313)–C(312)–C(3m2) | 121.9(3) |
| H(13g)–C(132)–H(13H) | 109.5    | C(315)–C(313)–C(312) | 119.5(3) |
| C(134)–C(133)–C(131) | 121.1(3) | C(315)–C(313)–C(314) | 118.1(3) |
| C(134)–C(133)–H(13a) | 119.5    | C(312)–C(313)–C(314) | 122.4(3) |
| C(131)–C(133)–H(13a) | 119.5    | C(313)–C(314)–H(31F) | 109.5    |
| C(133)–C(134)–C(136) | 118.6(3) | C(313)–C(314)–H(31g) | 109.5    |
| C(133)–C(134)–C(135) | 120.7(4) | H(31f)–C(314)–H(31g) | 109.5    |
| C(136)–C(134)–C(135) | 120.7(3) | C(313)–C(314)–H(31H) | 109.5    |
| C(134)–C(135)–H(13C) | 109.5    | H(31f)–C(314)–H(31H) | 109.5    |

**Table S23.** Continued

| angle                | degree   | angle                | degree   |
|----------------------|----------|----------------------|----------|
| C(134)–C(135)–H(13d) | 109.5    | H(31g)–C(314)–H(31H) | 109.5    |
| H(13C)–C(135)–H(13d) | 109.5    | C(316)–C(315)–C(313) | 122.0(3) |
| C(134)–C(135)–H(13e) | 109.5    | C(316)–C(315)–H(31a) | 119.0    |
| H(13C)–C(135)–H(13e) | 109.5    | C(313)–C(315)–H(31a) | 119.0    |
| H(13d)–C(135)–H(13e) | 109.5    | C(315)–C(316)–C(318) | 117.9(3) |
| C(137)–C(136)–C(134) | 122.1(3) | C(315)–C(316)–C(317) | 120.9(3) |
| C(137)–C(136)–H(13b) | 119.0    | C(318)–C(316)–C(317) | 121.2(4) |
| C(134)–C(136)–H(13b) | 119.0    | C(316)–C(317)–H(31C) | 109.5    |
| C(136)–C(137)–C(130) | 118.5(3) | C(316)–C(317)–H(31d) | 109.5    |
| C(136)–C(137)–C(138) | 119.9(3) | H(31C)–C(317)–H(31d) | 109.5    |
| C(130)–C(137)–C(138) | 121.6(3) | C(316)–C(317)–H(31e) | 109.5    |
| C(137)–C(138)–H(13i) | 109.5    | H(31C)–C(317)–H(31e) | 109.5    |
| C(137)–C(138)–H(13j) | 109.5    | H(31d)–C(317)–H(31e) | 109.5    |
| H(13i)–C(138)–H(13j) | 109.5    | C(319)–C(318)–C(316) | 122.0(4) |
| C(137)–C(138)–H(13K) | 109.5    | C(319)–C(318)–H(31b) | 119.0    |
| H(13i)–C(138)–H(13K) | 109.5    | C(316)–C(318)–H(31b) | 119.0    |
| H(13j)–C(138)–H(13K) | 109.5    | C(318)–C(319)–C(312) | 119.2(3) |
| O(5)–C(139)–C(140)   | 114.4(3) | C(318)–C(319)–C(320) | 119.8(4) |
| O(5)–C(139)–H(13L)   | 108.7    | C(312)–C(319)–C(320) | 121.0(3) |
| C(140)–C(139)–H(13L) | 108.7    | C(319)–C(320)–H(32L) | 109.5    |
| O(5)–C(139)–H(13m)   | 108.7    | C(319)–C(320)–H(32m) | 109.5    |
| C(140)–C(139)–H(13m) | 108.7    | H(32L)–C(320)–H(32m) | 109.5    |
| H(13L)–C(139)–H(13m) | 107.6    | C(319)–C(320)–H(32N) | 109.5    |
| O(6)–C(140)–C(139)   | 108.0(3) | H(32L)–C(320)–H(32N) | 109.5    |
| O(6)–C(140)–H(14a)   | 110.1    | H(32m)–C(320)–H(32N) | 109.5    |
| C(139)–C(140)–H(14a) | 110.1    | C(322)–C(321)–C(328) | 120.4(3) |
| O(6)–C(140)–H(14b)   | 110.1    | C(322)–C(321)–C(3m3) | 117.4(3) |
| C(139)–C(140)–H(14b) | 110.1    | C(328)–C(321)–C(3m3) | 122.1(3) |
| H(14a)–C(140)–H(14b) | 108.4    | C(324)–C(322)–C(321) | 119.2(3) |
| O(6)–C(141)–C(142)   | 108.3(3) | C(324)–C(322)–C(323) | 119.2(4) |
| O(6)–C(141)–H(43C)   | 110.0    | C(321)–C(322)–C(323) | 121.6(3) |
| C(142)–C(141)–H(43C) | 110.0    | C(322)–C(323)–H(32e) | 109.5    |
| O(6)–C(141)–H(43d)   | 110.0    | C(322)–C(323)–H(32F) | 109.5    |
| C(142)–C(141)–H(43d) | 110.0    | H(32e)–C(323)–H(32f) | 109.5    |

**Table S23.** Continued

| angle                | degree   | angle                | degree   |
|----------------------|----------|----------------------|----------|
| H(43C)–C(141)–H(43d) | 108.4    | C(322)–C(323)–H(32g) | 109.5    |
| O(1)–C(142)–C(141)   | 108.2(3) | H(32e)–C(323)–H(32g) | 109.5    |
| O(1)–C(142)–H(70a)   | 110.1    | H(32f)–C(323)–H(32g) | 109.5    |
| C(141)–C(142)–H(70a) | 110.1    | C(325)–C(324)–C(322) | 121.3(4) |
| O(1)–C(142)–H(70b)   | 110.1    | C(325)–C(324)–H(32H) | 119.4    |
| C(141)–C(142)–H(70b) | 110.1    | C(322)–C(324)–H(32H) | 119.4    |
| H(70a)–C(142)–H(70b) | 108.4    | C(327)–C(325)–C(324) | 118.4(3) |
| O(1)–C(143)–C(144)   | 108.8(3) | C(327)–C(325)–C(326) | 121.0(4) |
| O(1)–C(143)–H(43a)   | 109.9    | C(324)–C(325)–C(326) | 120.6(4) |
| C(144)–C(143)–H(43a) | 109.9    | C(325)–C(326)–H(32i) | 109.5    |
| O(1)–C(143)–H(43b)   | 109.9    | C(325)–C(326)–H(32j) | 109.5    |
| C(144)–C(143)–H(43b) | 109.9    | H(32i)–C(326)–H(32j) | 109.5    |
| H(43a)–C(143)–H(43b) | 108.3    | C(325)–C(326)–H(32K) | 109.5    |
| O(2)–C(144)–C(143)   | 107.9(3) | H(32i)–C(326)–H(32K) | 109.5    |
| O(2)–C(144)–H(93a)   | 110.1    | H(32j)–C(326)–H(32K) | 109.5    |
| C(143)–C(144)–H(93a) | 110.1    | C(325)–C(327)–C(328) | 122.3(4) |
| O(2)–C(144)–H(93b)   | 110.1    | C(325)–C(327)–H(32a) | 118.9    |
| C(143)–C(144)–H(93b) | 110.1    | C(328)–C(327)–H(32a) | 118.9    |
| H(93a)–C(144)–H(93b) | 108.4    | C(327)–C(328)–C(321) | 118.4(4) |
| O(2)–C(145)–C(146)   | 107.6(3) | C(327)–C(328)–C(329) | 119.5(3) |
| O(2)–C(145)–H(15e)   | 110.2    | C(321)–C(328)–C(329) | 122.1(3) |
| C(146)–C(145)–H(15e) | 110.2    | C(328)–C(329)–H(32b) | 109.5    |
| O(2)–C(145)–H(15F)   | 110.2    | C(328)–C(329)–H(32C) | 109.5    |
| C(146)–C(145)–H(15F) | 110.2    | H(32b)–C(329)–H(32C) | 109.5    |
| H(15e)–C(145)–H(15f) | 108.5    | C(328)–C(329)–H(32d) | 109.5    |
| O(3)–C(146)–C(145)   | 109.4(3) | H(32b)–C(329)–H(32d) | 109.5    |
| O(3)–C(146)–H(15C)   | 109.8    | H(32C)–C(329)–H(32d) | 109.5    |
| C(145)–C(146)–H(15C) | 109.8    | C(337)–C(330)–C(331) | 119.6(3) |
| O(3)–C(146)–H(15d)   | 109.8    | C(337)–C(330)–C(3m4) | 119.0(3) |
| C(145)–C(146)–H(15d) | 109.8    | C(331)–C(330)–C(3m4) | 121.4(3) |
| H(15C)–C(146)–H(15d) | 108.2    | C(330)–C(331)–C(333) | 118.9(4) |
| O(3)–C(147)–C(148)   | 109.5(3) | C(330)–C(331)–C(332) | 121.3(4) |
| O(3)–C(147)–H(94a)   | 109.8    | C(333)–C(331)–C(332) | 119.8(4) |
| C(148)–C(147)–H(94a) | 109.8    | C(331)–C(332)–H(33i) | 109.5    |

**Table S23.** Continued

| angle                | degree     | angle                | degree   |
|----------------------|------------|----------------------|----------|
| O(3)–C(147)–H(94b)   | 109.8      | C(331)–C(332)–H(33j) | 109.5    |
| C(148)–C(147)–H(94b) | 109.8      | H(33i)–C(332)–H(33j) | 109.5    |
| H(94a)–C(147)–H(94b) | 108.2      | C(331)–C(332)–H(33K) | 109.5    |
| O(4)–C(148)–C(147)   | 107.9(3)   | H(33i)–C(332)–H(33K) | 109.5    |
| O(4)–C(148)–H(14m)   | 110.1      | H(33j)–C(332)–H(33K) | 109.5    |
| C(147)–C(148)–H(14m) | 110.1      | C(334)–C(333)–C(331) | 121.8(4) |
| O(4)–C(148)–H(14e)   | 110.1      | C(334)–C(333)–H(33e) | 119.1    |
| C(147)–C(148)–H(14e) | 110.1      | C(331)–C(333)–H(33e) | 119.1    |
| H(14m)–C(148)–H(14e) | 108.4      | C(333)–C(334)–C(336) | 118.8(3) |
| O(4)–C(149)–C(150)   | 107.5(3)   | C(333)–C(334)–C(335) | 120.5(4) |
| O(4)–C(149)–H(15g)   | 110.2      | C(336)–C(334)–C(335) | 120.7(4) |
| C(150)–C(149)–H(15g) | 110.2      | C(334)–C(335)–H(33F) | 109.5    |
| O(4)–C(149)–H(15H)   | 110.2      | C(334)–C(335)–H(33g) | 109.5    |
| C(150)–C(149)–H(15H) | 110.2      | H(33f)–C(335)–H(33g) | 109.5    |
| H(15g)–C(149)–H(15H) | 108.5      | C(334)–C(335)–H(33H) | 109.5    |
| O(5)–C(150)–C(149)   | 107.3(3)   | H(33f)–C(335)–H(33H) | 109.5    |
| O(5)–C(150)–H(14C)   | 110.2      | H(33g)–C(335)–H(33H) | 109.5    |
| C(149)–C(150)–H(14C) | 110.2      | C(334)–C(336)–C(337) | 121.4(4) |
| O(5)–C(150)–H(14d)   | 110.2      | C(334)–C(336)–H(33a) | 119.3    |
| C(149)–C(150)–H(14d) | 110.2      | C(337)–C(336)–H(33a) | 119.3    |
| H(14C)–C(150)–H(14d) | 108.5      | C(336)–C(337)–C(330) | 119.5(4) |
| C(143)–O(1)–C(142)   | 112.3(3)   | C(336)–C(337)–C(338) | 119.5(3) |
| C(143)–O(1)–K(1)     | 119.1(2)   | C(330)–C(337)–C(338) | 120.9(3) |
| C(142)–O(1)–K(1)     | 117.42(19) | C(337)–C(338)–H(33b) | 109.5    |
| C(145)–O(2)–C(144)   | 112.4(3)   | C(337)–C(338)–H(33C) | 109.5    |
| C(145)–O(2)–K(1)     | 117.6(2)   | H(33b)–C(338)–H(33C) | 109.5    |
| C(144)–O(2)–K(1)     | 115.5(2)   | C(337)–C(338)–H(33d) | 109.5    |
| C(147)–O(3)–C(146)   | 110.7(3)   | H(33b)–C(338)–H(33d) | 109.5    |
| C(147)–O(3)–K(1)     | 112.0(2)   | H(33C)–C(338)–H(33d) | 109.5    |
| C(146)–O(3)–K(1)     | 114.5(2)   | C(349)–O(13)–C(339)  | 113.1(5) |
| C(148)–O(4)–C(149)   | 114.1(3)   | C(349)–O(13)–K(3)    | 118.7(4) |
| C(148)–O(4)–K(1)     | 126.6(2)   | C(339)–O(13)–K(3)    | 118.2(3) |
| C(149)–O(4)–K(1)     | 117.8(2)   | C(341)–O(14)–C(340)  | 112.2(6) |
| C(150)–O(5)–C(139)   | 114.6(3)   | C(341)–O(14)–K(3)    | 98.2(4)  |

**Table S23.** Continued

| angle              | degree     | angle                | degree   |
|--------------------|------------|----------------------|----------|
| C(150)–O(5)–K(1)   | 86.64(19)  | C(340)–O(14)–K(3)    | 104.1(3) |
| C(139)–O(5)–K(1)   | 110.31(19) | C(343)–O(15)–C(342)  | 113.7(5) |
| C(140)–O(6)–C(141) | 112.5(3)   | C(343)–O(15)–K(3)    | 129.4(4) |
| C(140)–O(6)–K(1)   | 112.5(2)   | C(342)–O(15)–K(3)    | 116.9(3) |
| C(141)–O(6)–K(1)   | 104.3(2)   | C(345)–O(17)–C(346)  | 113.5(5) |
| N(23)–Fe(2)–N(24)  | 89.70(11)  | C(345)–O(17)–K(3)    | 117.5(3) |
| N(23)–Fe(2)–N(22)  | 89.58(11)  | C(346)–O(17)–K(3)    | 109.4(3) |
| N(24)–Fe(2)–N(22)  | 178.23(13) | C(347)–O(18)–C(348)  | 113.4(4) |
| N(23)–Fe(2)–C(21)  | 93.11(14)  | C(347)–O(18)–K(3)    | 116.6(3) |
| N(24)–Fe(2)–C(21)  | 93.37(14)  | C(348)–O(18)–K(3)    | 117.4(3) |
| N(22)–Fe(2)–C(21)  | 85.06(13)  | O(13)–C(339)–C(340)  | 107.9(5) |
| N(23)–Fe(2)–C(22)  | 93.58(14)  | O(13)–C(339)–H(33L)  | 110.1    |
| N(24)–Fe(2)–C(22)  | 91.72(13)  | C(340)–C(339)–H(33L) | 110.1    |
| N(22)–Fe(2)–C(22)  | 89.93(13)  | O(13)–C(339)–H(33m)  | 110.1    |
| C(21)–Fe(2)–C(22)  | 171.61(14) | C(340)–C(339)–H(33m) | 110.1    |
| N(23)–Fe(2)–N(21)  | 178.38(13) | H(33L)–C(339)–H(33m) | 108.4    |
| N(24)–Fe(2)–N(21)  | 89.93(11)  | O(14)–C(340)–C(339)  | 108.2(4) |
| N(22)–Fe(2)–N(21)  | 90.83(11)  | O(14)–C(340)–H(34a)  | 110.1    |
| C(21)–Fe(2)–N(21)  | 88.49(13)  | C(339)–C(340)–H(34a) | 110.1    |
| C(22)–Fe(2)–N(21)  | 84.85(13)  | O(14)–C(340)–H(34b)  | 110.1    |
| O(8)–K(2)–O(10)    | 119.75(9)  | C(339)–C(340)–H(34b) | 110.1    |
| O(8)–K(2)–O(12b)   | 117.8(5)   | H(34a)–C(340)–H(34b) | 108.4    |
| O(10)–K(2)–O(12b)  | 111.7(5)   | O(14)–C(341)–C(342)  | 106.8(9) |
| O(8)–K(2)–O(7)     | 60.60(8)   | O(14)–C(341)–H(34C)  | 110.4    |
| O(10)–K(2)–O(7)    | 149.15(11) | C(342)–C(341)–H(34C) | 110.4    |
| O(12b)–K(2)–O(7)   | 57.3(5)    | O(14)–C(341)–H(34d)  | 110.4    |
| O(8)–K(2)–N(26)    | 82.48(9)   | C(342)–C(341)–H(34d) | 110.4    |
| O(10)–K(2)–N(26)   | 93.50(10)  | H(34C)–C(341)–H(34d) | 108.6    |
| O(12b)–K(2)–N(26)  | 127.5(4)   | O(15)–C(342)–C(341)  | 109.5(5) |
| O(7)–K(2)–N(26)    | 116.22(9)  | O(15)–C(342)–H(34e)  | 109.8    |
| O(8)–K(2)–O(9)     | 60.89(8)   | C(341)–C(342)–H(34e) | 109.8    |
| O(10)–K(2)–O(9)    | 59.70(9)   | O(15)–C(342)–H(34F)  | 109.8    |
| O(12b)–K(2)–O(9)   | 155.4(4)   | C(341)–C(342)–H(34F) | 109.8    |
| O(7)–K(2)–O(9)     | 116.76(9)  | H(34e)–C(342)–H(34F) | 108.2    |

**Table S23.** Continued

| angle               | degree     | angle                | degree    |
|---------------------|------------|----------------------|-----------|
| N(26)–K(2)–O(9)     | 77.02(9)   | O(15)–C(343)–C(344)  | 111.0(6)  |
| O(8)–K(2)–O(11b)    | 127.2(2)   | O(15)–C(343)–H(34g)  | 109.4     |
| O(10)–K(2)–O(11b)   | 59.77(19)  | C(344)–C(343)–H(34g) | 109.4     |
| O(12b)–K(2)–O(11b)  | 57.4(5)    | O(15)–C(343)–H(34H)  | 109.4     |
| O(7)–K(2)–O(11b)    | 94.39(19)  | C(344)–C(343)–H(34H) | 109.4     |
| N(26)–K(2)–O(11b)   | 146.4(2)   | H(34g)–C(343)–H(34H) | 108.0     |
| O(9)–K(2)–O(11b)    | 102.32(19) | O(16b)–C(344)–O(16a) | 58.6(16)  |
| O(8)–K(2)–O(12a)    | 120.4(2)   | O(16b)–C(344)–C(343) | 121.3(16) |
| O(10)–K(2)–O(12a)   | 114.5(2)   | O(16a)–C(344)–C(343) | 111.2(6)  |
| O(12b)–K(2)–O(12a)  | 10.2(5)    | O(16a)–C(2a)–C(345)  | 106.7(7)  |
| O(7)–K(2)–O(12a)    | 60.3(2)    | O(16a)–C(2a)–H(2a1)  | 110.4     |
| N(26)–K(2)–O(12a)   | 117.42(19) | C(345)–C(2a)–H(2a1)  | 110.4     |
| O(9)–K(2)–O(12a)    | 165.42(19) | O(16a)–C(2a)–H(2a2)  | 110.4     |
| O(11b)–K(2)–O(12a)  | 64.8(3)    | C(345)–C(2a)–H(2a2)  | 110.4     |
| O(8)–K(2)–O(11a)    | 150.72(12) | H(2a1)–C(2a)–H(2a2)  | 108.6     |
| O(10)–K(2)–O(11a)   | 56.64(11)  | C(344)–O(16a)–C(2a)  | 115.5(6)  |
| O(12b)–K(2)–O(11a)  | 55.1(5)    | C(344)–O(16a)–K(3)   | 110.8(4)  |
| O(7)–K(2)–O(11a)    | 106.57(11) | C(2a)–O(16a)–K(3)    | 117.3(4)  |
| N(26)–K(2)–O(11a)   | 125.43(12) | C(345)–C(2b)–O(16b)  | 146(3)    |
| O(9)–K(2)–O(11a)    | 112.51(11) | C(345)–C(2b)–H(2b1)  | 100.3     |
| O(11b)–K(2)–O(11a)  | 23.5(2)    | O(16b)–C(2b)–H(2b1)  | 100.3     |
| O(12a)–K(2)–O(11a)  | 58.5(2)    | C(345)–C(2b)–H(2b2)  | 100.3     |
| C(2a1)–N(21)–C(2a2) | 106.9(3)   | O(16b)–C(2b)–H(2b2)  | 100.3     |
| C(2a1)–N(21)–Fe(2)  | 127.0(2)   | H(2b1)–C(2b)–H(2b2)  | 104.3     |
| C(2a2)–N(21)–Fe(2)  | 125.6(2)   | C(344)–O(16b)–C(2b)  | 106(3)    |
| C(2a3)–N(22)–C(2a4) | 106.5(3)   | C(344)–O(16b)–K(3)   | 114.3(18) |
| C(2a3)–N(22)–Fe(2)  | 126.4(2)   | C(2b)–O(16b)–K(3)    | 87.5(19)  |
| C(2a4)–N(22)–Fe(2)  | 126.7(2)   | O(17)–C(345)–C(2a)   | 111.2(6)  |
| C(2a6)–N(23)–C(2a5) | 106.6(3)   | O(17)–C(345)–C(2b)   | 98(2)     |
| C(2a6)–N(23)–Fe(2)  | 126.5(2)   | O(17)–C(346)–C(347)  | 108.8(5)  |
| C(2a5)–N(23)–Fe(2)  | 126.9(2)   | O(17)–C(346)–H(34m)  | 109.9     |
| C(2a7)–N(24)–C(2a8) | 106.3(3)   | C(347)–C(346)–H(34m) | 109.9     |
| C(2a7)–N(24)–Fe(2)  | 126.8(2)   | O(17)–C(346)–H(34N)  | 109.9     |
| C(2a8)–N(24)–Fe(2)  | 126.9(2)   | C(347)–C(346)–H(34N) | 109.9     |

**Table S23.** Continued

| angle                | degree   | angle                | degree    |
|----------------------|----------|----------------------|-----------|
| C(22)–N(26)–K(2)     | 169.1(3) | H(34m)–C(346)–H(34N) | 108.3     |
| N(21)–C(2a1)–C(2m4)  | 125.6(3) | O(18)–C(347)–C(346)  | 108.5(4)  |
| N(21)–C(2a1)–C(2b1)  | 109.7(3) | O(18)–C(347)–H(34O)  | 110.0     |
| C(2m4)–C(2a1)–C(2b1) | 124.6(3) | C(346)–C(347)–H(34O) | 110.0     |
| N(21)–C(2a2)–C(2m1)  | 125.3(3) | O(18)–C(347)–H(34P)  | 110.0     |
| N(21)–C(2a2)–C(2b2)  | 109.3(3) | C(346)–C(347)–H(34P) | 110.0     |
| C(2m1)–C(2a2)–C(2b2) | 125.0(3) | H(34O)–C(347)–H(34P) | 108.4     |
| N(22)–C(2a3)–C(2m1)  | 125.7(3) | O(18)–C(348)–C(349)  | 108.4(4)  |
| N(22)–C(2a3)–C(2b3)  | 109.7(3) | O(18)–C(348)–H(34Q)  | 110.0     |
| C(2m1)–C(2a3)–C(2b3) | 124.4(3) | C(349)–C(348)–H(34Q) | 110.0     |
| N(22)–C(2a4)–C(2m2)  | 125.2(3) | O(18)–C(348)–H(34R)  | 110.0     |
| N(22)–C(2a4)–C(2b4)  | 109.8(3) | C(349)–C(348)–H(34R) | 110.0     |
| C(2m2)–C(2a4)–C(2b4) | 124.7(3) | H(34Q)–C(348)–H(34R) | 108.4     |
| N(23)–C(2a5)–C(2m2)  | 125.9(3) | O(13)–C(349)–C(348)  | 109.0(6)  |
| N(23)–C(2a5)–C(2b5)  | 109.5(3) | O(13)–C(349)–H(34S)  | 109.9     |
| C(2m2)–C(2a5)–C(2b5) | 124.3(3) | C(348)–C(349)–H(34S) | 109.9     |
| N(23)–C(2a6)–C(2m3)  | 125.5(3) | O(13)–C(349)–H(34T)  | 109.9     |
| N(23)–C(2a6)–C(2b6)  | 109.3(3) | C(348)–C(349)–H(34T) | 109.9     |
| C(2m3)–C(2a6)–C(2b6) | 124.2(3) | H(34S)–C(349)–H(34T) | 108.3     |
| N(24)–C(2a7)–C(2m3)  | 126.0(3) | C(361)–O(19)–C(350)  | 109.1(19) |
| N(24)–C(2a7)–C(2b7)  | 109.9(3) | C(361)–O(19)–K(3)    | 109.7(17) |
| C(2m3)–C(2a7)–C(2b7) | 124.0(3) | C(350)–O(19)–K(3)    | 115.7(14) |
| N(24)–C(2a8)–C(2m4)  | 124.8(3) | C(352)–O(20)–C(351)  | 119(3)    |
| N(24)–C(2a8)–C(2b8)  | 109.9(3) | C(352)–O(20)–K(3)    | 114.5(17) |
| C(2m4)–C(2a8)–C(2b8) | 124.3(3) | C(351)–O(20)–K(3)    | 111.7(18) |
| C(2b2)–C(2b1)–C(2a1) | 107.0(3) | C(353)–O(21)–C(354)  | 118(3)    |
| C(2b2)–C(2b1)–H(2bd) | 126.5    | C(353)–O(21)–K(3)    | 118(2)    |
| C(2a1)–C(2b1)–H(2bd) | 126.5    | C(354)–O(21)–K(3)    | 106.8(16) |
| C(2b1)–C(2b2)–C(2a2) | 107.0(3) | C(356)–O(22)–C(355)  | 114.0(19) |
| C(2b1)–C(2b2)–H(2bH) | 126.5    | C(356)–O(22)–K(3)    | 111.0(15) |
| C(2a2)–C(2b2)–H(2bH) | 126.5    | C(355)–O(22)–K(3)    | 121.2(15) |
| C(2b4)–C(2b3)–C(2a3) | 107.2(3) | C(358)–O(23)–C(357)  | 112(2)    |
| C(2b4)–C(2b3)–H(2bC) | 126.4    | C(358)–O(23)–K(3)    | 115.1(13) |
| C(2a3)–C(2b3)–H(2bC) | 126.4    | C(357)–O(23)–K(3)    | 122.7(16) |



**Table S23.** Continued

| angle                | degree   | angle                | degree    |
|----------------------|----------|----------------------|-----------|
| C(2b3)–C(2b4)–C(2a4) | 106.7(3) | C(359)–O(24)–C(360)  | 114(2)    |
| C(2b3)–C(2b4)–H(2ba) | 126.6    | C(359)–O(24)–K(3)    | 114.2(15) |
| C(2a4)–C(2b4)–H(2ba) | 126.6    | C(360)–O(24)–K(3)    | 120.5(16) |
| C(2b6)–C(2b5)–C(2a5) | 107.3(3) | O(19)–C(350)–C(351)  | 105(2)    |
| C(2b6)–C(2b5)–H(2bb) | 126.4    | O(19)–C(350)–H(35d)  | 110.7     |
| C(2a5)–C(2b5)–H(2bb) | 126.4    | C(351)–C(350)–H(35d) | 110.7     |
| C(2b5)–C(2b6)–C(2a6) | 107.2(3) | O(19)–C(350)–H(35e)  | 110.7     |
| C(2b5)–C(2b6)–H(2be) | 126.4    | C(351)–C(350)–H(35e) | 110.7     |
| C(2a6)–C(2b6)–H(2be) | 126.4    | H(35d)–C(350)–H(35e) | 108.8     |
| C(2b8)–C(2b7)–C(2a7) | 106.6(3) | O(20)–C(351)–C(350)  | 109(2)    |
| C(2b8)–C(2b7)–H(2bF) | 126.7    | O(20)–C(351)–H(35F)  | 109.8     |
| C(2a7)–C(2b7)–H(2bF) | 126.7    | C(350)–C(351)–H(35F) | 109.8     |
| C(2b7)–C(2b8)–C(2a8) | 107.2(3) | O(20)–C(351)–H(35g)  | 109.8     |
| C(2b7)–C(2b8)–H(2bg) | 126.4    | C(350)–C(351)–H(35g) | 109.8     |
| C(2a8)–C(2b8)–H(2bg) | 126.4    | H(35f)–C(351)–H(35g) | 108.2     |
| C(2a2)–C(2m1)–C(2a3) | 123.3(3) | O(20)–C(352)–C(353)  | 109(3)    |
| C(2a2)–C(2m1)–C(23)  | 118.2(3) | O(20)–C(352)–H(35H)  | 109.9     |
| C(2a3)–C(2m1)–C(23)  | 118.4(3) | C(353)–C(352)–H(35H) | 109.9     |
| C(2a5)–C(2m2)–C(2a4) | 121.6(3) | O(20)–C(352)–H(35i)  | 109.9     |
| C(2a5)–C(2m2)–C(212) | 117.9(3) | C(353)–C(352)–H(35i) | 109.9     |
| C(2a4)–C(2m2)–C(212) | 120.5(3) | H(35H)–C(352)–H(35i) | 108.3     |
| C(2a6)–C(2m3)–C(2a7) | 121.3(3) | O(21)–C(353)–C(352)  | 111(3)    |
| C(2a6)–C(2m3)–C(221) | 121.6(3) | O(21)–C(353)–H(35j)  | 109.4     |
| C(2a7)–C(2m3)–C(221) | 117.1(3) | C(352)–C(353)–H(35j) | 109.4     |
| C(2a8)–C(2m4)–C(2a1) | 122.8(3) | O(21)–C(353)–H(35K)  | 109.4     |
| C(2a8)–C(2m4)–C(230) | 118.5(3) | C(352)–C(353)–H(35K) | 109.4     |
| C(2a1)–C(2m4)–C(230) | 118.6(3) | H(35j)–C(353)–H(35K) | 108.0     |
| N(25)–C(21)–Fe(2)    | 174.0(3) | O(21)–C(354)–C(355)  | 110(2)    |
| N(26)–C(22)–Fe(2)    | 171.9(3) | O(21)–C(354)–H(35L)  | 109.7     |
| C(24)–C(23)–C(210)   | 120.2(3) | C(355)–C(354)–H(35L) | 109.7     |
| C(24)–C(23)–C(2m1)   | 119.6(3) | O(21)–C(354)–H(35m)  | 109.7     |
| C(210)–C(23)–C(2m1)  | 120.3(3) | C(355)–C(354)–H(35m) | 109.7     |
| C(26)–C(24)–C(23)    | 119.5(4) | H(35L)–C(354)–H(35m) | 108.2     |
| C(26)–C(24)–C(25)    | 119.6(4) | O(22)–C(355)–C(354)  | 110(2)    |

**Table S23.** Continued

| angle                | degree   | angle                | degree    |
|----------------------|----------|----------------------|-----------|
| C(23)–C(24)–C(25)    | 121.0(3) | O(22)–C(355)–H(35N)  | 109.8     |
| C(24)–C(25)–H(25a)   | 109.5    | C(354)–C(355)–H(35N) | 109.8     |
| C(24)–C(25)–H(25b)   | 109.5    | O(22)–C(355)–H(35O)  | 109.8     |
| H(25a)–C(25)–H(25b)  | 109.5    | C(354)–C(355)–H(35O) | 109.8     |
| C(24)–C(25)–H(25C)   | 109.5    | H(35N)–C(355)–H(35O) | 108.2     |
| H(25a)–C(25)–H(25C)  | 109.5    | O(22)–C(356)–C(357)  | 112(2)    |
| H(25b)–C(25)–H(25C)  | 109.5    | O(22)–C(356)–H(35P)  | 109.2     |
| C(27)–C(26)–C(24)    | 121.7(4) | C(357)–C(356)–H(35P) | 109.2     |
| C(27)–C(26)–H(26a)   | 119.1    | O(22)–C(356)–H(35Q)  | 109.2     |
| C(24)–C(26)–H(26a)   | 119.1    | C(357)–C(356)–H(35Q) | 109.2     |
| C(26)–C(27)–C(29)    | 118.3(4) | H(35P)–C(356)–H(35Q) | 107.9     |
| C(26)–C(27)–C(28)    | 120.7(5) | O(23)–C(357)–C(356)  | 109(2)    |
| C(29)–C(27)–C(28)    | 121.0(5) | O(23)–C(357)–H(35R)  | 109.9     |
| C(27)–C(28)–H(28a)   | 109.5    | C(356)–C(357)–H(35R) | 109.9     |
| C(27)–C(28)–H(28b)   | 109.5    | O(23)–C(357)–H(35S)  | 109.9     |
| H(28a)–C(28)–H(28b)  | 109.5    | C(356)–C(357)–H(35S) | 109.9     |
| C(27)–C(28)–H(28C)   | 109.5    | H(35R)–C(357)–H(35S) | 108.3     |
| H(28a)–C(28)–H(28C)  | 109.5    | O(23)–C(358)–C(359)  | 111.5(19) |
| H(28b)–C(28)–H(28C)  | 109.5    | O(23)–C(358)–H(35T)  | 109.3     |
| C(27)–C(29)–C(210)   | 122.5(4) | C(359)–C(358)–H(35T) | 109.3     |
| C(27)–C(29)–H(29a)   | 118.8    | O(23)–C(358)–H(35U)  | 109.3     |
| C(210)–C(29)–H(29a)  | 118.8    | C(359)–C(358)–H(35U) | 109.3     |
| C(29)–C(210)–C(23)   | 117.8(4) | H(35T)–C(358)–H(35U) | 108.0     |
| C(29)–C(210)–C(211)  | 120.2(4) | O(24)–C(359)–C(358)  | 112(2)    |
| C(23)–C(210)–C(211)  | 122.0(4) | O(24)–C(359)–H(35V)  | 109.3     |
| C(210)–C(211)–H(21i) | 109.5    | C(358)–C(359)–H(35V) | 109.3     |
| C(210)–C(211)–H(21j) | 109.5    | O(24)–C(359)–H(35W)  | 109.3     |
| H(21i)–C(211)–H(21j) | 109.5    | C(358)–C(359)–H(35W) | 109.3     |
| C(210)–C(211)–H(21K) | 109.5    | H(35V)–C(359)–H(35W) | 107.9     |
| H(21i)–C(211)–H(21K) | 109.5    | O(24)–C(360)–C(361)  | 106(3)    |
| H(21j)–C(211)–H(21K) | 109.5    | C(361)–C(360)–K(3)   | 78(2)     |
| C(219)–C(212)–C(213) | 119.9(3) | O(24)–C(360)–H(36b)  | 110.5     |
| C(219)–C(212)–C(2m2) | 118.5(3) | C(361)–C(360)–H(36b) | 110.5     |
| C(213)–C(212)–C(2m2) | 121.4(3) | K(3)–C(360)–H(36b)   | 95.9      |

**Table S23.** Continued

| angle                | degree   | angle                | degree |
|----------------------|----------|----------------------|--------|
| C(215)–C(213)–C(212) | 119.2(3) | O(24)–C(360)–H(36C)  | 110.5  |
| C(215)–C(213)–C(214) | 119.2(3) | C(361)–C(360)–H(36C) | 110.5  |
| C(212)–C(213)–C(214) | 121.6(3) | K(3)–C(360)–H(36C)   | 147.7  |
| C(213)–C(214)–H(21a) | 109.5    | H(36b)–C(360)–H(36C) | 108.7  |
| C(213)–C(214)–H(21b) | 109.5    | O(19)–C(361)–C(360)  | 109(2) |
| H(21a)–C(214)–H(21b) | 109.5    | O(19)–C(361)–H(36d)  | 109.8  |
| C(213)–C(214)–H(21C) | 109.5    | C(360)–C(361)–H(36d) | 109.8  |
| H(21a)–C(214)–H(21C) | 109.5    | O(19)–C(361)–H(36e)  | 109.8  |
| H(21b)–C(214)–H(21C) | 109.5    | C(360)–C(361)–H(36e) | 109.8  |
| C(216)–C(215)–C(213) | 121.8(3) | H(36d)–C(361)–H(36e) | 108.2  |
| C(216)–C(215)–H(21d) | 119.1    | C(45)–O(26)–C(48)    | 104.4  |
| C(213)–C(215)–H(21d) | 119.1    | O(26)–C(45)–C(46)    | 104.2  |
| C(215)–C(216)–C(218) | 117.9(4) | O(26)–C(45)–H(42C)   | 110.9  |
| C(215)–C(216)–C(217) | 121.6(4) | C(46)–C(45)–H(42C)   | 110.9  |
| C(218)–C(216)–C(217) | 120.4(4) | O(26)–C(45)–H(42d)   | 110.9  |
| C(216)–C(217)–H(21F) | 109.5    | C(46)–C(45)–H(42d)   | 110.9  |
| C(216)–C(217)–H(21g) | 109.5    | H(42C)–C(45)–H(42d)  | 108.9  |
| H(21f)–C(217)–H(21g) | 109.5    | C(45)–C(46)–C(47)    | 103.7  |
| C(216)–C(217)–H(21H) | 109.5    | C(45)–C(46)–H(42K)   | 111.0  |
| H(21f)–C(217)–H(21H) | 109.5    | C(47)–C(46)–H(42K)   | 111.0  |
| H(21g)–C(217)–H(21H) | 109.5    | C(45)–C(46)–H(42L)   | 111.0  |
| C(216)–C(218)–C(219) | 122.1(4) | C(47)–C(46)–H(42L)   | 111.0  |
| C(216)–C(218)–H(21e) | 118.9    | H(42K)–C(46)–H(42L)  | 109.0  |
| C(219)–C(218)–H(21e) | 118.9    | C(48)–C(47)–C(46)    | 104.4  |
| C(218)–C(219)–C(212) | 118.9(3) | C(48)–C(47)–H(42m)   | 110.9  |
| C(218)–C(219)–C(220) | 119.1(4) | C(46)–C(47)–H(42m)   | 110.9  |
| C(212)–C(219)–C(220) | 121.9(4) | C(48)–C(47)–H(42N)   | 110.9  |
| C(219)–C(220)–H(22a) | 109.5    | C(46)–C(47)–H(42N)   | 110.9  |
| C(219)–C(220)–H(22b) | 109.5    | H(42m)–C(47)–H(42N)  | 108.9  |
| H(22a)–C(220)–H(22b) | 109.5    | O(26)–C(48)–C(47)    | 105.4  |
| C(219)–C(220)–H(22C) | 109.5    | O(26)–C(48)–H(43j)   | 110.7  |
| H(22a)–C(220)–H(22C) | 109.5    | C(47)–C(48)–H(43j)   | 110.7  |
| H(22b)–C(220)–H(22C) | 109.5    | O(26)–C(48)–H(43K)   | 110.7  |
| C(222)–C(221)–C(228) | 120.7(4) | C(47)–C(48)–H(43K)   | 110.7  |

**Table S23.** Continued

| angle                | degree   | angle               | degree   |
|----------------------|----------|---------------------|----------|
| C(222)–C(221)–C(2m3) | 118.0(4) | H(43j)–C(48)–H(43K) | 108.8    |
| C(228)–C(221)–C(2m3) | 121.2(4) | C(49)–O(27)–C(52)   | 109.0(4) |
| C(221)–C(222)–C(224) | 118.9(4) | O(27)–C(49)–C(50)   | 106.7(4) |
| C(221)–C(222)–C(223) | 121.7(4) | O(27)–C(49)–H(42a)  | 110.4    |
| C(224)–C(222)–C(223) | 119.3(4) | C(50)–C(49)–H(42a)  | 110.4    |
| C(222)–C(223)–H(22F) | 109.5    | O(27)–C(49)–H(42b)  | 110.4    |
| C(222)–C(223)–H(22g) | 109.5    | C(50)–C(49)–H(42b)  | 110.4    |
| H(22f)–C(223)–H(22g) | 109.5    | H(42a)–C(49)–H(42b) | 108.6    |
| C(222)–C(223)–H(22H) | 109.5    | C(51)–C(50)–C(49)   | 102.4(4) |
| H(22f)–C(223)–H(22H) | 109.5    | C(51)–C(50)–H(42e)  | 111.3    |
| H(22g)–C(223)–H(22H) | 109.5    | C(49)–C(50)–H(42e)  | 111.3    |
| C(225)–C(224)–C(222) | 121.4(5) | C(51)–C(50)–H(42F)  | 111.3    |
| C(225)–C(224)–H(22d) | 119.3    | C(49)–C(50)–H(42F)  | 111.3    |
| C(222)–C(224)–H(22d) | 119.3    | H(42e)–C(50)–H(42f) | 109.2    |
| C(227)–C(225)–C(224) | 118.6(4) | C(50)–C(51)–C(52)   | 101.5(4) |
| C(227)–C(225)–C(226) | 119.5(5) | C(50)–C(51)–H(42g)  | 111.5    |
| C(224)–C(225)–C(226) | 121.8(5) | C(52)–C(51)–H(42g)  | 111.5    |
| C(225)–C(226)–H(22L) | 109.5    | C(50)–C(51)–H(42H)  | 111.5    |
| C(225)–C(226)–H(22m) | 109.5    | C(52)–C(51)–H(42H)  | 111.5    |
| H(22L)–C(226)–H(22m) | 109.5    | H(42g)–C(51)–H(42H) | 109.3    |
| C(225)–C(226)–H(22N) | 109.5    | O(27)–C(52)–C(51)   | 107.1(4) |
| H(22L)–C(226)–H(22N) | 109.5    | O(27)–C(52)–H(42i)  | 110.3    |
| H(22m)–C(226)–H(22N) | 109.5    | C(51)–C(52)–H(42i)  | 110.3    |
| C(225)–C(227)–C(228) | 122.4(4) | O(27)–C(52)–H(42j)  | 110.3    |
| C(225)–C(227)–H(22e) | 118.8    | C(51)–C(52)–H(42j)  | 110.3    |
| C(228)–C(227)–H(22e) | 118.8    | H(42i)–C(52)–H(42j) | 108.6    |
| C(227)–C(228)–C(221) | 117.8(4) | C(56)–O(28)–C(53)   | 100.5(6) |
| C(227)–C(228)–C(229) | 120.1(4) | C(54)–C(53)–O(28)   | 102.7(6) |
| C(221)–C(228)–C(229) | 122.1(4) | C(54)–C(53)–H(43m)  | 111.2    |
| C(228)–C(229)–H(22i) | 109.5    | O(28)–C(53)–H(43m)  | 111.2    |
| C(228)–C(229)–H(22j) | 109.5    | C(54)–C(53)–H(43g)  | 111.2    |
| H(22i)–C(229)–H(22j) | 109.5    | O(28)–C(53)–H(43g)  | 111.2    |
| C(228)–C(229)–H(22K) | 109.5    | H(43m)–C(53)–H(43g) | 109.1    |
| H(22i)–C(229)–H(22K) | 109.5    | C(55)–C(54)–C(53)   | 108.5(7) |

**Table S23.** Continued

| angle                | degree   | angle               | degree   |
|----------------------|----------|---------------------|----------|
| H(22j)–C(229)–H(22K) | 109.5    | C(55)–C(54)–H(43e)  | 110.0    |
| C(231)–C(230)–C(237) | 120.1(3) | C(53)–C(54)–H(43e)  | 110.0    |
| C(231)–C(230)–C(2m4) | 121.3(3) | C(55)–C(54)–H(43F)  | 110.0    |
| C(237)–C(230)–C(2m4) | 118.6(3) | C(53)–C(54)–H(43F)  | 110.0    |
| C(233)–C(231)–C(230) | 118.9(3) | H(43e)–C(54)–H(43f) | 108.4    |
| C(233)–C(231)–C(232) | 119.1(3) | C(56)–C(55)–C(54)   | 109.2(6) |
| C(230)–C(231)–C(232) | 122.0(3) | C(56)–C(55)–H(55a)  | 109.8    |
| C(231)–C(232)–H(23C) | 109.5    | C(54)–C(55)–H(55a)  | 109.8    |
| C(231)–C(232)–H(23d) | 109.5    | C(56)–C(55)–H(55b)  | 109.8    |
| H(23C)–C(232)–H(23d) | 109.5    | C(54)–C(55)–H(55b)  | 109.8    |
| C(231)–C(232)–H(23e) | 109.5    | H(55a)–C(55)–H(55b) | 108.3    |
| H(23C)–C(232)–H(23e) | 109.5    | C(55)–C(56)–O(28)   | 104.9(6) |
| H(23d)–C(232)–H(23e) | 109.5    | C(55)–C(56)–H(43H)  | 110.8    |
| C(234)–C(233)–C(231) | 121.8(3) | O(28)–C(56)–H(43H)  | 110.8    |
| C(234)–C(233)–H(23b) | 119.1    | C(55)–C(56)–H(43i)  | 110.8    |
| C(231)–C(233)–H(23b) | 119.1    | O(28)–C(56)–H(43i)  | 110.8    |
| C(236)–C(234)–C(233) | 118.7(3) | H(43H)–C(56)–H(43i) | 108.8    |
| C(236)–C(234)–C(235) | 121.1(4) | C(64)–O(30)–C(61)   | 103.5(5) |
| C(233)–C(234)–C(235) | 120.3(4) | O(30)–C(61)–C(62)   | 103.6(5) |
| C(234)–C(235)–H(23i) | 109.5    | O(30)–C(61)–H(61a)  | 111.1    |
| C(234)–C(235)–H(23j) | 109.5    | C(62)–C(61)–H(61a)  | 111.1    |
| H(23i)–C(235)–H(23j) | 109.5    | O(30)–C(61)–H(61b)  | 111.1    |
| C(234)–C(235)–H(23K) | 109.5    | C(62)–C(61)–H(61b)  | 111.1    |
| H(23i)–C(235)–H(23K) | 109.5    | H(61a)–C(61)–H(61b) | 109.0    |
| H(23j)–C(235)–H(23K) | 109.5    | C(63)–C(62)–C(61)   | 102.3(5) |
| C(234)–C(236)–C(237) | 121.2(3) | C(63)–C(62)–H(62a)  | 111.3    |
| C(234)–C(236)–H(23a) | 119.4    | C(61)–C(62)–H(62a)  | 111.3    |
| C(237)–C(236)–H(23a) | 119.4    | C(63)–C(62)–H(62b)  | 111.3    |
| C(230)–C(237)–C(236) | 119.3(3) | C(61)–C(62)–H(62b)  | 111.3    |
| C(230)–C(237)–C(238) | 121.0(3) | H(62a)–C(62)–H(62b) | 109.2    |
| C(236)–C(237)–C(238) | 119.7(3) | C(64)–C(63)–C(62)   | 107.4(5) |
| C(237)–C(238)–H(23F) | 109.5    | C(64)–C(63)–H(63a)  | 110.2    |
| C(237)–C(238)–H(23g) | 109.5    | C(62)–C(63)–H(63a)  | 110.2    |
| H(23f)–C(238)–H(23g) | 109.5    | C(64)–C(63)–H(63b)  | 110.2    |

**Table S23.** Continued

| angle                | degree   | angle                | degree   |
|----------------------|----------|----------------------|----------|
| C(237)–C(238)–H(23H) | 109.5    | C(62)–C(63)–H(63b)   | 110.2    |
| H(23f)–C(238)–H(23H) | 109.5    | H(63a)–C(63)–H(63b)  | 108.5    |
| H(23g)–C(238)–H(23H) | 109.5    | O(30)–C(64)–C(63)    | 108.5(5) |
| O(7)–C(239)–C(240)   | 109.3(3) | O(30)–C(64)–H(64a)   | 110.0    |
| O(7)–C(239)–H(16C)   | 109.8    | C(63)–C(64)–H(64a)   | 110.0    |
| C(240)–C(239)–H(16C) | 109.8    | O(30)–C(64)–H(64b)   | 110.0    |
| O(7)–C(239)–H(16d)   | 109.8    | C(63)–C(64)–H(64b)   | 110.0    |
| C(240)–C(239)–H(16d) | 109.8    | H(64a)–C(64)–H(64b)  | 108.4    |
| H(16C)–C(239)–H(16d) | 108.3    | C(41)–O(25)–C(44)    | 104.2(3) |
| O(8)–C(240)–C(239)   | 108.4(3) | O(25)–C(41)–C(42)    | 104.4(3) |
| O(8)–C(240)–H(15a)   | 110.0    | O(25)–C(41)–H(24m)   | 110.9    |
| C(239)–C(240)–H(15a) | 110.0    | C(42)–C(41)–H(24m)   | 110.9    |
| O(8)–C(240)–H(15b)   | 110.0    | O(25)–C(41)–H(24N)   | 110.9    |
| C(239)–C(240)–H(15b) | 110.0    | C(42)–C(41)–H(24N)   | 110.9    |
| H(15a)–C(240)–H(15b) | 108.4    | H(24m)–C(41)–H(24N)  | 108.9    |
| O(8)–C(241)–C(242)   | 109.2(3) | C(41)–C(42)–C(43)    | 103.9(3) |
| O(8)–C(241)–H(41a)   | 109.8    | C(41)–C(42)–H(24i)   | 111.0    |
| C(242)–C(241)–H(41a) | 109.8    | C(43)–C(42)–H(24i)   | 111.0    |
| O(8)–C(241)–H(41b)   | 109.8    | C(41)–C(42)–H(24j)   | 111.0    |
| C(242)–C(241)–H(41b) | 109.8    | C(43)–C(42)–H(24j)   | 111.0    |
| H(41a)–C(241)–H(41b) | 108.3    | H(24i)–C(42)–H(24j)  | 109.0    |
| O(9)–C(242)–C(241)   | 108.5(3) | C(44)–C(43)–C(42)    | 104.0(3) |
| O(9)–C(242)–H(24O)   | 110.0    | C(44)–C(43)–H(24C)   | 111.0    |
| C(241)–C(242)–H(24O) | 110.0    | C(42)–C(43)–H(24C)   | 111.0    |
| O(9)–C(242)–H(24P)   | 110.0    | C(44)–C(43)–H(24d)   | 111.0    |
| C(241)–C(242)–H(24P) | 110.0    | C(42)–C(43)–H(24d)   | 111.0    |
| H(24O)–C(242)–H(24P) | 108.4    | H(24C)–C(43)–H(24d)  | 109.0    |
| O(9)–C(243)–C(244)   | 109.4(4) | O(25)–C(44)–C(43)    | 105.7(3) |
| O(9)–C(243)–H(24Q)   | 109.8    | O(25)–C(44)–H(24a)   | 110.6    |
| C(244)–C(243)–H(24Q) | 109.8    | C(43)–C(44)–H(24a)   | 110.6    |
| O(9)–C(243)–H(24R)   | 109.8    | O(25)–C(44)–H(24b)   | 110.6    |
| C(244)–C(243)–H(24R) | 109.8    | C(43)–C(44)–H(24b)   | 110.6    |
| H(24Q)–C(243)–H(24R) | 108.2    | H(24a)–C(44)–H(24b)  | 108.7    |
| O(10)–C(244)–C(243)  | 109.8(3) | C(60a)–O(29a)–C(57a) | 113.5    |

**Table S23.** Continued

| angle                | degree    | angle                | degree |
|----------------------|-----------|----------------------|--------|
| O(10)–C(244)–H(18F)  | 109.7     | O(29a)–C(57a)–C(58a) | 100.1  |
| C(243)–C(244)–H(18F) | 109.7     | O(29a)–C(57a)–H(57a) | 111.8  |
| O(10)–C(244)–H(18g)  | 109.7     | C(58a)–C(57a)–H(57a) | 111.8  |
| C(243)–C(244)–H(18g) | 109.7     | O(29a)–C(57a)–H(57b) | 111.8  |
| H(18f)–C(244)–H(18g) | 108.2     | C(58a)–C(57a)–H(57b) | 111.8  |
| C(26b)–C(245)–O(10)  | 103.4(8)  | H(57a)–C(57a)–H(57b) | 109.5  |
| O(10)–C(245)–C(26a)  | 111.9(5)  | C(59a)–C(58a)–C(57a) | 106.7  |
| C(26b)–C(245)–H(18i) | 90.8      | C(59a)–C(58a)–H(58a) | 110.4  |
| O(10)–C(245)–H(18i)  | 109.2     | C(57a)–C(58a)–H(58a) | 110.4  |
| C(26a)–C(245)–H(18i) | 109.2     | C(59a)–C(58a)–H(58b) | 110.4  |
| C(26b)–C(245)–H(18j) | 133.7     | C(57a)–C(58a)–H(58b) | 110.4  |
| O(10)–C(245)–H(18j)  | 109.2     | H(58a)–C(58a)–H(58b) | 108.6  |
| C(26a)–C(245)–H(18j) | 109.2     | C(58a)–C(59a)–C(60a) | 102.2  |
| H(18i)–C(245)–H(18j) | 107.9     | C(58a)–C(59a)–H(59a) | 111.3  |
| O(12b)–C(248)–C(249) | 111.0(10) | C(60a)–C(59a)–H(59a) | 111.3  |
| O(12a)–C(248)–C(249) | 109.1(6)  | C(58a)–C(59a)–H(59b) | 111.3  |
| O(12b)–C(248)–H(24K) | 89.7      | C(60a)–C(59a)–H(59b) | 111.3  |
| C(249)–C(248)–H(24K) | 109.9     | H(59a)–C(59a)–H(59b) | 109.2  |
| O(12b)–C(248)–H(24L) | 125.5     | O(29a)–C(60a)–C(59a) | 100.5  |
| C(249)–C(248)–H(24L) | 109.9     | O(29a)–C(60a)–H(60a) | 111.7  |
| O(7)–C(249)–C(248)   | 110.5(4)  | C(59a)–C(60a)–H(60a) | 111.7  |
| O(7)–C(249)–H(18d)   | 109.5     | O(29a)–C(60a)–H(60b) | 111.7  |
| C(248)–C(249)–H(18d) | 109.5     | C(59a)–C(60a)–H(60b) | 111.7  |
| O(7)–C(249)–H(18e)   | 109.5     | H(60a)–C(60a)–H(60b) | 109.4  |
| C(248)–C(249)–H(18e) | 109.5     | C(60b)–O(29b)–C(57b) | 104.6  |
| H(18d)–C(249)–H(18e) | 108.1     | O(29b)–C(57b)–C(58b) | 113.4  |
| C(249)–O(7)–C(239)   | 111.8(3)  | O(29b)–C(57b)–H(57C) | 108.9  |
| C(249)–O(7)–K(2)     | 114.7(2)  | C(58b)–C(57b)–H(57C) | 108.9  |
| C(239)–O(7)–K(2)     | 113.8(2)  | O(29b)–C(57b)–H(57d) | 108.9  |
| C(240)–O(8)–C(241)   | 112.8(3)  | C(58b)–C(57b)–H(57d) | 108.9  |
| C(240)–O(8)–K(2)     | 118.8(2)  | H(57C)–C(57b)–H(57d) | 107.7  |
| C(241)–O(8)–K(2)     | 118.8(2)  | C(57b)–C(58b)–C(59b) | 103.8  |
| C(243)–O(9)–C(242)   | 112.3(3)  | C(57b)–C(58b)–H(58C) | 111.0  |
| C(243)–O(9)–K(2)     | 103.0(2)  | C(59b)–C(58b)–H(58C) | 111.0  |

**Table S23.** Continued

| angle                | degree   | angle                | degree   |
|----------------------|----------|----------------------|----------|
| C(242)–O(9)–K(2)     | 105.5(2) | C(57b)–C(58b)–H(58d) | 111.0    |
| C(244)–O(10)–C(245)  | 114.0(3) | C(59b)–C(58b)–H(58d) | 111.0    |
| C(244)–O(10)–K(2)    | 119.5(2) | H(58C)–C(58b)–H(58d) | 109.0    |
| C(245)–O(10)–K(2)    | 124.1(3) | C(60b)–C(59b)–C(58b) | 104.3    |
| O(12a)–C(1a)–C(27a)  | 114.7(7) | C(60b)–C(59b)–H(59C) | 110.9    |
| O(12a)–C(1a)–H(1a1)  | 108.6    | C(58b)–C(59b)–H(59C) | 110.9    |
| C(27a)–C(1a)–H(1a1)  | 108.6    | C(60b)–C(59b)–H(59d) | 110.9    |
| O(12a)–C(1a)–H(1a2)  | 108.6    | C(58b)–C(59b)–H(59d) | 110.9    |
| C(27a)–C(1a)–H(1a2)  | 108.6    | H(59C)–C(59b)–H(59d) | 108.9    |
| H(1a1)–C(1a)–H(1a2)  | 107.6    | O(29b)–C(60b)–C(59b) | 112.9    |
| C(1a)–C(27a)–O(11a)  | 104.3(7) | O(29b)–C(60b)–H(60C) | 109.0    |
| C(1a)–C(27a)–H(27a)  | 110.9    | C(59b)–C(60b)–H(60C) | 109.0    |
| O(11a)–C(27a)–H(27a) | 110.9    | O(29b)–C(60b)–H(60d) | 109.0    |
| C(1a)–C(27a)–H(27b)  | 110.9    | C(59b)–C(60b)–H(60d) | 109.0    |
| O(11a)–C(27a)–H(27b) | 110.9    | H(60C)–C(60b)–H(60d) | 107.8    |
| H(27a)–C(27a)–H(27b) | 108.9    | H(311)–O(31)–H(312)  | 140.1(8) |
| O(11a)–C(26a)–C(245) | 108.8(7) |                      |          |

<sup>a</sup>The estimated standard deviations of the least significant digits are given in parentheses.



**Table S24.** Anisotropic Displacement Parameters ( $\text{\AA}^2$ ) for  
 $3[\text{K}(\text{18-crown-6})][\text{Fe}(\text{TMP})(\text{CN})_2]\cdot 5.1(\text{THF})\cdot 0.9\text{H}_2\text{O}^a$

| atom   | $U_{11}$   | $U_{22}$   | $U_{33}$   | $U_{23}$    | $U_{13}$    | $U_{12}$    |
|--------|------------|------------|------------|-------------|-------------|-------------|
| Fe(1)  | 0.0129(2)  | 0.0193(3)  | 0.0141(2)  | -0.0002(2)  | 0.0026(2)   | 0.0006(2)   |
| K(1)   | 0.0250(4)  | 0.0276(5)  | 0.0230(3)  | -0.0010(3)  | 0.0050(3)   | -0.0056(3)  |
| N(11)  | 0.0140(12) | 0.0201(16) | 0.0175(12) | 0.0008(11)  | 0.0033(10)  | -0.0019(10) |
| N(12)  | 0.0151(12) | 0.0233(16) | 0.0171(13) | -0.0016(11) | 0.0028(10)  | -0.0003(11) |
| N(13)  | 0.0173(13) | 0.0229(17) | 0.0162(12) | -0.0005(11) | 0.0027(10)  | 0.0020(11)  |
| N(14)  | 0.0160(12) | 0.0190(16) | 0.0156(12) | -0.0011(10) | 0.0020(10)  | 0.0016(11)  |
| N(15)  | 0.0295(16) | 0.029(2)   | 0.0327(17) | 0.0056(14)  | 0.0065(13)  | -0.0015(14) |
| N(16)  | 0.0197(14) | 0.0252(19) | 0.0385(17) | 0.0049(14)  | 0.0037(12)  | 0.0010(12)  |
| C(1A1) | 0.0133(14) | 0.0216(19) | 0.0188(15) | -0.0002(12) | 0.0025(11)  | -0.0009(12) |
| C(1A2) | 0.0153(14) | 0.0204(19) | 0.0199(15) | -0.0012(13) | 0.0022(12)  | -0.0012(12) |
| C(1A3) | 0.0152(14) | 0.0233(19) | 0.0196(15) | -0.0013(13) | 0.0034(12)  | -0.0009(12) |
| C(1A4) | 0.0194(15) | 0.0212(19) | 0.0173(15) | -0.0016(13) | 0.0019(12)  | 0.0006(13)  |
| C(1A5) | 0.0177(15) | 0.026(2)   | 0.0184(15) | -0.0009(13) | 0.0018(12)  | 0.0005(13)  |
| C(1A6) | 0.0191(15) | 0.024(2)   | 0.0178(15) | 0.0004(13)  | 0.0030(12)  | 0.0032(13)  |
| C(1A7) | 0.0167(14) | 0.0196(19) | 0.0195(15) | 0.0007(13)  | 0.0034(12)  | 0.0016(12)  |
| C(1A8) | 0.0185(15) | 0.0182(18) | 0.0175(14) | 0.0007(12)  | 0.0041(12)  | -0.0011(12) |
| C(1B1) | 0.0155(15) | 0.029(2)   | 0.0197(15) | -0.0002(13) | 0.0000(12)  | 0.0021(13)  |
| C(1B2) | 0.0145(15) | 0.031(2)   | 0.0215(16) | 0.0012(14)  | 0.0018(12)  | 0.0031(13)  |
| C(1B3) | 0.0179(15) | 0.026(2)   | 0.0201(15) | -0.0030(13) | 0.0060(12)  | -0.0008(13) |
| C(1B4) | 0.0199(16) | 0.027(2)   | 0.0187(15) | -0.0035(13) | 0.0028(12)  | 0.0038(13)  |
| C(1B5) | 0.0189(16) | 0.037(2)   | 0.0181(15) | -0.0040(14) | -0.0020(12) | 0.0053(14)  |
| C(1B6) | 0.0188(16) | 0.035(2)   | 0.0197(16) | -0.0007(14) | 0.0008(13)  | 0.0079(14)  |
| C(1B7) | 0.0214(16) | 0.024(2)   | 0.0206(15) | -0.0002(13) | 0.0054(12)  | 0.0054(13)  |
| C(1B8) | 0.0196(15) | 0.0236(19) | 0.0164(14) | -0.0010(13) | 0.0037(12)  | 0.0019(13)  |
| C(1M1) | 0.0161(15) | 0.0233(19) | 0.0201(15) | -0.0018(13) | 0.0047(12)  | 0.0000(13)  |
| C(1M2) | 0.0179(15) | 0.026(2)   | 0.0142(14) | -0.0027(13) | 0.0010(11)  | 0.0023(13)  |
| C(1M3) | 0.0170(15) | 0.0224(19) | 0.0192(15) | 0.0012(13)  | 0.0051(12)  | 0.0049(13)  |
| C(1M4) | 0.0164(14) | 0.0225(19) | 0.0155(14) | -0.0009(12) | 0.0023(11)  | -0.0013(12) |
| C(11)  | 0.0191(15) | 0.027(2)   | 0.0156(14) | 0.0015(13)  | 0.0054(12)  | 0.0011(13)  |
| C(12)  | 0.0120(14) | 0.024(2)   | 0.0228(16) | -0.0043(14) | 0.0014(12)  | 0.0016(12)  |
| C(13)  | 0.0157(15) | 0.029(2)   | 0.0185(15) | -0.0034(13) | 0.0037(12)  | 0.0004(13)  |
| C(14)  | 0.0193(16) | 0.031(2)   | 0.0233(16) | -0.0028(14) | 0.0034(13)  | 0.0008(14)  |
| C(15)  | 0.0266(19) | 0.029(2)   | 0.053(3)   | -0.0026(19) | 0.0119(17)  | 0.0004(16)  |
| C(16)  | 0.0217(17) | 0.035(2)   | 0.0300(18) | -0.0042(16) | 0.0016(14)  | 0.0071(15)  |

**Table S24.** Continued

| atom   | $U_{11}$   | $U_{22}$   | $U_{33}$   | $U_{23}$    | $U_{13}$    | $U_{12}$    |
|--------|------------|------------|------------|-------------|-------------|-------------|
| C(17)  | 0.0172(16) | 0.046(3)   | 0.0262(17) | -0.0046(16) | 0.0036(13)  | 0.0037(16)  |
| C(18)  | 0.0171(18) | 0.061(3)   | 0.061(3)   | -0.004(2)   | 0.0079(18)  | 0.0060(19)  |
| C(19)  | 0.0182(16) | 0.043(2)   | 0.0212(16) | -0.0030(15) | 0.0049(13)  | -0.0055(15) |
| C(110) | 0.0195(16) | 0.033(2)   | 0.0174(15) | -0.0017(14) | 0.0040(12)  | -0.0015(14) |
| C(111) | 0.0257(19) | 0.032(2)   | 0.045(2)   | 0.0012(18)  | 0.0102(17)  | -0.0005(16) |
| C(112) | 0.0160(14) | 0.028(2)   | 0.0160(14) | -0.0048(13) | 0.0007(11)  | 0.0051(13)  |
| C(113) | 0.0185(15) | 0.027(2)   | 0.0198(15) | -0.0014(14) | 0.0016(12)  | 0.0048(13)  |
| C(114) | 0.0307(19) | 0.032(2)   | 0.0240(17) | 0.0034(15)  | 0.0010(14)  | -0.0004(16) |
| C(115) | 0.0233(17) | 0.026(2)   | 0.0246(17) | -0.0042(14) | 0.0022(13)  | 0.0019(14)  |
| C(116) | 0.0232(17) | 0.034(2)   | 0.0208(16) | -0.0063(15) | 0.0035(13)  | 0.0035(15)  |
| C(117) | 0.046(2)   | 0.046(3)   | 0.0208(18) | -0.0075(17) | -0.0002(16) | 0.000(2)    |
| C(118) | 0.0258(17) | 0.032(2)   | 0.0184(16) | 0.0008(14)  | 0.0046(13)  | 0.0053(15)  |
| C(119) | 0.0174(15) | 0.029(2)   | 0.0217(16) | -0.0016(14) | 0.0037(12)  | 0.0045(13)  |
| C(120) | 0.037(2)   | 0.027(2)   | 0.0309(19) | -0.0008(16) | 0.0081(16)  | -0.0028(16) |
| C(121) | 0.0185(15) | 0.0239(19) | 0.0160(14) | 0.0013(13)  | 0.0033(12)  | 0.0084(13)  |
| C(122) | 0.0204(16) | 0.029(2)   | 0.0201(15) | 0.0018(14)  | 0.0056(12)  | 0.0047(14)  |
| C(123) | 0.0263(19) | 0.032(3)   | 0.059(3)   | 0.012(2)    | 0.0166(18)  | 0.0034(16)  |
| C(124) | 0.0188(16) | 0.032(2)   | 0.0224(16) | 0.0000(14)  | 0.0027(13)  | 0.0060(14)  |
| C(125) | 0.0280(18) | 0.028(2)   | 0.0186(15) | -0.0017(14) | -0.0005(13) | 0.0106(15)  |
| C(126) | 0.035(2)   | 0.034(3)   | 0.035(2)   | 0.0020(17)  | 0.0015(16)  | 0.0162(18)  |
| C(127) | 0.0320(19) | 0.020(2)   | 0.0258(17) | 0.0039(14)  | 0.0028(14)  | 0.0042(15)  |
| C(128) | 0.0201(16) | 0.028(2)   | 0.0197(15) | 0.0009(13)  | 0.0047(12)  | 0.0028(14)  |
| C(129) | 0.0272(19) | 0.031(2)   | 0.037(2)   | 0.0059(17)  | 0.0119(16)  | 0.0023(16)  |
| C(130) | 0.0143(14) | 0.0249(19) | 0.0165(14) | -0.0022(13) | 0.0020(11)  | 0.0030(13)  |
| C(131) | 0.0154(14) | 0.025(2)   | 0.0195(15) | 0.0011(13)  | 0.0030(12)  | 0.0035(13)  |
| C(132) | 0.0206(16) | 0.030(2)   | 0.0255(17) | 0.0027(15)  | 0.0016(13)  | -0.0036(14) |
| C(133) | 0.0187(15) | 0.028(2)   | 0.0196(15) | 0.0043(13)  | 0.0046(12)  | 0.0050(13)  |
| C(134) | 0.0219(16) | 0.033(2)   | 0.0177(15) | -0.0028(14) | -0.0001(12) | 0.0105(15)  |
| C(135) | 0.0293(19) | 0.042(3)   | 0.0208(17) | -0.0034(16) | -0.0023(14) | 0.0097(17)  |
| C(136) | 0.0208(16) | 0.030(2)   | 0.0242(17) | -0.0079(15) | -0.0036(13) | 0.0052(14)  |
| C(137) | 0.0184(15) | 0.023(2)   | 0.0242(16) | -0.0032(14) | 0.0018(12)  | 0.0020(13)  |
| C(138) | 0.0306(19) | 0.034(2)   | 0.034(2)   | -0.0046(17) | 0.0059(16)  | -0.0089(17) |
| C(139) | 0.0202(17) | 0.033(2)   | 0.0340(19) | 0.0010(16)  | 0.0019(14)  | 0.0016(15)  |
| C(140) | 0.0213(17) | 0.037(2)   | 0.0276(18) | 0.0002(16)  | 0.0069(14)  | -0.0007(15) |

**Table S24.** Continued

| atom   | $U_{11}$   | $U_{22}$   | $U_{33}$   | $U_{23}$    | $U_{13}$    | $U_{12}$    |
|--------|------------|------------|------------|-------------|-------------|-------------|
| C(141) | 0.0243(17) | 0.039(2)   | 0.0200(16) | 0.0029(15)  | 0.0040(13)  | 0.0043(15)  |
| C(142) | 0.0218(17) | 0.045(3)   | 0.0203(16) | -0.0026(16) | 0.0007(13)  | 0.0028(16)  |
| C(143) | 0.0203(17) | 0.044(3)   | 0.0292(18) | -0.0032(17) | 0.0037(14)  | -0.0006(16) |
| C(144) | 0.0195(16) | 0.039(2)   | 0.0315(19) | 0.0004(16)  | 0.0055(14)  | 0.0014(15)  |
| C(145) | 0.032(2)   | 0.041(3)   | 0.033(2)   | -0.0057(18) | 0.0146(16)  | -0.0047(18) |
| C(146) | 0.041(2)   | 0.034(2)   | 0.0247(18) | -0.0025(16) | 0.0119(16)  | -0.0100(18) |
| C(147) | 0.043(2)   | 0.029(2)   | 0.0266(18) | 0.0027(16)  | 0.0051(16)  | 0.0041(17)  |
| C(148) | 0.035(2)   | 0.034(2)   | 0.0255(18) | -0.0009(16) | 0.0017(15)  | 0.0023(17)  |
| C(149) | 0.0225(17) | 0.034(2)   | 0.0324(19) | 0.0001(16)  | -0.0045(14) | -0.0014(15) |
| C(150) | 0.0201(16) | 0.027(2)   | 0.0328(19) | 0.0017(15)  | -0.0006(14) | -0.0006(14) |
| O(1)   | 0.0187(12) | 0.0423(17) | 0.0238(12) | -0.0020(11) | 0.0048(9)   | 0.0004(11)  |
| O(2)   | 0.0230(12) | 0.0317(16) | 0.0252(12) | -0.0016(11) | 0.0061(10)  | -0.0016(10) |
| O(3)   | 0.0320(14) | 0.0262(15) | 0.0260(13) | 0.0016(11)  | 0.0063(10)  | -0.0037(11) |
| O(4)   | 0.0250(13) | 0.0408(18) | 0.0252(13) | -0.0014(11) | 0.0011(10)  | -0.0057(11) |
| O(5)   | 0.0249(13) | 0.0283(16) | 0.0319(13) | 0.0021(11)  | 0.0019(10)  | -0.0012(11) |
| O(6)   | 0.0189(12) | 0.0337(16) | 0.0249(12) | 0.0024(11)  | 0.0022(9)   | 0.0014(10)  |
| Fe(2)  | 0.0118(2)  | 0.0252(3)  | 0.0163(2)  | -0.0018(2)  | 0.0025(2)   | 0.0004(2)   |
| K(2)   | 0.0206(4)  | 0.0374(5)  | 0.0269(4)  | 0.0038(3)   | 0.0049(3)   | -0.0012(3)  |
| N(21)  | 0.0140(12) | 0.0254(17) | 0.0188(13) | -0.0003(11) | 0.0014(10)  | 0.0009(11)  |
| N(22)  | 0.0152(12) | 0.0196(16) | 0.0176(13) | -0.0019(11) | 0.0022(10)  | -0.0003(10) |
| N(23)  | 0.0143(13) | 0.0345(19) | 0.0182(13) | -0.0020(12) | 0.0030(10)  | 0.0026(12)  |
| N(24)  | 0.0138(12) | 0.0285(18) | 0.0200(13) | -0.0012(12) | 0.0022(10)  | 0.0032(11)  |
| N(25)  | 0.0297(17) | 0.035(2)   | 0.0393(19) | 0.0064(15)  | 0.0079(14)  | -0.0026(15) |
| N(26)  | 0.0240(15) | 0.030(2)   | 0.0332(17) | -0.0036(14) | 0.0056(13)  | -0.0022(13) |
| C(2A1) | 0.0156(14) | 0.024(2)   | 0.0208(15) | 0.0006(13)  | 0.0022(12)  | 0.0008(13)  |
| C(2A2) | 0.0167(15) | 0.0220(19) | 0.0207(15) | -0.0012(13) | 0.0006(12)  | 0.0010(13)  |
| C(2A3) | 0.0170(15) | 0.0220(19) | 0.0185(15) | -0.0015(13) | 0.0023(12)  | -0.0004(13) |
| C(2A4) | 0.0186(15) | 0.0214(19) | 0.0199(15) | -0.0003(13) | 0.0046(12)  | -0.0017(13) |
| C(2A5) | 0.0162(15) | 0.031(2)   | 0.0226(16) | 0.0010(14)  | 0.0034(12)  | 0.0040(14)  |
| C(2A6) | 0.0177(16) | 0.043(2)   | 0.0202(16) | -0.0065(15) | 0.0015(13)  | 0.0036(15)  |
| C(2A7) | 0.0184(16) | 0.034(2)   | 0.0204(16) | -0.0043(14) | 0.0028(13)  | 0.0026(14)  |
| C(2A8) | 0.0159(15) | 0.026(2)   | 0.0234(16) | 0.0003(14)  | 0.0048(12)  | 0.0010(13)  |
| C(2B1) | 0.0145(14) | 0.027(2)   | 0.0239(16) | -0.0012(14) | 0.0006(12)  | 0.0025(13)  |
| C(2B2) | 0.0181(15) | 0.029(2)   | 0.0231(16) | 0.0000(14)  | -0.0003(13) | 0.0027(14)  |

**Table S24.** Continued

| atom   | $U_{11}$   | $U_{22}$   | $U_{33}$   | $U_{23}$    | $U_{13}$    | $U_{12}$    |
|--------|------------|------------|------------|-------------|-------------|-------------|
| C(2B3) | 0.0207(16) | 0.027(2)   | 0.0193(15) | -0.0040(13) | 0.0033(12)  | 0.0016(14)  |
| C(2B4) | 0.0216(16) | 0.023(2)   | 0.0236(16) | -0.0034(14) | 0.0053(13)  | 0.0034(13)  |
| C(2B5) | 0.0175(16) | 0.049(3)   | 0.0236(17) | -0.0030(16) | 0.0010(13)  | 0.0094(16)  |
| C(2B6) | 0.0183(17) | 0.060(3)   | 0.0238(18) | -0.0085(18) | -0.0010(14) | 0.0110(17)  |
| C(2B7) | 0.0205(16) | 0.035(2)   | 0.0213(16) | -0.0013(15) | 0.0045(13)  | 0.0053(15)  |
| C(2B8) | 0.0185(16) | 0.033(2)   | 0.0201(16) | 0.0015(14)  | 0.0055(12)  | 0.0044(14)  |
| C(2M1) | 0.0170(15) | 0.0222(19) | 0.0191(15) | -0.0029(13) | 0.0007(12)  | -0.0024(13) |
| C(2M2) | 0.0162(15) | 0.024(2)   | 0.0216(15) | 0.0014(13)  | 0.0061(12)  | 0.0013(13)  |
| C(2M3) | 0.0185(16) | 0.040(2)   | 0.0209(16) | -0.0067(15) | 0.0022(13)  | 0.0038(15)  |
| C(2M4) | 0.0115(14) | 0.0233(19) | 0.0234(16) | -0.0015(13) | 0.0036(12)  | 0.0006(12)  |
| C(21)  | 0.0169(15) | 0.031(2)   | 0.0214(16) | 0.0038(14)  | 0.0037(12)  | 0.0030(14)  |
| C(22)  | 0.0157(15) | 0.029(2)   | 0.0220(16) | -0.0078(14) | 0.0049(12)  | 0.0003(14)  |
| C(23)  | 0.0191(15) | 0.030(2)   | 0.0190(15) | -0.0063(13) | -0.0018(12) | 0.0059(13)  |
| C(24)  | 0.0260(17) | 0.031(2)   | 0.0199(16) | -0.0007(14) | 0.0011(13)  | 0.0112(14)  |
| C(25)  | 0.034(2)   | 0.036(2)   | 0.0302(19) | 0.0048(17)  | 0.0049(16)  | -0.0036(17) |
| C(26)  | 0.036(2)   | 0.046(3)   | 0.0253(17) | 0.0036(16)  | 0.0046(15)  | 0.0216(18)  |
| C(27)  | 0.043(2)   | 0.062(3)   | 0.0194(17) | -0.0076(17) | -0.0042(16) | 0.032(2)    |
| C(28)  | 0.069(3)   | 0.102(5)   | 0.021(2)   | -0.010(2)   | -0.010(2)   | 0.051(3)    |
| C(29)  | 0.031(2)   | 0.062(3)   | 0.035(2)   | -0.023(2)   | -0.0134(16) | 0.0172(19)  |
| C(210) | 0.0216(17) | 0.040(2)   | 0.0306(18) | -0.0152(16) | -0.0053(14) | 0.0085(15)  |
| C(211) | 0.035(2)   | 0.050(3)   | 0.055(3)   | -0.022(2)   | 0.001(2)    | -0.012(2)   |
| C(212) | 0.0200(16) | 0.024(2)   | 0.0186(15) | 0.0000(13)  | 0.0019(12)  | 0.0030(13)  |
| C(213) | 0.0220(16) | 0.025(2)   | 0.0200(15) | -0.0014(13) | 0.0030(13)  | 0.0013(14)  |
| C(214) | 0.0228(17) | 0.028(2)   | 0.046(2)   | 0.0020(17)  | 0.0105(16)  | -0.0006(15) |
| C(215) | 0.0180(15) | 0.031(2)   | 0.0242(16) | -0.0007(14) | 0.0033(13)  | 0.0028(14)  |
| C(216) | 0.0270(18) | 0.032(2)   | 0.0277(18) | 0.0038(15)  | 0.0010(14)  | 0.0066(16)  |
| C(217) | 0.033(2)   | 0.033(3)   | 0.053(3)   | 0.007(2)    | 0.0044(19)  | 0.0122(18)  |
| C(218) | 0.0301(19) | 0.027(2)   | 0.041(2)   | 0.0098(17)  | 0.0050(16)  | 0.0024(16)  |
| C(219) | 0.0209(17) | 0.033(2)   | 0.035(2)   | 0.0100(16)  | 0.0039(14)  | 0.0031(15)  |
| C(220) | 0.027(2)   | 0.040(3)   | 0.057(3)   | 0.016(2)    | 0.0147(19)  | 0.0000(18)  |
| C(221) | 0.0144(15) | 0.056(3)   | 0.0205(16) | -0.0104(17) | -0.0003(13) | 0.0064(16)  |
| C(222) | 0.0178(16) | 0.052(3)   | 0.0313(19) | -0.0136(18) | 0.0000(14)  | 0.0102(17)  |
| C(223) | 0.033(2)   | 0.048(3)   | 0.042(2)   | -0.008(2)   | 0.0018(18)  | 0.0053(19)  |
| C(224) | 0.0252(19) | 0.056(3)   | 0.040(2)   | -0.019(2)   | -0.0028(17) | 0.0063(19)  |

**Table S24.** Continued

| atom   | $U_{11}$   | $U_{22}$   | $U_{33}$   | $U_{23}$    | $U_{13}$    | $U_{12}$    |
|--------|------------|------------|------------|-------------|-------------|-------------|
| C(225) | 0.0243(19) | 0.078(4)   | 0.029(2)   | -0.025(2)   | 0.0000(16)  | 0.006(2)    |
| C(226) | 0.049(3)   | 0.099(5)   | 0.037(3)   | -0.034(3)   | -0.004(2)   | -0.002(3)   |
| C(227) | 0.0230(18) | 0.074(4)   | 0.0221(18) | -0.010(2)   | 0.0027(14)  | 0.007(2)    |
| C(228) | 0.0205(17) | 0.058(3)   | 0.0216(17) | -0.0062(17) | 0.0027(14)  | 0.0082(17)  |
| C(229) | 0.039(2)   | 0.066(4)   | 0.027(2)   | 0.000(2)    | 0.0035(17)  | 0.002(2)    |
| C(230) | 0.0110(14) | 0.026(2)   | 0.0199(15) | 0.0016(13)  | 0.0032(11)  | 0.0018(12)  |
| C(231) | 0.0202(16) | 0.024(2)   | 0.0182(15) | 0.0026(13)  | 0.0015(12)  | 0.0015(13)  |
| C(232) | 0.0306(19) | 0.029(2)   | 0.034(2)   | -0.0014(16) | 0.0089(15)  | -0.0052(16) |
| C(233) | 0.0257(17) | 0.024(2)   | 0.0231(16) | 0.0020(14)  | 0.0054(13)  | 0.0073(14)  |
| C(234) | 0.0149(15) | 0.037(2)   | 0.0250(17) | 0.0035(15)  | 0.0048(13)  | 0.0071(14)  |
| C(235) | 0.0192(18) | 0.051(3)   | 0.059(3)   | -0.001(2)   | 0.0111(18)  | 0.0089(18)  |
| C(236) | 0.0147(15) | 0.031(2)   | 0.0251(16) | 0.0054(14)  | 0.0041(12)  | -0.0017(13) |
| C(237) | 0.0146(15) | 0.024(2)   | 0.0234(16) | 0.0030(13)  | 0.0023(12)  | 0.0003(13)  |
| C(238) | 0.0231(18) | 0.026(2)   | 0.059(3)   | -0.0035(19) | 0.0085(17)  | -0.0030(15) |
| C(239) | 0.0284(19) | 0.042(3)   | 0.037(2)   | -0.0066(18) | 0.0044(16)  | -0.0006(17) |
| C(240) | 0.0307(19) | 0.035(2)   | 0.033(2)   | -0.0066(17) | 0.0086(16)  | -0.0029(17) |
| C(241) | 0.0307(19) | 0.034(2)   | 0.0310(19) | 0.0001(16)  | 0.0127(15)  | 0.0026(16)  |
| C(242) | 0.0311(19) | 0.038(2)   | 0.0300(19) | 0.0035(17)  | 0.0127(15)  | 0.0046(17)  |
| C(243) | 0.0229(19) | 0.055(3)   | 0.046(2)   | 0.010(2)    | 0.0011(17)  | -0.0073(19) |
| C(244) | 0.0248(19) | 0.051(3)   | 0.042(2)   | 0.008(2)    | -0.0009(17) | 0.0012(18)  |
| C(245) | 0.041(3)   | 0.072(4)   | 0.036(2)   | 0.005(2)    | -0.0025(19) | 0.010(2)    |
| C(248) | 0.0268(19) | 0.044(3)   | 0.049(2)   | -0.010(2)   | 0.0183(18)  | -0.0061(18) |
| C(249) | 0.0235(19) | 0.061(3)   | 0.048(2)   | -0.012(2)   | 0.0083(17)  | -0.0014(19) |
| O(7)   | 0.0256(13) | 0.0333(17) | 0.0344(14) | -0.0006(12) | 0.0118(11)  | 0.0001(11)  |
| O(8)   | 0.0261(13) | 0.0311(16) | 0.0356(14) | -0.0057(12) | 0.0103(11)  | -0.0026(11) |
| O(9)   | 0.0274(13) | 0.0378(18) | 0.0344(14) | 0.0061(12)  | 0.0059(11)  | 0.0020(12)  |
| O(10)  | 0.0251(14) | 0.079(3)   | 0.0327(15) | 0.0051(16)  | -0.0051(12) | 0.0080(15)  |
| C(1A)  | 0.029(3)   | 0.037(4)   | 0.033(3)   | 0.001(3)    | 0.008(2)    | -0.003(3)   |
| C(27A) | 0.045(5)   | 0.054(4)   | 0.045(3)   | 0.016(3)    | 0.017(4)    | 0.001(4)    |
| C(26A) | 0.055(4)   | 0.046(5)   | 0.032(4)   | 0.004(3)    | -0.011(3)   | -0.010(3)   |
| O(11A) | 0.037(2)   | 0.043(3)   | 0.039(2)   | 0.0069(18)  | 0.0026(17)  | -0.0008(19) |
| O(12A) | 0.025(3)   | 0.027(4)   | 0.045(3)   | -0.005(3)   | 0.006(2)    | 0.002(2)    |
| C(1B)  | 0.043(7)   | 0.065(9)   | 0.047(7)   | -0.003(6)   | 0.013(6)    | -0.009(6)   |
| C(27B) | 0.045(5)   | 0.054(4)   | 0.045(3)   | 0.016(3)    | 0.017(4)    | 0.001(4)    |

**Table S24.** Continued

| atom   | $U_{11}$   | $U_{22}$   | $U_{33}$   | $U_{23}$    | $U_{13}$   | $U_{12}$    |
|--------|------------|------------|------------|-------------|------------|-------------|
| C(26B) | 0.055(4)   | 0.046(5)   | 0.032(4)   | 0.004(3)    | -0.011(3)  | -0.010(3)   |
| O(11B) | 0.037(2)   | 0.043(3)   | 0.039(2)   | 0.0069(18)  | 0.0026(17) | -0.0008(19) |
| O(12B) | 0.035(10)  | 0.076(17)  | 0.032(6)   | -0.006(10)  | 0.012(6)   | -0.017(9)   |
| Fe(3)  | 0.0130(2)  | 0.0239(3)  | 0.0156(2)  | -0.0002(2)  | 0.0033(2)  | -0.0018(2)  |
| K(3)   | 0.0272(4)  | 0.0304(5)  | 0.0308(4)  | 0.0018(3)   | 0.0068(3)  | 0.0031(3)   |
| N(31)  | 0.0149(13) | 0.0266(17) | 0.0189(13) | 0.0004(11)  | 0.0031(10) | -0.0026(11) |
| N(32)  | 0.0166(13) | 0.0237(17) | 0.0167(13) | -0.0003(11) | 0.0039(10) | -0.0014(11) |
| N(33)  | 0.0161(12) | 0.0229(16) | 0.0174(13) | 0.0010(11)  | 0.0050(10) | -0.0013(11) |
| N(34)  | 0.0141(12) | 0.0257(17) | 0.0188(13) | -0.0010(11) | 0.0038(10) | -0.0019(11) |
| N(35)  | 0.0328(18) | 0.037(2)   | 0.0389(19) | 0.0014(15)  | 0.0072(14) | -0.0100(16) |
| N(36)  | 0.0258(16) | 0.031(2)   | 0.0340(17) | 0.0002(14)  | 0.0087(13) | -0.0036(14) |
| C(3A1) | 0.0142(15) | 0.031(2)   | 0.0235(16) | 0.0014(14)  | 0.0027(12) | -0.0033(13) |
| C(3A2) | 0.0163(15) | 0.029(2)   | 0.0200(15) | -0.0003(14) | 0.0020(12) | -0.0017(13) |
| C(3A3) | 0.0210(16) | 0.024(2)   | 0.0186(15) | -0.0025(13) | 0.0031(12) | -0.0036(13) |
| C(3A4) | 0.0193(15) | 0.0216(19) | 0.0201(15) | -0.0001(13) | 0.0042(12) | -0.0019(13) |
| C(3A5) | 0.0149(14) | 0.028(2)   | 0.0186(15) | 0.0037(13)  | 0.0046(12) | 0.0005(13)  |
| C(3A6) | 0.0173(15) | 0.025(2)   | 0.0175(15) | 0.0009(13)  | 0.0020(12) | -0.0016(13) |
| C(3A7) | 0.0165(15) | 0.025(2)   | 0.0194(15) | -0.0013(13) | 0.0038(12) | 0.0000(13)  |
| C(3A8) | 0.0130(14) | 0.028(2)   | 0.0210(15) | 0.0002(13)  | 0.0049(12) | -0.0035(13) |
| C(3B1) | 0.0165(16) | 0.044(3)   | 0.0240(17) | 0.0008(16)  | 0.0009(13) | 0.0008(15)  |
| C(3B2) | 0.0206(17) | 0.044(3)   | 0.0201(16) | 0.0017(15)  | 0.0013(13) | 0.0007(16)  |
| C(3B3) | 0.0256(17) | 0.027(2)   | 0.0178(15) | -0.0035(14) | 0.0040(13) | -0.0019(14) |
| C(3B4) | 0.0245(17) | 0.028(2)   | 0.0200(16) | -0.0051(14) | 0.0045(13) | -0.0001(14) |
| C(3B5) | 0.0178(15) | 0.031(2)   | 0.0184(15) | 0.0024(14)  | 0.0028(12) | 0.0004(14)  |
| C(3B6) | 0.0158(15) | 0.034(2)   | 0.0198(15) | 0.0013(14)  | 0.0029(12) | -0.0001(14) |
| C(3B7) | 0.0208(16) | 0.029(2)   | 0.0197(15) | -0.0027(14) | 0.0065(13) | -0.0009(14) |
| C(3B8) | 0.0160(15) | 0.032(2)   | 0.0237(16) | -0.0028(14) | 0.0053(13) | -0.0014(14) |
| C(3M1) | 0.0185(15) | 0.027(2)   | 0.0172(15) | -0.0015(13) | 0.0017(12) | -0.0049(13) |
| C(3M2) | 0.0172(15) | 0.024(2)   | 0.0213(15) | 0.0015(13)  | 0.0053(12) | 0.0003(13)  |
| C(3M3) | 0.0170(15) | 0.026(2)   | 0.0170(15) | -0.0007(13) | 0.0017(12) | -0.0033(13) |
| C(3M4) | 0.0137(14) | 0.025(2)   | 0.0240(16) | 0.0002(13)  | 0.0052(12) | -0.0037(13) |
| C(31)  | 0.0196(16) | 0.031(2)   | 0.0207(16) | 0.0015(14)  | 0.0041(13) | -0.0002(14) |
| C(32)  | 0.0154(15) | 0.029(2)   | 0.0198(15) | -0.0027(14) | 0.0046(12) | 0.0014(13)  |
| C(33)  | 0.0232(10) | 0.0255(11) | 0.0229(10) | -0.0009(8)  | 0.0022(8)  | 0.0015(8)   |

**Table S24.** Continued

| atom   | $U_{11}$   | $U_{22}$   | $U_{33}$   | $U_{23}$    | $U_{13}$    | $U_{12}$    |
|--------|------------|------------|------------|-------------|-------------|-------------|
| C(34)  | 0.0285(11) | 0.0301(11) | 0.0279(10) | 0.0015(9)   | 0.0049(8)   | 0.0024(8)   |
| C(35)  | 0.0372(16) | 0.0394(18) | 0.0394(16) | 0.0051(14)  | 0.0082(13)  | -0.0034(14) |
| C(36)  | 0.0369(12) | 0.0393(12) | 0.0349(11) | 0.0018(9)   | 0.0065(9)   | 0.0049(9)   |
| C(37)  | 0.0389(12) | 0.0427(13) | 0.0377(12) | -0.0019(9)  | 0.0037(9)   | 0.0069(9)   |
| C(38)  | 0.058(2)   | 0.070(2)   | 0.0499(18) | -0.0009(16) | 0.0033(16)  | 0.0151(17)  |
| C(39)  | 0.0383(12) | 0.0422(13) | 0.0389(12) | -0.0054(9)  | 0.0022(9)   | 0.0034(9)   |
| C(310) | 0.0303(11) | 0.0341(12) | 0.0330(11) | -0.0038(9)  | 0.0016(9)   | 0.0009(9)   |
| C(311) | 0.039(2)   | 0.053(3)   | 0.067(3)   | -0.023(3)   | 0.002(2)    | -0.020(2)   |
| C(312) | 0.0206(16) | 0.024(2)   | 0.0173(14) | 0.0009(13)  | 0.0051(12)  | 0.0036(13)  |
| C(313) | 0.0216(16) | 0.024(2)   | 0.0219(16) | 0.0005(13)  | 0.0058(13)  | 0.0005(14)  |
| C(314) | 0.0259(19) | 0.028(2)   | 0.051(2)   | -0.0029(18) | 0.0117(17)  | 0.0000(16)  |
| C(315) | 0.0200(16) | 0.032(2)   | 0.0228(16) | 0.0002(14)  | 0.0048(13)  | 0.0048(14)  |
| C(316) | 0.0269(17) | 0.029(2)   | 0.0184(15) | 0.0022(14)  | 0.0011(13)  | 0.0068(15)  |
| C(317) | 0.036(2)   | 0.031(2)   | 0.035(2)   | -0.0030(17) | 0.0013(16)  | 0.0114(17)  |
| C(318) | 0.0301(18) | 0.026(2)   | 0.0232(17) | 0.0011(14)  | 0.0045(14)  | 0.0001(15)  |
| C(319) | 0.0239(17) | 0.029(2)   | 0.0195(15) | 0.0010(14)  | 0.0053(13)  | -0.0001(14) |
| C(320) | 0.0265(19) | 0.030(2)   | 0.045(2)   | -0.0042(18) | 0.0111(16)  | -0.0037(16) |
| C(321) | 0.0135(14) | 0.033(2)   | 0.0204(16) | -0.0055(14) | 0.0015(12)  | 0.0022(13)  |
| C(322) | 0.0156(15) | 0.033(2)   | 0.0249(17) | -0.0024(15) | 0.0016(13)  | 0.0033(14)  |
| C(323) | 0.0228(17) | 0.031(2)   | 0.0293(18) | -0.0034(15) | 0.0012(14)  | -0.0004(15) |
| C(324) | 0.0204(17) | 0.034(2)   | 0.0316(19) | -0.0078(16) | -0.0004(14) | 0.0020(15)  |
| C(325) | 0.0184(16) | 0.043(3)   | 0.0238(17) | -0.0089(16) | -0.0006(13) | 0.0063(15)  |
| C(326) | 0.035(2)   | 0.059(3)   | 0.0268(19) | -0.0158(19) | -0.0057(16) | 0.005(2)    |
| C(327) | 0.0230(17) | 0.040(2)   | 0.0196(16) | -0.0003(15) | 0.0028(13)  | 0.0097(16)  |
| C(328) | 0.0156(15) | 0.038(2)   | 0.0212(16) | -0.0046(15) | 0.0025(12)  | 0.0055(14)  |
| C(329) | 0.0312(19) | 0.040(3)   | 0.0247(18) | 0.0028(16)  | 0.0073(15)  | 0.0056(17)  |
| C(330) | 0.0132(14) | 0.032(2)   | 0.0196(15) | 0.0007(14)  | 0.0026(12)  | 0.0008(13)  |
| C(331) | 0.0248(18) | 0.030(2)   | 0.0336(19) | 0.0020(16)  | 0.0051(15)  | -0.0003(15) |
| C(332) | 0.036(2)   | 0.034(3)   | 0.080(4)   | 0.005(2)    | 0.011(2)    | -0.0067(19) |
| C(333) | 0.0286(19) | 0.032(2)   | 0.041(2)   | 0.0008(18)  | 0.0043(16)  | 0.0083(16)  |
| C(334) | 0.0162(16) | 0.045(3)   | 0.0287(18) | 0.0016(17)  | 0.0020(13)  | 0.0065(15)  |
| C(335) | 0.0206(19) | 0.060(3)   | 0.064(3)   | 0.002(2)    | 0.0067(19)  | 0.012(2)    |
| C(336) | 0.0152(15) | 0.038(2)   | 0.0229(16) | 0.0024(15)  | 0.0009(12)  | -0.0018(14) |
| C(337) | 0.0156(15) | 0.031(2)   | 0.0197(15) | 0.0003(14)  | 0.0027(12)  | -0.0007(13) |

**Table S24.** Continued

| atom   | $U_{11}$   | $U_{22}$  | $U_{33}$   | $U_{23}$    | $U_{13}$   | $U_{12}$    |
|--------|------------|-----------|------------|-------------|------------|-------------|
| C(338) | 0.0253(18) | 0.034(2)  | 0.045(2)   | 0.0006(18)  | 0.0097(16) | -0.0021(16) |
| O(13)  | 0.0202(15) | 0.033(2)  | 0.0324(17) | -0.0024(14) | 0.0080(13) | -0.0003(14) |
| O(14)  | 0.0256(17) | 0.044(2)  | 0.0273(17) | 0.0007(15)  | 0.0030(13) | 0.0037(15)  |
| O(15)  | 0.030(2)   | 0.070(3)  | 0.031(2)   | 0.008(2)    | 0.0018(18) | 0.018(2)    |
| O(17)  | 0.046(2)   | 0.032(2)  | 0.048(2)   | -0.0098(17) | 0.0261(18) | -0.0095(17) |
| O(18)  | 0.0165(15) | 0.038(2)  | 0.0245(17) | 0.0065(15)  | 0.0014(13) | -0.0013(13) |
| C(339) | 0.024(3)   | 0.042(4)  | 0.028(3)   | 0.001(2)    | 0.008(2)   | 0.002(2)    |
| C(340) | 0.024(2)   | 0.048(4)  | 0.026(2)   | 0.001(2)    | 0.0089(19) | 0.001(2)    |
| C(341) | 0.014(4)   | 0.073(7)  | 0.035(4)   | -0.003(4)   | 0.005(3)   | -0.005(4)   |
| C(342) | 0.021(2)   | 0.074(5)  | 0.040(3)   | -0.004(3)   | -0.002(2)  | 0.010(3)    |
| C(343) | 0.054(5)   | 0.076(6)  | 0.034(4)   | 0.011(3)    | -0.005(3)  | 0.005(4)    |
| C(344) | 0.058(5)   | 0.061(5)  | 0.045(3)   | 0.019(3)    | 0.024(4)   | 0.019(4)    |
| C(2A)  | 0.043(4)   | 0.067(5)  | 0.036(4)   | -0.015(4)   | 0.029(4)   | -0.014(3)   |
| O(16A) | 0.035(3)   | 0.038(3)  | 0.042(3)   | 0.010(2)    | 0.016(2)   | 0.003(2)    |
| C(2B)  | 0.043(4)   | 0.067(5)  | 0.036(4)   | -0.015(4)   | 0.029(4)   | -0.014(3)   |
| O(16B) | 0.050(12)  | 0.053(13) | 0.038(11)  | 0.000(8)    | 0.001(8)   | -0.009(8)   |
| C(345) | 0.043(3)   | 0.067(5)  | 0.046(3)   | -0.015(3)   | 0.012(3)   | 0.000(3)    |
| C(346) | 0.021(2)   | 0.036(5)  | 0.038(4)   | 0.001(2)    | 0.010(2)   | -0.006(2)   |
| C(347) | 0.014(2)   | 0.056(4)  | 0.039(3)   | 0.007(3)    | 0.0062(19) | 0.002(2)    |
| C(348) | 0.023(2)   | 0.042(4)  | 0.026(3)   | 0.001(2)    | -0.003(2)  | -0.003(2)   |
| C(349) | 0.027(4)   | 0.041(3)  | 0.029(3)   | 0.000(2)    | 0.002(3)   | -0.003(3)   |
| O(19)  | 0.027(7)   | 0.040(9)  | 0.039(8)   | -0.011(6)   | 0.008(6)   | -0.003(6)   |
| O(20)  | 0.016(12)  | 0.041(13) | 0.068(17)  | 0.003(10)   | 0.017(9)   | 0.001(9)    |
| O(21)  | 0.067(14)  | 0.043(13) | 0.061(16)  | -0.006(12)  | 0.004(13)  | 0.002(10)   |
| O(22)  | 0.036(6)   | 0.044(8)  | 0.052(7)   | 0.001(6)    | 0.010(6)   | 0.006(6)    |
| O(23)  | 0.042(9)   | 0.051(11) | 0.043(9)   | 0.000(8)    | 0.013(7)   | 0.006(7)    |
| O(24)  | 0.023(7)   | 0.061(11) | 0.045(9)   | -0.002(8)   | 0.008(6)   | -0.004(7)   |
| C(350) | 0.044(9)   | 0.053(10) | 0.054(10)  | -0.001(8)   | 0.012(8)   | -0.004(8)   |
| C(351) | 0.042(9)   | 0.037(9)  | 0.053(9)   | 0.003(8)    | 0.004(7)   | 0.000(8)    |
| C(352) | 0.052(10)  | 0.062(11) | 0.070(11)  | -0.003(9)   | 0.002(8)   | -0.005(8)   |
| C(353) | 0.054(10)  | 0.056(10) | 0.059(10)  | -0.013(8)   | 0.004(8)   | 0.002(8)    |
| C(354) | 0.040(9)   | 0.040(9)  | 0.033(9)   | 0.015(7)    | -0.007(8)  | 0.002(8)    |
| C(355) | 0.058(5)   | 0.061(5)  | 0.045(3)   | 0.019(3)    | 0.024(4)   | 0.019(4)    |
| C(356) | 0.043(3)   | 0.067(5)  | 0.046(3)   | -0.015(3)   | 0.012(3)   | 0.000(3)    |



**Table S24.** Continued

| atom   | $U_{11}$   | $U_{22}$   | $U_{33}$   | $U_{23}$    | $U_{13}$    | $U_{12}$    |
|--------|------------|------------|------------|-------------|-------------|-------------|
| C(357) | 0.021(2)   | 0.036(5)   | 0.038(4)   | 0.001(2)    | 0.010(2)    | -0.006(2)   |
| C(358) | 0.034(11)  | 0.019(12)  | 0.067(16)  | -0.007(10)  | 0.004(10)   | 0.002(8)    |
| C(359) | 0.047(15)  | 0.038(15)  | 0.040(16)  | -0.006(12)  | -0.004(13)  | 0.012(11)   |
| C(360) | 0.027(4)   | 0.041(3)   | 0.029(3)   | 0.000(2)    | 0.002(3)    | -0.003(3)   |
| C(361) | 0.052(11)  | 0.064(12)  | 0.039(10)  | 0.005(8)    | 0.009(9)    | -0.006(9)   |
| O(26)  | 0.070(4)   | 0.073(4)   | 0.070(4)   | 0.002(3)    | -0.016(3)   | -0.019(3)   |
| C(45)  | 0.016(2)   | 0.017(2)   | 0.021(2)   | -0.0005(17) | -0.0040(16) | 0.0011(17)  |
| C(46)  | 0.076(5)   | 0.045(4)   | 0.044(3)   | -0.008(3)   | -0.013(3)   | -0.008(3)   |
| C(47)  | 0.042(3)   | 0.041(4)   | 0.068(4)   | -0.021(3)   | 0.019(3)    | -0.005(3)   |
| C(48)  | 0.033(3)   | 0.051(4)   | 0.044(3)   | 0.005(3)    | 0.003(3)    | 0.001(3)    |
| O(27)  | 0.0450(18) | 0.039(2)   | 0.0457(18) | 0.0067(14)  | 0.0004(14)  | -0.0037(14) |
| C(49)  | 0.073(4)   | 0.054(4)   | 0.043(3)   | -0.007(2)   | 0.009(2)    | -0.013(3)   |
| C(50)  | 0.069(3)   | 0.035(3)   | 0.044(3)   | -0.002(2)   | 0.006(2)    | -0.007(2)   |
| C(51)  | 0.042(2)   | 0.040(3)   | 0.042(2)   | 0.001(2)    | -0.0038(19) | -0.002(2)   |
| C(52)  | 0.041(2)   | 0.035(3)   | 0.033(2)   | 0.0013(18)  | -0.0076(17) | -0.0012(18) |
| O(28)  | 0.101(5)   | 0.104(6)   | 0.056(4)   | -0.003(4)   | -0.012(3)   | -0.039(4)   |
| C(53)  | 0.109(6)   | 0.029(3)   | 0.029(3)   | 0.003(3)    | -0.026(3)   | -0.017(4)   |
| C(54)  | 0.107(6)   | 0.038(4)   | 0.044(3)   | 0.016(3)    | -0.010(4)   | -0.022(4)   |
| C(55)  | 0.109(5)   | 0.011(3)   | 0.051(4)   | 0.009(2)    | -0.051(4)   | -0.003(3)   |
| C(56)  | 0.058(4)   | 0.038(4)   | 0.048(3)   | -0.009(3)   | -0.017(3)   | 0.007(3)    |
| O(30)  | 0.084(4)   | 0.076(4)   | 0.081(4)   | -0.004(3)   | 0.010(3)    | -0.014(3)   |
| C(61)  | 0.032(2)   | 0.045(3)   | 0.027(2)   | -0.010(2)   | 0.0013(19)  | 0.005(2)    |
| C(62)  | 0.050(3)   | 0.046(3)   | 0.041(3)   | -0.008(2)   | 0.001(2)    | -0.005(3)   |
| C(63)  | 0.061(4)   | 0.055(4)   | 0.035(3)   | -0.016(2)   | 0.008(3)    | 0.007(3)    |
| C(64)  | 0.046(3)   | 0.023(3)   | 0.026(2)   | -0.0107(18) | 0.001(2)    | -0.012(2)   |
| O(25)  | 0.0311(14) | 0.0387(18) | 0.0348(15) | -0.0003(12) | 0.0035(11)  | 0.0104(12)  |
| C(41)  | 0.0241(18) | 0.032(2)   | 0.034(2)   | -0.0024(16) | 0.0017(15)  | 0.0014(15)  |
| C(42)  | 0.037(2)   | 0.033(2)   | 0.033(2)   | -0.0005(17) | 0.0016(16)  | 0.0085(17)  |
| C(43)  | 0.056(3)   | 0.030(3)   | 0.032(2)   | -0.0034(17) | 0.0030(19)  | 0.006(2)    |
| C(44)  | 0.037(2)   | 0.048(3)   | 0.031(2)   | 0.0022(18)  | 0.0039(17)  | 0.0101(19)  |
| O(29A) | 0.088(4)   | 0.059(4)   | 0.069(4)   | -0.012(3)   | 0.018(3)    | -0.011(3)   |
| C(57A) | 0.067(5)   | 0.051(4)   | 0.061(4)   | -0.005(3)   | 0.003(4)    | -0.007(4)   |
| C(58A) | 0.045(4)   | 0.056(4)   | 0.056(3)   | -0.007(3)   | 0.007(3)    | 0.003(3)    |
| C(59A) | 0.048(4)   | 0.057(4)   | 0.072(4)   | -0.006(4)   | 0.010(4)    | -0.012(3)   |

**Table S24.** Continued

| atom   | $U_{11}$  | $U_{22}$ | $U_{33}$ | $U_{23}$  | $U_{13}$  | $U_{12}$  |
|--------|-----------|----------|----------|-----------|-----------|-----------|
| C(60A) | 0.077(5)  | 0.052(5) | 0.075(4) | -0.015(4) | 0.006(4)  | -0.007(4) |
| O(29B) | 0.088(4)  | 0.059(4) | 0.069(4) | -0.012(3) | 0.018(3)  | -0.011(3) |
| C(57B) | 0.067(5)  | 0.051(4) | 0.061(4) | -0.005(3) | 0.003(4)  | -0.007(4) |
| C(58B) | 0.045(4)  | 0.056(4) | 0.056(3) | -0.007(3) | 0.007(3)  | 0.003(3)  |
| C(59B) | 0.048(4)  | 0.057(4) | 0.072(4) | -0.006(4) | 0.010(4)  | -0.012(3) |
| C(60B) | 0.077(5)  | 0.052(5) | 0.075(4) | -0.015(4) | 0.006(4)  | -0.007(4) |
| O(31)  | 0.050(3)  | 0.031(3) | 0.042(3) | -0.001(2) | 0.003(2)  | -0.005(2) |
| O(32)  | 0.093(10) | 0.045(8) | 0.045(7) | 0.004(5)  | -0.006(6) | -0.011(7) |

<sup>a</sup>The estimated standard deviations of the least significant digits are given in parentheses. The anisotropic displacement factor exponent takes the form:  $-2 \pi [\text{h}^2 U_{11} + \dots + 2 \text{h k a}^* \text{b}^* U_{12}]$ .

**Table S25.** Hydrogen Atom Coordinates and Equivalent Isotropic Displacement Parameters ( $\text{\AA}^2$ ) for  $3[\text{K}(\text{18-crown-6})][\text{Fe}(\text{TMP})(\text{CN})_2]\cdot 5.1(\text{THF})\cdot 0.9\text{H}_2\text{O}^a$

| atom   | <i>x</i> | <i>y</i> | <i>z</i> | <i>U</i> (eq) |
|--------|----------|----------|----------|---------------|
| H(1BA) | 0.6708   | 0.6202   | 0.3907   | 0.026         |
| H(1BF) | 0.7286   | 0.6004   | 0.3502   | 0.027         |
| H(1BE) | 0.6751   | 0.5953   | 0.2345   | 0.025         |
| H(1BD) | 0.5793   | 0.5876   | 0.2017   | 0.026         |
| H(1BG) | 0.3655   | 0.6754   | 0.2110   | 0.030         |
| H(1BH) | 0.3304   | 0.7540   | 0.2458   | 0.030         |
| H(1BC) | 0.3990   | 0.8079   | 0.3581   | 0.026         |
| H(1BB) | 0.4745   | 0.7570   | 0.3959   | 0.024         |
| H(15I) | 0.6790   | 0.5003   | 0.3076   | 0.053         |
| H(15J) | 0.7353   | 0.4529   | 0.3121   | 0.053         |
| H(15K) | 0.6994   | 0.4638   | 0.2800   | 0.053         |
| H(16A) | 0.8269   | 0.4888   | 0.2961   | 0.035         |
| H(18A) | 0.9235   | 0.5259   | 0.2949   | 0.069         |
| H(18B) | 0.9373   | 0.6029   | 0.3005   | 0.069         |
| H(18C) | 0.9217   | 0.5756   | 0.2678   | 0.069         |
| H(19A) | 0.8511   | 0.6827   | 0.2813   | 0.033         |
| H(11C) | 0.7752   | 0.7611   | 0.2812   | 0.051         |
| H(11D) | 0.7210   | 0.7414   | 0.2975   | 0.051         |
| H(11E) | 0.7160   | 0.7325   | 0.2628   | 0.051         |
| H(11F) | 0.4697   | 0.4999   | 0.2300   | 0.044         |
| H(11G) | 0.4283   | 0.4525   | 0.2081   | 0.044         |
| H(11H) | 0.3998   | 0.5089   | 0.2259   | 0.044         |
| H(11A) | 0.4000   | 0.4837   | 0.1586   | 0.030         |
| H(11I) | 0.4186   | 0.5572   | 0.0951   | 0.057         |
| H(11J) | 0.3549   | 0.5787   | 0.1018   | 0.057         |
| H(11K) | 0.3775   | 0.5044   | 0.1081   | 0.057         |
| H(11B) | 0.4406   | 0.6632   | 0.1292   | 0.030         |
| H(12C) | 0.4791   | 0.7482   | 0.1611   | 0.047         |
| H(12D) | 0.5322   | 0.7167   | 0.1831   | 0.047         |
| H(12E) | 0.4743   | 0.7416   | 0.1951   | 0.047         |
| H(12I) | 0.2416   | 0.7415   | 0.3191   | 0.057         |
| H(12J) | 0.3088   | 0.7240   | 0.3308   | 0.057         |
| H(12K) | 0.2814   | 0.7073   | 0.2977   | 0.057         |
| H(12B) | 0.2198   | 0.8500   | 0.3048   | 0.029         |

**Table S25.** Continued

| atom   | <i>x</i>   | <i>y</i>   | <i>z</i>    | <i>U</i> (eq) |
|--------|------------|------------|-------------|---------------|
| H(12L) | 0.1907     | 0.9606     | 0.2941      | 0.053         |
| H(12M) | 0.2183     | 0.9868     | 0.2664      | 0.053         |
| H(12N) | 0.2425     | 1.0143     | 0.2984      | 0.053         |
| H(12A) | 0.3394     | 0.9737     | 0.2799      | 0.031         |
| H(12F) | 0.4343     | 0.9398     | 0.2751      | 0.047         |
| H(12G) | 0.4474     | 0.8623     | 0.2726      | 0.047         |
| H(12H) | 0.4593     | 0.8984     | 0.3038      | 0.047         |
| H(13F) | 0.4781     | 0.5608     | 0.4189      | 0.038         |
| H(13G) | 0.5081     | 0.5666     | 0.3899      | 0.038         |
| H(13H) | 0.4595     | 0.6193     | 0.3960      | 0.038         |
| H(13A) | 0.5302     | 0.6030     | 0.4622      | 0.026         |
| H(13C) | 0.5787     | 0.6403     | 0.5078      | 0.047         |
| H(13D) | 0.6052     | 0.7137     | 0.5087      | 0.047         |
| H(13E) | 0.6471     | 0.6513     | 0.5064      | 0.047         |
| H(13B) | 0.6536     | 0.7452     | 0.4625      | 0.031         |
| H(13I) | 0.6657     | 0.8040     | 0.4195      | 0.049         |
| H(13J) | 0.6226     | 0.7901     | 0.3896      | 0.049         |
| H(13K) | 0.6807     | 0.7464     | 0.3980      | 0.049         |
| H(13L) | 0.6132     | 0.3162     | 0.3205      | 0.035         |
| H(13M) | 0.6532     | 0.3811     | 0.3214      | 0.035         |
| H(14A) | 0.5702     | 0.4436     | 0.2998      | 0.034         |
| H(14B) | 0.5827     | 0.3831     | 0.2790      | 0.034         |
| H(43C) | 0.4854     | 0.3803     | 0.2569      | 0.033         |
| H(43D) | 0.4636     | 0.4375     | 0.2769      | 0.033         |
| H(70A) | 0.3858     | 0.3607     | 0.2593      | 0.035         |
| H(70B) | 0.4227     | 0.3031     | 0.2777      | 0.035         |
| H(43A) | 0.3553     | 0.2859     | 0.3122      | 0.037         |
| H(43B) | 0.3123     | 0.3319     | 0.2902      | 0.037         |
| H(93A) | 0.3035     | 0.4065     | 0.3287      | 0.036         |
| H(93B) | 0.2836     | 0.3338     | 0.3373      | 0.036         |
| H(15E) | 0.3011(13) | 0.3514(8)  | 0.38658(11) | 0.041         |
| H(15F) | 0.3312(4)  | 0.4320(17) | 0.38431(9)  | 0.041         |
| H(15C) | 0.3744     | 0.3727     | 0.4285      | 0.039         |
| H(15D) | 0.3986     | 0.3153     | 0.4095      | 0.039         |

**Table S25.** Continued

| atom   | <i>x</i> | <i>y</i> | <i>z</i> | <i>U</i> (eq) |
|--------|----------|----------|----------|---------------|
| H(94A) | 0.4987   | 0.3338   | 0.4233   | 0.039         |
| H(94B) | 0.4787   | 0.3812   | 0.4479   | 0.039         |
| H(14M) | 0.5330   | 0.4693   | 0.4328   | 0.038         |
| H(14E) | 0.5760   | 0.4065   | 0.4387   | 0.038         |
| H(15G) | 0.6386   | 0.4242   | 0.4038   | 0.037         |
| H(15H) | 0.6111   | 0.4974   | 0.3993   | 0.037         |
| H(14C) | 0.5817   | 0.4769   | 0.3493   | 0.032         |
| H(14D) | 0.6507   | 0.4609   | 0.3569   | 0.032         |
| H(2BD) | 0.6105   | 0.3797   | -0.0075  | 0.026         |
| H(2BH) | 0.6648   | 0.3684   | -0.0498  | 0.029         |
| H(2BC) | 0.8565   | 0.2294   | -0.0642  | 0.027         |
| H(2BA) | 0.9306   | 0.1668   | -0.0302  | 0.027         |
| H(2BB) | 1.0081   | 0.1974   | 0.0832   | 0.036         |
| H(2BE) | 0.9822   | 0.2776   | 0.1198   | 0.041         |
| H(2BF) | 0.7727   | 0.3649   | 0.1376   | 0.031         |
| H(2BG) | 0.6733   | 0.3583   | 0.1079   | 0.028         |
| H(25A) | 0.8223   | 0.4198   | -0.0483  | 0.050         |
| H(25B) | 0.8480   | 0.4383   | -0.0776  | 0.050         |
| H(25C) | 0.8724   | 0.3749   | -0.0589  | 0.050         |
| H(26A) | 0.7983   | 0.4011   | -0.1223  | 0.043         |
| H(28A) | 0.7117   | 0.3014   | -0.1729  | 0.099         |
| H(28B) | 0.7532   | 0.3653   | -0.1698  | 0.099         |
| H(28C) | 0.6852   | 0.3724   | -0.1666  | 0.099         |
| H(29A) | 0.6756   | 0.2582   | -0.1279  | 0.053         |
| H(21I) | 0.7112   | 0.1903   | -0.0607  | 0.071         |
| H(21J) | 0.6593   | 0.1946   | -0.0879  | 0.071         |
| H(21K) | 0.6580   | 0.2410   | -0.0599  | 0.071         |
| H(21A) | 1.0141   | 0.2474   | 0.0015   | 0.048         |
| H(21B) | 1.0816   | 0.2262   | 0.0033   | 0.048         |
| H(21C) | 1.0579   | 0.2550   | 0.0316   | 0.048         |
| H(21D) | 1.1138   | 0.1203   | 0.0204   | 0.029         |
| H(21F) | 1.1458   | 0.0091   | 0.0273   | 0.060         |
| H(21G) | 1.0960   | -0.0470  | 0.0240   | 0.060         |
| H(21H) | 1.1224   | -0.0196  | 0.0557   | 0.060         |

**Table S25.** Continued

| atom   | $x$    | $y$     | $z$    | $U(\text{eq})$ |
|--------|--------|---------|--------|----------------|
| H(21E) | 0.9986 | -0.0146 | 0.0417 | 0.039          |
| H(22A) | 0.8732 | 0.0755  | 0.0273 | 0.061          |
| H(22B) | 0.8974 | 0.0758  | 0.0616 | 0.061          |
| H(22C) | 0.9006 | 0.0095  | 0.0430 | 0.061          |
| H(22F) | 0.9257 | 0.4447  | 0.0952 | 0.061          |
| H(22G) | 0.9154 | 0.5104  | 0.1131 | 0.061          |
| H(22H) | 0.8605 | 0.4663  | 0.0992 | 0.061          |
| H(22D) | 0.9366 | 0.5019  | 0.1634 | 0.050          |
| H(22L) | 0.9245 | 0.4462  | 0.2324 | 0.094          |
| H(22M) | 0.9555 | 0.5029  | 0.2158 | 0.094          |
| H(22N) | 0.9911 | 0.4373  | 0.2268 | 0.094          |
| H(22E) | 0.9187 | 0.3322  | 0.2067 | 0.048          |
| H(22I) | 0.8816 | 0.2364  | 0.1835 | 0.066          |
| H(22J) | 0.9097 | 0.2248  | 0.1542 | 0.066          |
| H(22K) | 0.8417 | 0.2437  | 0.1522 | 0.066          |
| H(23C) | 0.6270 | 0.5193  | 0.0549 | 0.046          |
| H(23D) | 0.6788 | 0.4661  | 0.0556 | 0.046          |
| H(23E) | 0.6557 | 0.4870  | 0.0853 | 0.046          |
| H(23B) | 0.5316 | 0.4803  | 0.0698 | 0.029          |
| H(23I) | 0.4260 | 0.4490  | 0.0584 | 0.064          |
| H(23J) | 0.4342 | 0.4020  | 0.0866 | 0.064          |
| H(23K) | 0.4091 | 0.3722  | 0.0551 | 0.064          |
| H(23A) | 0.4841 | 0.2916  | 0.0499 | 0.028          |
| H(23F) | 0.5514 | 0.2121  | 0.0397 | 0.054          |
| H(23G) | 0.6187 | 0.2242  | 0.0531 | 0.054          |
| H(23H) | 0.5960 | 0.2413  | 0.0195 | 0.054          |
| H(16C) | 1.0204 | 0.6542  | 0.0491 | 0.043          |
| H(16D) | 0.9988 | 0.5789  | 0.0510 | 0.043          |
| H(15A) | 0.9432 | 0.6496  | 0.0778 | 0.039          |
| H(15B) | 0.9221 | 0.6917  | 0.0486 | 0.039          |
| H(41A) | 0.8242 | 0.6605  | 0.0585 | 0.037          |
| H(41B) | 0.8481 | 0.6081  | 0.0836 | 0.037          |
| H(24O) | 0.8030 | 0.5211  | 0.0530 | 0.039          |
| H(24P) | 0.7555 | 0.5730  | 0.0616 | 0.039          |

**Table S25.** Continued

| atom   | <i>x</i>   | <i>y</i>   | <i>z</i>    | <i>U</i> (eq) |
|--------|------------|------------|-------------|---------------|
| H(24Q) | 0.6933     | 0.5375     | 0.0173      | 0.050         |
| H(24R) | 0.7442     | 0.4911     | 0.0082      | 0.050         |
| H(18F) | 0.6795     | 0.5245     | -0.0337     | 0.048         |
| H(18G) | 0.6937     | 0.6007     | -0.0256     | 0.048         |
| H(18I) | 0.7096     | 0.5945     | -0.0726     | 0.061         |
| H(18J) | 0.7399     | 0.5269     | -0.0806     | 0.061         |
| H(24K) | 0.9929(6)  | 0.6485(16) | -0.0388(2)  | 0.046         |
| H(24L) | 1.0422(13) | 0.5995(3)  | -0.0418(3)  | 0.046         |
| H(18D) | 1.0337     | 0.5564     | 0.0050      | 0.053         |
| H(18E) | 1.0559     | 0.6318     | 0.0060      | 0.053         |
| H(1A1) | 0.9330     | 0.5141     | -0.0812     | 0.039         |
| H(1A2) | 0.9790     | 0.5721     | -0.0840     | 0.039         |
| H(27A) | 0.8893     | 0.6102     | -0.1046     | 0.056         |
| H(27B) | 0.9053     | 0.6492     | -0.0740     | 0.056         |
| H(26B) | 0.7871     | 0.6134     | -0.1009     | 0.055         |
| H(26C) | 0.7984     | 0.6514     | -0.0700     | 0.055         |
| H(1B1) | 0.9403(11) | 0.659(6)   | -0.0703(4)  | 0.061         |
| H(1B2) | 0.957(3)   | 0.599(2)   | -0.0859(19) | 0.061         |
| H(27C) | 0.8619     | 0.6179     | -0.1012     | 0.056         |
| H(27D) | 0.8684     | 0.5514     | -0.0819     | 0.056         |
| H(26D) | 0.7623     | 0.6613     | -0.0610     | 0.055         |
| H(26E) | 0.7735     | 0.6381     | -0.0926     | 0.055         |
| H(3BH) | -0.0551    | 0.3747     | 0.3192      | 0.034         |
| H(3BG) | 0.0029     | 0.3575     | 0.2785      | 0.034         |
| H(3BC) | 0.1947     | 0.2142     | 0.2705      | 0.028         |
| H(3BA) | 0.2641     | 0.1503     | 0.3065      | 0.029         |
| H(3BD) | 0.3268     | 0.1751     | 0.4217      | 0.027         |
| H(3BF) | 0.3013     | 0.2593     | 0.4568      | 0.028         |
| H(3BB) | 0.0974     | 0.3736     | 0.4661      | 0.027         |
| H(3BE) | -0.0003    | 0.3707     | 0.4349      | 0.029         |
| H(35A) | 0.1880     | 0.4196     | 0.2517      | 0.058         |
| H(35B) | 0.2107     | 0.3585     | 0.2724      | 0.058         |
| H(35C) | 0.1607     | 0.4066     | 0.2811      | 0.058         |
| H(36A) | 0.1383     | 0.3783     | 0.2078      | 0.044         |

**Table S25.** Continued

| atom   | $x$     | $y$     | $z$    | $U(\text{eq})$ |
|--------|---------|---------|--------|----------------|
| H(38A) | 0.0582  | 0.2709  | 0.1597 | 0.090          |
| H(38B) | 0.0909  | 0.3411  | 0.1615 | 0.090          |
| H(38C) | 0.0221  | 0.3373  | 0.1636 | 0.090          |
| H(39A) | 0.0159  | 0.2354  | 0.2054 | 0.048          |
| H(31I) | 0.0059  | 0.1708  | 0.2474 | 0.081          |
| H(31J) | -0.0072 | 0.2251  | 0.2708 | 0.081          |
| H(31K) | 0.0513  | 0.1813  | 0.2768 | 0.081          |
| H(31F) | 0.3557  | 0.2384  | 0.3649 | 0.052          |
| H(31G) | 0.4164  | 0.2115  | 0.3565 | 0.052          |
| H(31H) | 0.4056  | 0.2113  | 0.3899 | 0.052          |
| H(31A) | 0.4404  | 0.0927  | 0.3642 | 0.030          |
| H(31C) | 0.4564  | -0.0203 | 0.3492 | 0.052          |
| H(31D) | 0.4026  | -0.0713 | 0.3442 | 0.052          |
| H(31E) | 0.4343  | -0.0553 | 0.3767 | 0.052          |
| H(31B) | 0.3049  | -0.0359 | 0.3548 | 0.031          |
| H(32L) | 0.2099  | -0.0042 | 0.3608 | 0.050          |
| H(32M) | 0.1934  | 0.0605  | 0.3413 | 0.050          |
| H(32N) | 0.2008  | 0.0652  | 0.3762 | 0.050          |
| H(32E) | 0.1818  | 0.4567  | 0.4302 | 0.042          |
| H(32F) | 0.2482  | 0.4395  | 0.4264 | 0.042          |
| H(32G) | 0.2341  | 0.5049  | 0.4437 | 0.042          |
| H(32H) | 0.2611  | 0.4978  | 0.4938 | 0.035          |
| H(32I) | 0.2609  | 0.4412  | 0.5644 | 0.062          |
| H(32J) | 0.2817  | 0.5013  | 0.5459 | 0.062          |
| H(32K) | 0.3247  | 0.4399  | 0.5547 | 0.062          |
| H(32A) | 0.2465  | 0.3291  | 0.5391 | 0.033          |
| H(32B) | 0.1987  | 0.2353  | 0.5169 | 0.047          |
| H(32C) | 0.2367  | 0.2186  | 0.4915 | 0.047          |
| H(32D) | 0.1687  | 0.2374  | 0.4834 | 0.047          |
| H(33I) | 0.0000  | 0.4691  | 0.3665 | 0.074          |
| H(33J) | -0.0137 | 0.4967  | 0.3973 | 0.074          |
| H(33K) | -0.0513 | 0.5222  | 0.3674 | 0.074          |
| H(33E) | -0.1451 | 0.4886  | 0.3814 | 0.041          |
| H(33F) | -0.2460 | 0.4569  | 0.3794 | 0.072          |



**Table S25.** Continued

| atom   | $x$     | $y$    | $z$    | $U(\text{eq})$ |
|--------|---------|--------|--------|----------------|
| H(33G) | -0.2406 | 0.4113 | 0.4080 | 0.072          |
| H(33H) | -0.2639 | 0.3804 | 0.3765 | 0.072          |
| H(33A) | -0.1841 | 0.2950 | 0.3848 | 0.031          |
| H(33B) | -0.1153 | 0.2119 | 0.3802 | 0.051          |
| H(33C) | -0.0572 | 0.2310 | 0.4022 | 0.051          |
| H(33D) | -0.0561 | 0.2302 | 0.3676 | 0.051          |
| H(33L) | 0.1567  | 0.6592 | 0.3876 | 0.037          |
| H(33M) | 0.1715  | 0.6059 | 0.4135 | 0.037          |
| H(34A) | 0.1334  | 0.5206 | 0.3802 | 0.039          |
| H(34B) | 0.0838  | 0.5743 | 0.3845 | 0.039          |
| H(34C) | 0.0357  | 0.5378 | 0.3365 | 0.048          |
| H(34D) | 0.0899  | 0.4920 | 0.3307 | 0.048          |
| H(34E) | 0.0395  | 0.5318 | 0.2852 | 0.054          |
| H(34F) | 0.0499  | 0.6067 | 0.2964 | 0.054          |
| H(34G) | 0.0943  | 0.6147 | 0.2529 | 0.067          |
| H(34H) | 0.1013  | 0.5374 | 0.2465 | 0.067          |
| H(2A1) | 0.2951  | 0.5903 | 0.2562 | 0.055          |
| H(2A2) | 0.2774  | 0.5290 | 0.2344 | 0.055          |
| H(2B1) | 0.2586  | 0.5293 | 0.2428 | 0.055          |
| H(2B2) | 0.3025  | 0.5852 | 0.2551 | 0.055          |
| H(34M) | 0.3357  | 0.6184 | 0.3002 | 0.037          |
| H(34N) | 0.3944  | 0.5747 | 0.3016 | 0.037          |
| H(34O) | 0.3866  | 0.5492 | 0.3517 | 0.043          |
| H(34P) | 0.3986  | 0.6264 | 0.3466 | 0.043          |
| H(34Q) | 0.3548  | 0.6527 | 0.3884 | 0.037          |
| H(34R) | 0.3346  | 0.5783 | 0.3942 | 0.037          |
| H(34S) | 0.2704  | 0.6531 | 0.4117 | 0.039          |
| H(34T) | 0.2567  | 0.6872 | 0.3801 | 0.039          |
| H(35D) | 0.0785  | 0.6266 | 0.3788 | 0.060          |
| H(35E) | 0.1018  | 0.5514 | 0.3785 | 0.060          |
| H(35F) | 0.0231  | 0.5774 | 0.3387 | 0.053          |
| H(35G) | 0.0688  | 0.6249 | 0.3257 | 0.053          |
| H(35H) | 0.0164  | 0.5062 | 0.2974 | 0.075          |
| H(35I) | 0.0722  | 0.4614 | 0.2934 | 0.075          |

**Table S25.** Continued

| atom   | $x$        | $y$      | $z$       | $U(\text{eq})$ |
|--------|------------|----------|-----------|----------------|
| H(35J) | 0.0499     | 0.5370   | 0.2557    | 0.068          |
| H(35K) | 0.0609     | 0.5962   | 0.2789    | 0.068          |
| H(35L) | 0.1561     | 0.6414   | 0.2663    | 0.046          |
| H(35M) | 0.1275     | 0.6042   | 0.2370    | 0.046          |
| H(35N) | 0.2118     | 0.5361   | 0.2403    | 0.063          |
| H(35O) | 0.2272     | 0.6129   | 0.2365    | 0.063          |
| H(35P) | 0.3234     | 0.5753   | 0.2585    | 0.061          |
| H(35Q) | 0.3039     | 0.5050   | 0.2699    | 0.061          |
| H(35R) | 0.3889     | 0.5373   | 0.3015    | 0.037          |
| H(35S) | 0.3613     | 0.6087   | 0.3066    | 0.037          |
| H(35T) | 0.399(7)   | 0.556(2) | 0.3501(7) | 0.048          |
| H(35U) | 0.3617(10) | 0.507(7) | 0.365(2)  | 0.048          |
| H(35V) | 0.3594     | 0.6077   | 0.3898    | 0.052          |
| H(35W) | 0.3412     | 0.6464   | 0.3595    | 0.052          |
| H(36B) | 0.2503     | 0.6904   | 0.3741    | 0.039          |
| H(36C) | 0.2765     | 0.6602   | 0.4056    | 0.039          |
| H(36D) | 0.1929     | 0.5858   | 0.4023    | 0.062          |
| H(36E) | 0.1719     | 0.6617   | 0.4020    | 0.062          |
| H(42C) | 0.6566     | 0.9296   | 0.3574    | 0.022          |
| H(42D) | 0.7084     | 0.8990   | 0.3809    | 0.022          |
| H(42K) | 0.6688     | 0.8320   | 0.3344    | 0.069          |
| H(42L) | 0.7376     | 0.8276   | 0.3478    | 0.069          |
| H(42M) | 0.7581     | 0.8755   | 0.3068    | 0.059          |
| H(42N) | 0.6894     | 0.8886   | 0.2956    | 0.059          |
| H(43J) | 0.7633     | 0.9852   | 0.3146    | 0.052          |
| H(43K) | 0.6934     | 0.9915   | 0.3140    | 0.052          |
| H(42A) | 0.5221     | 0.6410   | 0.0769    | 0.068          |
| H(42B) | 0.4603     | 0.6706   | 0.0615    | 0.068          |
| H(42E) | 0.5013     | 0.7187   | 0.0245    | 0.059          |
| H(42F) | 0.5566     | 0.7236   | 0.0503    | 0.059          |
| H(42G) | 0.5995     | 0.6293   | 0.0348    | 0.051          |
| H(42H) | 0.5703     | 0.6599   | 0.0037    | 0.051          |
| H(42I) | 0.4923     | 0.5896   | -0.0003   | 0.045          |
| H(42J) | 0.5395     | 0.5426   | 0.0190    | 0.045          |

**Table S25.** Continued

| atom   | $x$    | $y$     | $z$    | $U(\text{eq})$ |
|--------|--------|---------|--------|----------------|
| H(43M) | 0.2091 | 0.8635  | 0.2382 | 0.071          |
| H(43G) | 0.1396 | 0.8682  | 0.2263 | 0.071          |
| H(43E) | 0.1980 | 0.7647  | 0.2552 | 0.078          |
| H(43F) | 0.1283 | 0.7720  | 0.2459 | 0.078          |
| H(55A) | 0.2074 | 0.7061  | 0.2190 | 0.076          |
| H(55B) | 0.1382 | 0.6933  | 0.2177 | 0.076          |
| H(43H) | 0.1152 | 0.7644  | 0.1836 | 0.060          |
| H(43I) | 0.1749 | 0.7334  | 0.1750 | 0.060          |
| H(61A) | 0.8984 | 0.6539  | 0.3632 | 0.042          |
| H(61B) | 0.8381 | 0.6143  | 0.3526 | 0.042          |
| H(62A) | 0.8137 | 0.6109  | 0.3990 | 0.055          |
| H(62B) | 0.8837 | 0.6179  | 0.4087 | 0.055          |
| H(63A) | 0.8027 | 0.7109  | 0.4164 | 0.060          |
| H(63B) | 0.8728 | 0.7199  | 0.4237 | 0.060          |
| H(64A) | 0.8085 | 0.7864  | 0.3841 | 0.039          |
| H(64B) | 0.8773 | 0.7735  | 0.3839 | 0.039          |
| H(24M) | 0.3474 | 0.4768  | 0.4557 | 0.037          |
| H(24N) | 0.3905 | 0.4984  | 0.4329 | 0.037          |
| H(24I) | 0.3306 | 0.5877  | 0.4554 | 0.041          |
| H(24J) | 0.3957 | 0.6051  | 0.4488 | 0.041          |
| H(24C) | 0.4237 | 0.6171  | 0.4973 | 0.048          |
| H(24D) | 0.3612 | 0.5901  | 0.5040 | 0.048          |
| H(24A) | 0.4590 | 0.5188  | 0.5148 | 0.046          |
| H(24B) | 0.3946 | 0.4858  | 0.5107 | 0.046          |
| H(57A) | 0.8672 | -0.0629 | 0.3458 | 0.073          |
| H(57B) | 0.9378 | -0.0625 | 0.3551 | 0.073          |
| H(58A) | 0.9378 | -0.0071 | 0.3104 | 0.063          |
| H(58B) | 0.8708 | 0.0167  | 0.3092 | 0.063          |
| H(59A) | 0.9018 | 0.1151  | 0.3277 | 0.070          |
| H(59B) | 0.9691 | 0.0912  | 0.3289 | 0.070          |
| H(60A) | 0.9757 | 0.0552  | 0.3796 | 0.082          |
| H(60B) | 0.9223 | 0.1066  | 0.3808 | 0.082          |
| H(57C) | 0.9528 | -0.0321 | 0.3141 | 0.073          |
| H(57D) | 0.8862 | -0.0076 | 0.3065 | 0.073          |

**Table S25.** Continued

| atom   | <i>x</i> | <i>y</i> | <i>z</i> | <i>U</i> (eq) |
|--------|----------|----------|----------|---------------|
| H(58C) | 0.9446   | -0.0312  | 0.3607   | 0.063         |
| H(58D) | 0.8787   | -0.0026  | 0.3532   | 0.063         |
| H(59C) | 0.9129   | 0.0959   | 0.3705   | 0.070         |
| H(59D) | 0.9797   | 0.0698   | 0.3737   | 0.070         |
| H(60C) | 0.9200   | 0.1440   | 0.3284   | 0.082         |
| H(60D) | 0.9891   | 0.1300   | 0.3349   | 0.082         |
| H(311) | 0.7707   | 0.1067   | -0.0385  | 0.050         |
| H(312) | 0.7454   | 0.1146   | -0.0165  | 0.050         |

<sup>a</sup>*U*(eq) is defined as one third of the trace of the orthogonalized  $\mathbf{U}_{ij}$  tensor the estimated standard deviations of the least significant digits are given in parentheses.

## Supporting Information

Table S1. fit parameters

Table S2. Complete Crystallographic Details for  $[\text{Fe}(\text{TPP})(\text{CN})(\text{Py})]\cdot 0.65\text{Py}$ .

Table S3. Atomic Coordinates and Equivalent Isotropic Displacement Parameters for  $[\text{Fe}(\text{TPP})(\text{CN})(\text{Py})]\cdot 0.65\text{Py}$

Table S4. Bond Lengths for  $[\text{Fe}(\text{TPP})(\text{CN})(\text{Py})]\cdot 0.65\text{Py}$ .

Table S5. Bond Angles for  $[\text{Fe}(\text{TPP})(\text{CN})(\text{Py})]\cdot 0.65\text{Py}$ .

Table S6. Anisotropic Isotropic Displacement Parameters for  $[\text{Fe}(\text{TPP})(\text{CN})(\text{Py})]\cdot 0.65\text{Py}$ .

Table S7. Hydrogen Coordinates and Isotropic Displacement Parameters for  $[\text{Fe}(\text{TPP})(\text{CN})(\text{Py})]\cdot 0.65\text{Py}$ .

Table S8. Complete Crystallographic Details for  $[\text{Fe}(\text{TPP})(\text{CN})(1\text{-MeIm})]\cdot 1\text{-MeIm}\cdot \text{CHCl}_3$ .

Table S9. Atomic Coordinates and Equivalent Isotropic Displacement Parameters for  $[\text{Fe}(\text{TPP})(\text{CN})(1\text{-MeIm})]\cdot 1\text{-MeIm}\cdot \text{CHCl}_3$ .

Table S10. Bond Lengths for  $[\text{Fe}(\text{TPP})(\text{CN})(1\text{-MeIm})]\cdot 1\text{-MeIm}\cdot \text{CHCl}_3$ .

Table S11. Bond Angles for  $[\text{Fe}(\text{TPP})(\text{CN})(1\text{-MeIm})]\cdot 1\text{-MeIm}\cdot \text{CHCl}_3$ .

Table S12. Anisotropic Isotropic Displacement Parameters for  $[\text{Fe}(\text{TPP})(\text{CN})(1\text{-MeIm})]\cdot 1\text{-MeIm}\cdot \text{CHCl}_3$ .

Table S13. Hydrogen Coordinates and Isotropic Displacement Parameters for  $[\text{Fe}(\text{TPP})(\text{CN})(1\text{-MeIm})]\cdot 1\text{-MeIm}\cdot \text{CHCl}_3$ .

Table S14. Complete Crystallographic Details for  $[\text{Fe}(\text{TMP})(\text{CN})(1\text{-MeIm})]\cdot 1.8\text{CHCl}_3$ .

Table S15. Atomic Coordinates and Equivalent Isotropic Displacement Parameters for  $[\text{Fe}(\text{TMP})(\text{CN})(1\text{-MeIm})]\cdot 1.8\text{CHCl}_3$ .

Table S16. Bond Lengths for  $[\text{Fe}(\text{TMP})(\text{CN})(1\text{-MeIm})]\cdot 1.8\text{CHCl}_3$ .

Table S17. Bond Angles for  $[\text{Fe}(\text{TMP})(\text{CN})(1\text{-MeIm})]\cdot 1.8\text{CHCl}_3$ .

Table S18. Anisotropic Isotropic Displacement Parameters for  $[\text{Fe}(\text{TMP})(\text{CN})(1\text{-MeIm})]\cdot 1.8\text{CHCl}_3$ .

Table S19. Hydrogen Coordinates and Isotropic Displacement Parameters for  $[\text{Fe}(\text{TMP})(\text{CN})(1\text{-MeIm})]\cdot 1.8\text{CHCl}_3$ .

Table S20. Complete Crystallographic Details for  $3[\text{K}(18\text{-crown-6})][\text{Fe}(\text{TMP})(\text{CN})_2]\cdot 5.1(\text{THF})\cdot 0.9\text{H}_2\text{O}$ .

Table S21. Atomic Coordinates and Equivalent Isotropic Displacement Parameters for  $3[\text{K}(18\text{-crown-6})][\text{Fe}(\text{TMP})(\text{CN})_2]\cdot 5.1(\text{THF})\cdot 0.9\text{H}_2\text{O}$ .

Table S22. Bond Lengths for  $3[\text{K}(18\text{-crown-6})][\text{Fe}(\text{TMP})(\text{CN})_2]\cdot 5.1(\text{THF})\cdot 0.9\text{H}_2\text{O}$ .

Table S23. Bond Angles for  $3[\text{K}(18\text{-crown-6})][\text{Fe}(\text{TMP})(\text{CN})_2]\cdot 5.1(\text{THF})\cdot 0.9\text{H}_2\text{O}$ .

Table S24. Anisotropic Isotropic Displacement Parameters for  $3[\text{K}(18\text{-crown-6})][\text{Fe}(\text{TMP})(\text{CN})_2]\cdot 5.1(\text{THF})\cdot 0.9\text{H}_2\text{O}$ .

Table S25. Hydrogen Coordinates and Isotropic Displacement Parameters for  $3[\text{K}(18\text{-crown-6})][\text{Fe}(\text{TMP})(\text{CN})_2]\cdot 5.1(\text{THF})\cdot 0.9\text{H}_2\text{O}$ .

## Supporting Information Figure Captions

Figure S1. ORTEP diagram of the second unit in the cell of  $[\text{K}(\text{18-C-6})][\text{Fe}(\text{TMP})(\text{CN})_2]$  displaying the atom labeling scheme. Thermal ellipsoids of all atoms are contoured at the 50% probability level. Hydrogen atoms have been omitted for clarity.

Figure S2. ORTEP diagram of the third unit in  $[\text{K}(\text{18-C-6})][\text{Fe}(\text{TMP})(\text{CN})_2]$  displaying the atom labeling scheme. Thermal ellipsoids of all atoms are contoured at the 50% probability level. Hydrogen atoms have been omitted for clarity.

Figure S3. ORTEP diagram of the ordered 18-crown-6 ring in the first  $[\text{K}(\text{18-C-6})][\text{Fe}(\text{TMP})(\text{CN})_2]$  unit displaying the atom labeling scheme. 50% probability countours are shown.

Figure S4. ORTEP diagram of the disordered 18-crown-6 ring in the second  $[\text{K}(\text{18-C-6})][\text{Fe}(\text{TMP})(\text{CN})_2]$  unit displaying the atom labeling scheme. 50% probability countours are shown.

Figure S5. ORTEP diagram of the disordered 18-crown-6 ring in the third  $[\text{K}(\text{18-C-6})][\text{Fe}(\text{TMP})(\text{CN})_2]$  unit displaying the atom labeling scheme. 50% probability countours are shown.

Figure S6. Formal diagrams of the porphyrin cores for all entities (1, 2, 3) of  $[\text{K}(\text{18-C-6})][\text{Fe}(\text{TMP})(\text{CN})_2]$ . Averaged values of the chemically unique bond distances (in 0.01 Å) and angles (in degrees) are shown. Positive values of displacements are toward the cyanide ligand that is not also coordinated to the  $[\text{K}(\text{18-crown-6})]$  cation.

Figure S7. EPR spectra for  $[\text{Fe}(\text{TPP})(\text{CN})(\text{Py})]$  in the solid state and in a frozen  $\text{CH}_2\text{Cl}_2$  solution.

Figure S8. EPR spectra for  $[\text{Fe}(\text{TPP})(\text{CN})(1\text{-MeIm})]$  in the solid state and in a frozen  $\text{CH}_2\text{Cl}_2$  solution.

Figure S9. EPR spectra for  $[\text{Fe}(\text{TMP})(\text{CN})(1\text{-MeIm})]$  in the solid state and in a frozen  $\text{CH}_2\text{Cl}_2$  solution.

Figure S10. Mössbauer spectra for  $[\text{K}((\text{CH}_3)_2\text{CO})_2][\text{Fe}(\text{TPP})(\text{CN})_2]$  over the temperature range of 298 – 15 K.

Figure S11. Mössbauer spectra for  $[\text{K}(18\text{-C-6})][\text{Fe}(\text{TMP})(\text{CN})_2]$  over the temperature range of 298 – 15 K.

Figure S12. Mössbauer spectra for  $[\text{Fe}(\text{TMP})(\text{CN})(1\text{-MeIm})]$  over the temperature range of 298 – 15 K.

Figure S13. Mössbauer spectra for  $[\text{Fe}(\text{TPP})(\text{CN})(1\text{-MeIm})]$  over the temperature range of 298 – 15 K.

Figure S14. Mössbauer spectra for  $[\text{Fe}(\text{TPP})(\text{CN})(\text{Py})]$  over the temperature range of 298 – 15 K.

Figure S15.  $\Delta E_Q$  predictions.
